# Supplementary material
Source: publisher figshare collection journal article supplement (https://acs.figshare.com/ndownloader/files/3804886)
Supplement: Supplementary file 1 [file 3804886]

 
data_compound21
 
_audit_creation_method            SHELXL-2013
_chemical_name_systematic
;
 ?
;
_chemical_name_common             ?
_chemical_melting_point           ?
_chemical_formula_moiety          ?
_chemical_formula_sum
 'C32 H26 N4 O2' 
_chemical_formula_weight          498.57

loop_
 _atom_type_symbol
 _atom_type_description
 _atom_type_scat_dispersion_real
 _atom_type_scat_dispersion_imag
 _atom_type_scat_source
 'C'  'C'   0.0192   0.0096
 'International Tables Vol C Tables 4.2.6.8 and 6.1.1.4'
 'H'  'H'   0.0000   0.0000
 'International Tables Vol C Tables 4.2.6.8 and 6.1.1.4'
 'N'  'N'   0.0330   0.0189
 'International Tables Vol C Tables 4.2.6.8 and 6.1.1.4'
 'O'  'O'   0.0517   0.0336
 'International Tables Vol C Tables 4.2.6.8 and 6.1.1.4'
 
_space_group_crystal_system       monoclinic
_space_group_IT_number            15
_space_group_name_H-M_alt         'C 2/c'
_space_group_name_Hall            '-C 2yc'
 
_shelx_space_group_comment
;
The symmetry employed for this shelxl refinement is uniquely defined
by the following loop, which should always be used as a source of
symmetry information in preference to the above space-group names.
They are only intended as comments.
;
 
loop_
 _space_group_symop_operation_xyz
 'x, y, z'
 '-x, y, -z+1/2'
 'x+1/2, y+1/2, z'
 '-x+1/2, y+1/2, -z+1/2'
 '-x, -y, -z'
 'x, -y, z-1/2'
 '-x+1/2, -y+1/2, -z'
 'x+1/2, -y+1/2, z-1/2'
 
_cell_length_a                    16.098(3)
_cell_length_b                    8.0852(16)
_cell_length_c                    19.417(4)
_cell_angle_alpha                 90
_cell_angle_beta                  103.12(3)
_cell_angle_gamma                 90
_cell_volume                      2461.3(9)
_cell_formula_units_Z             4
_cell_measurement_temperature     123(2)
_cell_measurement_reflns_used     7471 
_cell_measurement_theta_min       2.3 
_cell_measurement_theta_max       72.1 
 
_exptl_crystal_description        prism 
_exptl_crystal_colour             yellow 
_exptl_crystal_density_meas       ? 
_exptl_crystal_density_method     ?              
_exptl_crystal_density_diffrn     1.345          
_exptl_crystal_F_000              1048
_exptl_transmission_factor_min    ?                                             
_exptl_transmission_factor_max    ?                                             
_exptl_crystal_size_max           0.1 
_exptl_crystal_size_mid           0.05 
_exptl_crystal_size_min           0.05 
_exptl_absorpt_coefficient_mu     0.653
_shelx_estimated_absorpt_T_min    ? 
_shelx_estimated_absorpt_T_max    ? 
_exptl_absorpt_correction_type    'Multi-scan' 
_exptl_absorpt_correction_T_min   0.380 
_exptl_absorpt_correction_T_max   1.000 
_exptl_absorpt_process_details    ? 
 
_exptl_special_details
;
 ?
;
 
_diffrn_ambient_temperature       123(2)
_diffrn_radiation_wavelength      1.54178
_diffrn_radiation_type            CuK\a
_diffrn_source                    'Rotating Anode'                       
_diffrn_measurement_device_type    
;
AFC11 (Right): Eulerian 3 circle
;
_diffrn_detector                  'PILT'
_diffrn_measurement_method        'profile data from \w-scans' 
_diffrn_detector_area_resol_mean  5.8140 
_diffrn_reflns_number             8618
_diffrn_reflns_av_unetI/netI      0.0359
_diffrn_reflns_av_R_equivalents   0.0553
_diffrn_reflns_limit_h_min        -18
_diffrn_reflns_limit_h_max        19
_diffrn_reflns_limit_k_min        -9
_diffrn_reflns_limit_k_max        9
_diffrn_reflns_limit_l_min        -23
_diffrn_reflns_limit_l_max        24
_diffrn_reflns_theta_min          5.644
_diffrn_reflns_theta_max          72.612
_diffrn_reflns_theta_full         67.679
_diffrn_measured_fraction_theta_max   0.981
_diffrn_measured_fraction_theta_full  0.989
_diffrn_reflns_Laue_measured_fraction_max    0.981
_diffrn_reflns_Laue_measured_fraction_full   0.989
_diffrn_reflns_point_group_measured_fraction_max   0.981
_diffrn_reflns_point_group_measured_fraction_full  0.989
_reflns_number_total              2383
_reflns_number_gt                 2022
_reflns_threshold_expression      'I > 2\s(I)'
_reflns_Friedel_coverage          0.000
_reflns_Friedel_fraction_max      .
_reflns_Friedel_fraction_full     .
 
_reflns_special_details
;
 Reflections were merged by SHELXL according to the crystal
 class for the calculation of statistics and refinement.
 
 _reflns_Friedel_fraction is defined as the number of unique
 Friedel pairs measured divided by the number that would be
 possible theoretically, ignoring centric projections and
 systematic absences.
;
 
_computing_data_collection       
;
CrystalClear-SM Expert 2.1 b32 (Rigaku, 2014)
;
_computing_cell_refinement        
;
CrystalClear-SM Expert 2.1 b32 (Rigaku, 2014)
;
_computing_data_reduction         
;
CrystalClear-SM Expert 2.1 b32 (Rigaku, 2014)
;
_computing_structure_solution    'SHELXT (Sheldrick, 2014)'
_computing_structure_refinement   'SHELXL-2013 (Sheldrick, 2013)'
_computing_molecular_graphics    'ShelXle (Hübschle, 2011)' 
_computing_publication_material  'WinGX publication routines (Farrugia, 1999)' 
 
_refine_special_details
;
 ?
;
_refine_ls_structure_factor_coef  Fsqd
_refine_ls_matrix_type            full
_refine_ls_weighting_scheme       calc
_refine_ls_weighting_details
'w=1/[\s^2^(Fo^2^)+(0.0708P)^2^+2.0613P] where P=(Fo^2^+2Fc^2^)/3'
_atom_sites_solution_primary      ?
_atom_sites_solution_secondary    ?
_atom_sites_solution_hydrogens    geom
_refine_ls_hydrogen_treatment     mixed
_refine_ls_extinction_method      SHELXL
_refine_ls_extinction_coef        0.0011(2)
_refine_ls_extinction_expression
 'Fc^*^=kFc[1+0.001xFc^2^\l^3^/sin(2\q)]^-1/4^'
_refine_ls_number_reflns          2383
_refine_ls_number_parameters      184
_refine_ls_number_restraints      0
_refine_ls_R_factor_all           0.0590
_refine_ls_R_factor_gt            0.0527
_refine_ls_wR_factor_ref          0.1506
_refine_ls_wR_factor_gt           0.1479
_refine_ls_goodness_of_fit_ref    1.119
_refine_ls_restrained_S_all       1.119
_refine_ls_shift/su_max           0.000
_refine_ls_shift/su_mean          0.000
 
loop_
 _atom_site_label
 _atom_site_type_symbol
 _atom_site_fract_x
 _atom_site_fract_y
 _atom_site_fract_z
 _atom_site_U_iso_or_equiv
 _atom_site_adp_type
 _atom_site_occupancy
 _atom_site_site_symmetry_order  
 _atom_site_calc_flag
 _atom_site_refinement_flags_posn
 _atom_site_refinement_flags_adp
 _atom_site_refinement_flags_occupancy
 _atom_site_disorder_assembly
 _atom_site_disorder_group
O001 O 0.51450(10) -0.17118(19) 0.36210(7) 0.0409(4) Uani 1 1 d . . . . .
N002 N 0.54316(10) 0.2049(2) 0.52372(8) 0.0304(4) Uani 1 1 d . . . . .
H002 H 0.5287(4) 0.2258(6) 0.5689(12) 0.036 Uiso 1 1 calc R U . . .
N003 N 0.64368(11) 0.6023(2) 0.49394(9) 0.0363(4) Uani 1 1 d . . . . .
H003 H 0.6494(2) 0.6047(2) 0.4492(14) 0.044 Uiso 1 1 calc R U . . .
C004 C 0.63833(12) 0.3310(2) 0.37925(10) 0.0299(4) Uani 1 1 d . . . . .
C005 C 0.58578(12) 0.3148(3) 0.49093(10) 0.0305(4) Uani 1 1 d . . . . .
C006 C 0.59631(12) 0.2418(3) 0.42931(10) 0.0306(4) Uani 1 1 d . . . . .
C007 C 0.59081(13) 0.4397(3) 0.32954(10) 0.0320(5) Uani 1 1 d . . . . .
H007 H 0.5291(16) 0.4526(4) 0.32651(12) 0.038 Uiso 1 1 calc R U . . .
C008 C 0.52348(12) 0.0647(3) 0.48645(10) 0.0310(4) Uani 1 1 d . . . . .
C009 C 0.61273(12) 0.4705(3) 0.52527(10) 0.0320(5) Uani 1 1 d . . . . .
C00A C 0.55711(12) 0.0806(3) 0.42433(10) 0.0320(5) Uani 1 1 d . . . . .
C00B C 0.71532(14) 0.5117(3) 0.28768(11) 0.0379(5) Uani 1 1 d . . . . .
H00B H 0.7422(8) 0.5737(18) 0.2554(9) 0.045 Uiso 1 1 calc R U . . .
C00C C 0.62924(14) 0.5299(3) 0.28434(10) 0.0350(5) Uani 1 1 d . . . . .
H00C H 0.5966(10) 0.603(2) 0.2515(10) 0.042 Uiso 1 1 calc R U . . .
C00D C 0.61495(13) 0.5166(3) 0.59385(11) 0.0372(5) Uani 1 1 d . . . . .
H00D H 0.5965(5) 0.4467(19) 0.6304(10) 0.045 Uiso 1 1 calc R U . . .
C00E C 0.72526(13) 0.3162(3) 0.38278(11) 0.0385(5) Uani 1 1 d . . . . .
H00E H 0.7588(10) 0.245(2) 0.4167(10) 0.046 Uiso 1 1 calc R U . . .
C00F C 0.55394(14) -0.0382(3) 0.36743(10) 0.0362(5) Uani 1 1 d . . . . .
C00G C 0.64764(13) 0.6790(3) 0.60408(11) 0.0386(5) Uani 1 1 d . . . . .
H00G H 0.6564(3) 0.7417(19) 0.6467(13) 0.046 Uiso 1 1 calc R U . . .
C00H C 0.66441(13) 0.7293(3) 0.54131(11) 0.0384(5) Uani 1 1 d . . . . .
H00H H 0.6863(7) 0.833(3) 0.5323(3) 0.046 Uiso 1 1 calc R U . . .
C00I C 0.76353(14) 0.4057(3) 0.33678(11) 0.0412(5) Uani 1 1 d . . . . .
H00I H 0.8239(18) 0.3934(5) 0.33928(14) 0.049 Uiso 1 1 calc R U . . .
C00J C 0.60285(19) -0.0032(3) 0.31088(13) 0.0513(7) Uani 1 1 d . . . . .
H00A H 0.5925 -0.0902 0.2763 0.077 Uiso 1 1 calc R U . . .
H00F H 0.6627 0.0024 0.3322 0.077 Uiso 1 1 calc R U . . .
H00J H 0.5843 0.1003 0.2883 0.077 Uiso 1 1 calc R U . . .
 
loop_
 _atom_site_aniso_label
 _atom_site_aniso_U_11
 _atom_site_aniso_U_22
 _atom_site_aniso_U_33
 _atom_site_aniso_U_23
 _atom_site_aniso_U_13
 _atom_site_aniso_U_12
O001 0.0588(9) 0.0383(9) 0.0312(7) -0.0008(6) 0.0221(7) -0.0011(7)
N002 0.0339(8) 0.0365(9) 0.0230(8) 0.0009(6) 0.0111(6) 0.0024(7)
N003 0.0417(9) 0.0398(10) 0.0310(9) 0.0015(7) 0.0155(7) 0.0004(8)
C004 0.0348(10) 0.0343(10) 0.0231(8) 0.0000(7) 0.0120(7) 0.0036(8)
C005 0.0290(9) 0.0385(11) 0.0256(9) 0.0053(8) 0.0094(7) 0.0056(8)
C006 0.0310(9) 0.0372(11) 0.0253(9) 0.0044(7) 0.0102(7) 0.0072(8)
C007 0.0359(10) 0.0373(11) 0.0242(9) 0.0006(8) 0.0095(8) 0.0044(8)
C008 0.0326(9) 0.0368(11) 0.0252(9) 0.0030(8) 0.0097(7) 0.0052(8)
C009 0.0287(9) 0.0408(11) 0.0274(9) 0.0031(8) 0.0081(7) 0.0044(8)
C00A 0.0356(10) 0.0379(11) 0.0250(9) 0.0038(8) 0.0125(8) 0.0070(8)
C00B 0.0476(12) 0.0422(12) 0.0272(10) -0.0014(8) 0.0156(9) -0.0075(9)
C00C 0.0471(11) 0.0344(11) 0.0240(9) 0.0006(8) 0.0092(8) 0.0014(9)
C00D 0.0384(11) 0.0474(13) 0.0276(10) 0.0013(9) 0.0113(8) 0.0019(9)
C00E 0.0372(11) 0.0504(13) 0.0300(10) 0.0063(9) 0.0122(8) 0.0087(9)
C00F 0.0463(11) 0.0367(12) 0.0294(10) 0.0042(8) 0.0165(9) 0.0061(9)
C00G 0.0385(11) 0.0452(13) 0.0325(10) -0.0051(9) 0.0090(8) 0.0015(9)
C00H 0.0367(11) 0.0402(12) 0.0389(11) -0.0019(9) 0.0098(9) -0.0006(9)
C00I 0.0355(11) 0.0552(14) 0.0365(11) 0.0016(10) 0.0154(9) 0.0010(10)
C00J 0.0816(17) 0.0404(13) 0.0447(13) -0.0069(10) 0.0415(13) -0.0083(12)
 
_geom_special_details
;
 All esds (except the esd in the dihedral angle between two l.s. planes)
 are estimated using the full covariance matrix.  The cell esds are taken
 into account individually in the estimation of esds in distances, angles
 and torsion angles; correlations between esds in cell parameters are only
 used when they are defined by crystal symmetry.  An approximate (isotropic)
 treatment of cell esds is used for estimating esds involving l.s. planes.
;
 
loop_
 _geom_bond_atom_site_label_1
 _geom_bond_atom_site_label_2
 _geom_bond_distance
 _geom_bond_site_symmetry_2
 _geom_bond_publ_flag
O001 C00F 1.241(3) . ?
N002 C008 1.344(3) . ?
N002 C005 1.365(3) . ?
N002 H002 0.97(2) . ?
N003 C00H 1.368(3) . ?
N003 C009 1.375(3) . ?
N003 H003 0.89(3) . ?
C004 C00E 1.391(3) . ?
C004 C007 1.398(3) . ?
C004 C006 1.490(3) . ?
C005 C006 1.379(3) . ?
C005 C009 1.445(3) . ?
C006 C00A 1.441(3) . ?
C007 C00C 1.390(3) . ?
C007 H007 0.99(3) . ?
C008 C00A 1.436(3) . ?
C008 C008 1.457(4) 5_656 ?
C009 C00D 1.375(3) . ?
C00A C00F 1.456(3) . ?
C00B C00C 1.380(3) . ?
C00B C00I 1.382(3) . ?
C00B H00B 0.98(3) . ?
C00C H00C 0.94(3) . ?
C00D C00G 1.412(3) . ?
C00D H00D 1.00(3) . ?
C00E C00I 1.397(3) . ?
C00E H00E 0.95(3) . ?
C00F C00J 1.516(3) . ?
C00G C00H 1.369(3) . ?
C00G H00G 0.95(3) . ?
C00H H00H 0.94(3) . ?
C00I H00I 0.97(3) . ?
C00J H00A 0.9600 . ?
C00J H00F 0.9600 . ?
C00J H00J 0.9600 . ?
 
loop_
 _geom_angle_atom_site_label_1
 _geom_angle_atom_site_label_2
 _geom_angle_atom_site_label_3
 _geom_angle
 _geom_angle_site_symmetry_1
 _geom_angle_site_symmetry_3
 _geom_angle_publ_flag
C008 N002 C005 112.32(16) . . ?
C008 N002 H002 123.8 . . ?
C005 N002 H002 123.8 . . ?
C00H N003 C009 109.99(17) . . ?
C00H N003 H003 125.0 . . ?
C009 N003 H003 125.0 . . ?
C00E C004 C007 118.37(18) . . ?
C00E C004 C006 121.78(18) . . ?
C007 C004 C006 119.77(17) . . ?
N002 C005 C006 107.46(18) . . ?
N002 C005 C009 118.81(17) . . ?
C006 C005 C009 133.67(18) . . ?
C005 C006 C00A 107.88(17) . . ?
C005 C006 C004 121.47(19) . . ?
C00A C006 C004 130.59(17) . . ?
C00C C007 C004 120.91(19) . . ?
C00C C007 H007 119.5 . . ?
C004 C007 H007 119.5 . . ?
N002 C008 C00A 106.81(17) . . ?
N002 C008 C008 119.3(2) . 5_656 ?
C00A C008 C008 133.9(2) . 5_656 ?
C00D C009 N003 106.62(19) . . ?
C00D C009 C005 128.46(19) . . ?
N003 C009 C005 124.91(17) . . ?
C008 C00A C006 105.52(17) . . ?
C008 C00A C00F 128.56(19) . . ?
C006 C00A C00F 125.91(17) . . ?
C00C C00B C00I 119.95(19) . . ?
C00C C00B H00B 120.0 . . ?
C00I C00B H00B 120.0 . . ?
C00B C00C C007 120.0(2) . . ?
C00B C00C H00C 120.0 . . ?
C007 C00C H00C 120.0 . . ?
C009 C00D C00G 108.35(19) . . ?
C009 C00D H00D 125.8 . . ?
C00G C00D H00D 125.8 . . ?
C004 C00E C00I 120.6(2) . . ?
C004 C00E H00E 119.7 . . ?
C00I C00E H00E 119.7 . . ?
O001 C00F C00A 124.33(18) . . ?
O001 C00F C00J 116.18(19) . . ?
C00A C00F C00J 119.5(2) . . ?
C00H C00G C00D 107.1(2) . . ?
C00H C00G H00G 126.4 . . ?
C00D C00G H00G 126.4 . . ?
N003 C00H C00G 107.9(2) . . ?
N003 C00H H00H 126.0 . . ?
C00G C00H H00H 126.0 . . ?
C00B C00I C00E 120.1(2) . . ?
C00B C00I H00I 119.9 . . ?
C00E C00I H00I 119.9 . . ?
C00F C00J H00A 109.5 . . ?
C00F C00J H00F 109.5 . . ?
H00A C00J H00F 109.5 . . ?
C00F C00J H00J 109.5 . . ?
H00A C00J H00J 109.5 . . ?
H00F C00J H00J 109.5 . . ?
 
loop_
 _geom_torsion_atom_site_label_1
 _geom_torsion_atom_site_label_2
 _geom_torsion_atom_site_label_3
 _geom_torsion_atom_site_label_4
 _geom_torsion
 _geom_torsion_site_symmetry_1
 _geom_torsion_site_symmetry_2
 _geom_torsion_site_symmetry_3
 _geom_torsion_site_symmetry_4
 _geom_torsion_publ_flag
C008 N002 C005 C006 -1.2(2) . . . . ?
C008 N002 C005 C009 -178.87(16) . . . . ?
N002 C005 C006 C00A 0.7(2) . . . . ?
C009 C005 C006 C00A 177.9(2) . . . . ?
N002 C005 C006 C004 177.99(16) . . . . ?
C009 C005 C006 C004 -4.9(3) . . . . ?
C00E C004 C006 C005 93.2(2) . . . . ?
C007 C004 C006 C005 -83.4(3) . . . . ?
C00E C004 C006 C00A -90.3(3) . . . . ?
C007 C004 C006 C00A 93.2(3) . . . . ?
C00E C004 C007 C00C 0.5(3) . . . . ?
C006 C004 C007 C00C 177.17(19) . . . . ?
C005 N002 C008 C00A 1.2(2) . . . . ?
C005 N002 C008 C008 -179.0(2) . . . 5_656 ?
C00H N003 C009 C00D -0.5(2) . . . . ?
C00H N003 C009 C005 -179.13(18) . . . . ?
N002 C005 C009 C00D 12.5(3) . . . . ?
C006 C005 C009 C00D -164.3(2) . . . . ?
N002 C005 C009 N003 -169.09(18) . . . . ?
C006 C005 C009 N003 14.0(3) . . . . ?
N002 C008 C00A C006 -0.7(2) . . . . ?
C008 C008 C00A C006 179.5(3) 5_656 . . . ?
N002 C008 C00A C00F 179.05(19) . . . . ?
C008 C008 C00A C00F -0.7(4) 5_656 . . . ?
C005 C006 C00A C008 0.0(2) . . . . ?
C004 C006 C00A C008 -176.97(19) . . . . ?
C005 C006 C00A C00F -179.78(19) . . . . ?
C004 C006 C00A C00F 3.3(3) . . . . ?
C00I C00B C00C C007 -1.0(3) . . . . ?
C004 C007 C00C C00B 0.6(3) . . . . ?
N003 C009 C00D C00G 0.1(2) . . . . ?
C005 C009 C00D C00G 178.72(19) . . . . ?
C007 C004 C00E C00I -1.2(3) . . . . ?
C006 C004 C00E C00I -177.8(2) . . . . ?
C008 C00A C00F O001 5.7(3) . . . . ?
C006 C00A C00F O001 -174.7(2) . . . . ?
C008 C00A C00F C00J -172.9(2) . . . . ?
C006 C00A C00F C00J 6.8(3) . . . . ?
C009 C00D C00G C00H 0.3(2) . . . . ?
C009 N003 C00H C00G 0.6(2) . . . . ?
C00D C00G C00H N003 -0.5(2) . . . . ?
C00C C00B C00I C00E 0.4(3) . . . . ?
C004 C00E C00I C00B 0.8(3) . . . . ?
 
_refine_diff_density_max    0.266
_refine_diff_density_min   -0.192
_refine_diff_density_rms    0.052

_shelxl_version_number 2013-4

_shelx_res_file
;
TITL pb21_a.res in C2/c
CELL  1.54178  16.0983   8.0852  19.4167   90.000  103.119   90.000
ZERR     4.00   0.0032   0.0016   0.0039    0.000    0.030    0.000
LATT   7
SYMM  - X,   Y, 1/2 - Z
SFAC  C    H    N    O
DISP $C  0.01916  0.00957 85.93609
DISP $H -0.00001  0.00000  0.64302
DISP $N  0.03298  0.01886 166.49108
DISP $O  0.05170  0.03357 293.70081
UNIT 128 104 16 8
MERG   2
FMAP   2
PLAN   20
ACTA
BOND   $H
CONF
LIST   6
L.S.  20
WGHT    0.070800    2.061300
EXTI    0.001115
FVAR       0.46756
O001  4    0.514499   -0.171184    0.362100    11.00000    0.05884    0.03829 =
         0.03122   -0.00076    0.02210   -0.00113
N002  3    0.543156    0.204929    0.523718    11.00000    0.03388    0.03654 =
         0.02296    0.00086    0.01114    0.00238
AFIX  44
H002  2    0.528693    0.225764    0.568854    11.00000   -1.20000
AFIX   0
N003  3    0.643675    0.602317    0.493942    11.00000    0.04174    0.03979 =
         0.03098    0.00148    0.01555    0.00040
AFIX  44
H003  2    0.649405    0.604671    0.449186    11.00000   -1.20000
AFIX   0
C004  1    0.638327    0.331018    0.379251    11.00000    0.03480    0.03430 =
         0.02307    0.00001    0.01197    0.00363
C005  1    0.585783    0.314761    0.490932    11.00000    0.02900    0.03851 =
         0.02557    0.00534    0.00942    0.00557
C006  1    0.596314    0.241752    0.429309    11.00000    0.03101    0.03718 =
         0.02532    0.00439    0.01020    0.00719
C007  1    0.590806    0.439740    0.329544    11.00000    0.03586    0.03731 =
         0.02423    0.00058    0.00950    0.00445
AFIX  44
H007  2    0.529120    0.452619    0.326513    11.00000   -1.20000
AFIX   0
C008  1    0.523478    0.064713    0.486447    11.00000    0.03257    0.03681 =
         0.02522    0.00296    0.00968    0.00525
C009  1    0.612726    0.470508    0.525272    11.00000    0.02873    0.04081 =
         0.02741    0.00310    0.00809    0.00436
C00A  1    0.557106    0.080633    0.424330    11.00000    0.03561    0.03794 =
         0.02504    0.00378    0.01251    0.00699
C00B  1    0.715323    0.511716    0.287684    11.00000    0.04764    0.04219 =
         0.02719   -0.00143    0.01556   -0.00751
AFIX  44
H00B  2    0.742155    0.573739    0.255366    11.00000   -1.20000
AFIX   0
C00C  1    0.629236    0.529946    0.284335    11.00000    0.04711    0.03441 =
         0.02398    0.00062    0.00921    0.00141
AFIX  44
H00C  2    0.596619    0.603339    0.251492    11.00000   -1.20000
AFIX   0
C00D  1    0.614952    0.516552    0.593853    11.00000    0.03836    0.04740 =
         0.02761    0.00128    0.01132    0.00192
AFIX  44
H00D  2    0.596494    0.446652    0.630386    11.00000   -1.20000
AFIX   0
C00E  1    0.725260    0.316181    0.382781    11.00000    0.03718    0.05039 =
         0.03001    0.00631    0.01220    0.00866
AFIX  44
H00E  2    0.758816    0.244743    0.416686    11.00000   -1.20000
AFIX   0
C00F  1    0.553937   -0.038176    0.367426    11.00000    0.04626    0.03672 =
         0.02939    0.00416    0.01654    0.00607
C00G  1    0.647643    0.678971    0.604076    11.00000    0.03849    0.04520 =
         0.03246   -0.00510    0.00900    0.00147
AFIX  44
H00G  2    0.656386    0.741721    0.646663    11.00000   -1.20000
AFIX   0
C00H  1    0.664414    0.729336    0.541311    11.00000    0.03675    0.04024 =
         0.03890   -0.00194    0.00977   -0.00063
AFIX  44
H00H  2    0.686276    0.832724    0.532343    11.00000   -1.20000
AFIX   0
C00I  1    0.763534    0.405683    0.336775    11.00000    0.03553    0.05515 =
         0.03651    0.00162    0.01544    0.00096
AFIX  44
H00I  2    0.823948    0.393418    0.339283    11.00000   -1.20000
AFIX   0
C00J  1    0.602850   -0.003211    0.310883    11.00000    0.08159    0.04044 =
         0.04474   -0.00688    0.04151   -0.00829
AFIX 137
H00A  2    0.592512   -0.090191    0.276334    11.00000   -1.50000
H00F  2    0.662745    0.002426    0.332157    11.00000   -1.50000
H00J  2    0.584270    0.100278    0.288349    11.00000   -1.50000
AFIX   0
HKLF    4

REM  pb21_a.res in C2/c
REM R1 =  0.0527 for    2022 Fo > 4sig(Fo)  and  0.0590 for all    2383 data
REM    184 parameters refined using      0 restraints

END

WGHT      0.0708      2.0613

REM Highest difference peak  0.266,  deepest hole -0.192,  1-sigma level  0.052
Q1    1   0.6780  0.8126  0.6333  11.00000  0.05    0.27
Q2    1   0.5211  0.2400  0.6086  11.00000  0.05    0.24
Q3    1   0.7425  0.4225  0.2992  11.00000  0.05    0.24
Q4    1   0.7839  0.5861  0.3746  11.00000  0.05    0.24
Q5    1   0.7263  0.3040  0.3203  11.00000  0.05    0.19
Q6    1   0.5413  0.1908  0.5579  11.00000  0.05    0.19
Q7    1   0.5947  0.4446  0.2867  11.00000  0.05    0.19
Q8    1   0.6053  0.2873  0.4599  11.00000  0.05    0.18
Q9    1   0.5167  0.1314  0.5973  11.00000  0.05    0.18
Q10   1   0.5250  0.2905  0.5011  11.00000  0.05    0.18
Q11   1   0.6165  0.3550  0.3438  11.00000  0.05    0.17
Q12   1   0.6479  0.1021  0.3494  11.00000  0.05    0.17
Q13   1   0.5552  0.0576  0.4643  11.00000  0.05    0.17
Q14   1   0.7232  0.5719  0.4190  11.00000  0.05    0.17
Q15   1   0.6429  0.0283  0.3533  11.00000  0.05    0.16
Q16   1   0.5000  0.5000  0.5000  10.50000  0.05    0.16
Q17   1   0.5685 -0.0719  0.4594  11.00000  0.05    0.16
Q18   1   0.6718  0.4393  0.4355  11.00000  0.05    0.15
Q19   1   0.6862  0.0877  0.3993  11.00000  0.05    0.15
Q20   1   0.5710  0.4094  0.5868  11.00000  0.05    0.15
;
_shelx_res_checksum    6362

_shelx_hkl_file
;
   0   0   1    2.18    3.89
   0   0   3    0.70    3.52
   0   0  -4  168.66    8.12
   0   0   4  175.70    8.72
   0   0  -5    2.21    4.32
   0   0   5    1.38    3.80
   0   0  -6 2824.00   31.40
   0   0   6 2629.10   31.30
   0   0  -7    2.06    2.58
   0   0   7    2.76    3.00
   0   0  -8 2043.63   27.48
   0   0   8 1849.10   26.35
   0   0  -9    0.71    2.14
   0   0   9    0.65    3.10
   0   0  10  897.81   20.89
   0   0  11    0.30    1.97
   0   0 -11   -2.32    8.49
   0   0 -12    5.36    9.03
   0   0  13   -0.27    2.39
   0   0 -13    3.99    7.45
   0   0  13    1.41    3.28
   0   0  14  200.79    9.23
   0   0  14  215.36    8.85
   0   0 -14  142.68   10.53
   0   0  14  209.26    9.92
   0   0  15    0.62    2.73
   0   0  15    0.88    1.53
   0   0 -15   -0.15    6.40
   0   0  15   -0.28    3.21
   0   0  16    0.24    2.73
   0   0 -16    4.41    5.03
   0   0  17   -0.10    2.23
   0   0  17   -0.21    2.15
   0   0  17    2.57    5.79
   0   0  18    3.18    3.06
   0   0  18    1.96    2.27
   0   0  18   -9.89    5.91
   0   0  19    0.94    2.54
   0   0  19   -0.25    2.12
   0   0  19   -7.02    6.71
   0   0  20  224.59   10.73
   0   0  20  201.64    8.69
   0   0 -20  256.29    9.09
   0   0  21    0.73    2.73
   0   0  21    0.45    1.90
   0   0 -21    1.22    2.26
   0   0  22   29.28    3.83
   0   0 -22   39.95    3.71
   0   0  23    0.06    2.51
   0   2   0 1413.16   25.58
   0  -2   0 1314.18   17.48
   0   2  -1 2933.40   37.24
   0   2   1 2927.17   34.16
   0  -2  -1 3062.10   28.14
   0   2  -2 4228.33  120.31
   0   2   2 4622.65   42.14
   0  -2  -2 4966.63   34.91
   0   2   3 1652.77   25.18
   0  -2  -3 1494.73   18.38
   0   2   4  485.98   13.99
   0  -2  -4  412.96    9.64
   0  -2   5 4056.83   35.72
   0  -2  -5 4133.39   31.43
   0  -2   6  356.70   11.14
   0  -2  -6  422.21   10.51
   0  -2  -7   90.82    6.40
   0  -2   7   72.65    4.96
   0   2   7   89.68    6.76
   0  -2  -7   76.61    4.83
   0  -2  -8  426.81   12.68
   0   2   8  421.27   12.90
   0  -2  -8  414.50   10.88
   0   2   9  565.30   16.06
   0  -2  -9  514.99   13.39
   0   2  10  462.13   14.24
   0  -2 -10  463.50   12.75
   0   2  11   37.47    4.77
   0  -2 -11   35.35    3.76
   0   2  12  104.66    7.19
   0   2  12  102.39    6.74
   0  -2 -12   92.81    5.45
   0  -2  12  108.40    6.96
   0   2  13    2.84    3.09
   0  -2  13    3.09    2.45
   0   2  13    2.85    2.82
   0  -2 -13    4.44    2.35
   0  -2 -13    3.79    2.11
   0  -2 -13    3.53    1.78
   0  -2  13    3.86    5.08
   0  -2 -13    4.48    2.06
   0   2  14   56.27    5.27
   0  -2  14   58.01    5.36
   0   2  14   57.18    4.90
   0  -2  14   57.56    4.26
   0  -2 -14   57.99    4.41
   0  -2 -14   56.05    4.32
   0  -2  14   67.11    8.60
   0  -2 -14   57.67    4.48
   0  -2  15  192.89   10.29
   0   2  15  197.94   11.94
   0  -2  15  217.50    8.89
   0  -2 -15  198.85    8.89
   0  -2 -15  200.09    9.59
   0  -2  15  214.56   12.95
   0  -2 -15  218.74    9.35
   0  -2  16  132.51    8.02
   0  -2  16  147.74    6.99
   0  -2  16  143.60   12.72
   0  -2 -16  155.64    7.69
   0  -2  17   60.56    6.07
   0  -2  17   61.67    4.74
   0  -2  17   49.98   10.44
   0  -2 -17   63.92    4.78
   0  -2  18    0.45    2.43
   0  -2  18    0.13    1.89
   0  -2  18    4.93    9.83
   0  -2 -18    0.43    1.62
   0   2  19    0.13    2.35
   0  -2  19    0.64    2.49
   0  -2  19    0.91    1.90
   0  -2  19    5.48   13.70
   0  -2 -19    0.55    1.83
   0   2  20    1.54    3.16
   0  -2  20    1.19    2.45
   0  -2  20   15.11   10.94
   0  -2 -20    0.65    1.87
   0   2  21    6.70    3.19
   0  -2  21    6.30    2.39
   0  -2  21    3.28    8.94
   0  -2 -21    7.10    2.41
   0   2  22   14.13    3.34
   0  -2  22   14.30    2.60
   0  -2 -22   17.06    3.80
   0   2 -22   16.38    3.68
   0   4   0 1087.69   27.19
   0  -4   0 1120.29   18.62
   0   4   1  598.64   23.25
   0  -4   1  697.50   15.19
   0  -4  -1  592.70   12.35
   0   4   2   26.96    4.14
   0  -4  -2   28.49    3.19
   0   4   3 1186.30   22.73
   0  -4  -3 1139.17   17.16
   0   4   4  122.43    7.36
   0  -4  -4  110.14    5.54
   0   4   5  717.10   19.52
   0  -4  -5  669.84   15.68
   0   4   6  156.06    8.39
   0  -4  -6  154.44    7.63
   0   4   7   67.41    5.92
   0  -4  -7   76.94    5.06
   0   4   8  563.72   16.87
   0  -4  -8  551.85   14.58
   0   4   9  662.45   17.83
   0  -4  -9  618.32   16.42
   0  -4  -9  670.02   16.66
   0  -4   9  697.80   18.02
   0   4  10   42.02    5.18
   0   4  10   38.60    4.56
   0  -4  10   43.16    3.98
   0  -4 -10   49.41    4.65
   0  -4 -10   51.74    4.83
   0  -4 -10   47.18    4.38
   0   4  11 1301.14   35.29
   0  -4  11 1519.29   31.56
   0  -4 -11 1326.96   34.95
   0  -4 -11 1406.01   30.82
   0  -4 -11 1359.02   33.67
   0   4  12  231.66   11.08
   0   4  12  223.91    9.64
   0  -4  12  245.24    8.88
   0  -4 -12  269.83   10.68
   0  -4 -12  208.81   12.59
   0  -4 -12  243.39   10.65
   0   4  13    2.15    3.06
   0   4  13    1.40    2.18
   0  -4  13    3.77    2.35
   0  -4 -13    3.50    2.60
   0  -4 -13    3.18    2.09
   0  -4 -13    2.26    2.06
   0   4  14    2.46    3.22
   0  -4  14    4.56    1.89
   0  -4 -14    4.39    2.52
   0  -4  14    3.70    5.49
   0  -4 -14    3.88    2.24
   0   4  15  143.02    8.92
   0  -4  15  119.00    6.15
   0  -4 -15  153.55    8.73
   0  -4  15  145.92    9.49
   0  -4 -15  142.46    8.05
   0   4  16  130.09    7.78
   0  -4  16  141.24    6.31
   0  -4 -16  140.91    9.67
   0  -4  16  130.13   11.82
   0  -4 -16  131.65    8.02
   0   4  17  170.30   10.26
   0  -4  17  161.66    9.18
   0  -4 -17  175.69   12.03
   0  -4  17  147.89   12.16
   0  -4 -17  174.08   10.93
   0   4  17  153.77    8.85
   0   4  18   73.64    5.94
   0  -4  18   83.08    5.66
   0  -4 -18   88.50    7.16
   0  -4  18   71.12   11.00
   0  -4 -18   87.26    6.87
   0   4  18   75.48    5.52
   0   4  19   89.94    8.20
   0  -4  19   95.14    7.82
   0  -4  19   78.05   12.78
   0  -4 -19   96.83    9.64
   0   4  19   82.13    7.81
   0   4  20   26.47    4.37
   0  -4  20   26.38    3.33
   0  -4  20   22.49   12.65
   0   4  20   23.59    3.46
   0   4  21   52.97    6.41
   0  -4  21   49.65    5.39
   0  -4  21   52.31   10.14
   0  -6   0  146.10    7.97
   0  -6   0  179.65    9.32
   0  -6  -1   39.24    4.07
   0  -6   1   41.72    4.22
   0  -6   1   44.97    4.69
   0  -6  -1   44.17    4.31
   0  -6  -2  187.46    9.83
   0  -6   2  184.36    8.57
   0  -6  -2  147.28   10.84
   0  -6  -2  193.21    8.61
   0  -6   2  202.51   10.01
   0  -6  -2  204.96    9.26
   0  -6  -3  272.16   12.09
   0  -6  -3  253.84   13.56
   0  -6  -3  281.89   11.08
   0  -6   3  313.35   12.99
   0  -6  -3  320.99   12.69
   0  -6   4  239.93    9.98
   0  -6  -4  226.30   11.85
   0  -6  -4  224.64    9.65
   0  -6   4  274.94   11.42
   0  -6  -4  252.46   10.45
   0  -6   5   45.94    4.44
   0  -6  -5   53.12    5.09
   0  -6  -5   39.49    3.68
   0  -6   5   56.02    4.97
   0  -6  -5   45.36    4.32
   0  -6   6    5.97    2.75
   0  -6  -6    4.17    2.21
   0  -6  -6    3.83    1.72
   0  -6   6    4.84    2.06
   0  -6  -6    5.86    2.32
   0  -6   7    2.79    2.26
   0   6   7    3.16    3.13
   0  -6  -7    4.07    2.29
   0  -6  -7    2.39    1.68
   0  -6   7    3.30    2.30
   0  -6  -7    2.63    2.06
   0  -6   8  320.25   13.14
   0   6   8  281.31   16.14
   0  -6  -8  305.85   13.17
   0  -6  -8  251.93   10.76
   0  -6   8  323.49   12.81
   0  -6  -8  319.81   13.17
   0  -6   9  102.61    7.62
   0  -6  -9  105.00    6.89
   0  -6   9  104.85    6.50
   0  -6  -9   94.67    7.07
   0  -6  10  174.69    9.28
   0  -6 -10  175.39    8.80
   0  -6  10  195.09    8.49
   0  -6 -10  169.02    8.86
   0  -6  11    4.20    1.80
   0  -6  11    5.83    2.48
   0  -6 -11    6.49    2.03
   0  -6  12  349.63   10.39
   0  -6  12  438.79   14.62
   0  -6 -12  413.58   12.56
   0   6  12  430.88   13.14
   0  -6  13   28.79    3.09
   0  -6 -13   46.83    5.05
   0  -6  13   41.53    4.74
   0  -6 -13   51.49    4.86
   0   6  13   49.38    5.08
   0  -6  14   23.00    3.25
   0  -6 -14   24.08    3.88
   0  -6  14   23.21    5.81
   0  -6 -14   23.84    3.37
   0   6  14   25.27    4.10
   0  -6  15   39.30    3.80
   0  -6 -15   49.44    4.84
   0  -6 -15   49.26    4.97
   0   6  15   49.16    4.65
   0  -6  16    2.39    1.83
   0  -6 -16    2.67    2.67
   0  -6  17    5.81    2.03
   0  -6 -17    8.33    2.64
   0  -6  18    1.72    1.77
   0  -6 -18    1.78    2.33
   0   6  18    2.48    2.30
   0  -8   0  121.95    7.56
   0  -8   0  127.63    8.74
   0  -8  -1    9.95    4.08
   0  -8   1   13.53    4.68
   0  -8   1   11.97    3.04
   0  -8  -1   12.84    2.97
   0  -8  -2   41.99    5.09
   0  -8   2   52.93    6.07
   0  -8   2   48.97    5.43
   0  -8  -2   49.90    5.14
   0  -8  -3  103.28    6.90
   0  -8   3  125.12    7.74
   0  -8   3  117.54    7.19
   0  -8  -3  129.50    8.73
   0  -8  -4   27.70    4.50
   0  -8   4   33.63    4.29
   0  -8  -4   36.88    6.10
   0  -8   5  123.28    9.03
   0  -8  -5   93.60    8.72
   0  -8   5  112.51    8.64
   0  -8  -5  120.10    8.97
   0  -8   6   70.14    6.74
   0  -8  -6   71.38    6.16
   0  -8   6   72.71    5.97
   0  -8  -6   78.38    6.32
   0  -8   7  197.90   10.63
   0  -8  -7  173.31    9.62
   0  -8   7  192.97   10.45
   0  -8  -7  207.79   11.33
   0  -8   8  205.17   11.54
   0  -8  -8  190.90   10.01
   0  -8   8  184.64   10.05
   0  -8  -8  200.82   10.78
   0  -8   9    6.32    8.79
   0  -8  -9    8.08    2.91
   0  -8   9    8.92    2.91
   0  -8  -9    7.82    2.58
   0  -8  10    0.50   10.56
   0  -8 -10    0.91    2.42
   0  -8  10    0.82    2.72
   0   8 -11   21.78   12.93
   0  -8 -11   20.24    3.68
   0  -8  11   18.48    3.95
   0  -8 -12    1.96    2.48
   0  -8  12   -4.16    4.35
   0  -8 -13    4.26    2.41
   0  -8  13    3.74    5.51
   0  -8 -14    2.51    2.54
  -1   1  23   53.35    6.00
  -1  -1  23   48.83    6.47
   1  -1 -23   69.11    7.01
   1   1 -23   61.16    7.66
  -1   1  22   41.91    5.40
  -1  -1  22   42.64    6.00
  -1  -1  22   38.77    4.83
   1  -1 -22   58.26    6.28
   1   1 -22   51.43    6.31
  -1   1  21   73.81    6.07
  -1  -1  21   76.24    7.23
  -1  -1  21   72.07    5.21
  -1  -1  21   68.36    7.85
   1  -1 -21   88.15    5.79
  -1   1  20  172.75    8.54
  -1  -1  20  178.46    9.68
  -1  -1  20  164.89    7.48
  -1  -1  20  176.16   12.09
   1  -1 -20  208.41    8.20
  -1   1  19   15.84    3.65
  -1  -1  19   19.27    3.50
  -1  -1  19   19.69    3.10
  -1  -1  19   22.42   10.10
   1  -1 -19   19.38    2.90
  -1   1  18  311.51   10.60
  -1  -1  18  306.86   10.76
  -1  -1  18  324.41    9.64
  -1  -1  18  327.02   13.61
   1  -1 -18  361.62   10.94
  -1   1  17   20.37    3.49
  -1  -1  17   22.33    3.33
  -1  -1  17   23.47    2.90
   1  -1 -17   21.02    2.91
  -1   1  17   20.61    4.23
  -1  -1  17   16.52    8.23
  -1   1  16   87.09    6.13
  -1  -1  16   85.21    5.91
  -1  -1  16   90.49    5.29
   1  -1 -16   94.50    6.09
   1   1 -16   61.27   10.08
   1  -1 -16   86.56    5.24
  -1   1  16   86.90    6.44
  -1  -1  16   95.45    7.53
  -1   1  15    9.31    2.70
  -1  -1  15   10.63    3.15
  -1  -1  15   11.05    2.39
   1  -1 -15   11.79    4.37
   1   1 -15    9.67   13.54
   1  -1 -15   11.11    2.12
  -1   1  15    9.59    3.90
  -1  -1  15    8.14    6.79
  -1  -1  14  175.75    9.06
  -1   1  14  180.64    8.91
  -1  -1  14  192.86    7.78
   1  -1 -14  204.33   10.69
   1  -1 -14  177.60    7.84
  -1   1  14  189.17   10.11
  -1  -1  14  195.94    9.81
  -1  -1  13   85.98    5.55
  -1   1  13   86.74    5.81
  -1  -1  13   88.62    4.68
   1  -1 -13   99.49    7.47
  -1   1  13   91.25    6.55
  -1  -1  13   92.27    6.62
  -1   1  12  292.98   11.14
   1  -1 -12  310.69   12.13
  -1   1  11    1.56    3.06
   1  -1 -11    3.52    3.96
  -1   1  10   42.72    4.45
   1  -1 -10   42.67    5.40
   1  -1  -9 1121.24   22.02
  -1   1   9 1063.63   20.07
   1  -1  -9  970.30   18.57
   1  -1  -8    1.90    2.33
  -1  -1   8    1.81    2.57
  -1   1   8    2.54    3.74
   1  -1  -8    1.87    4.44
  -1  -1   7    1.62    2.17
   1  -1  -7    1.19    3.16
  -1   1   7    2.02    3.36
  -1  -1   7    1.62    2.32
   1  -1  -7    1.86    4.25
   1  -1  -6  350.17   11.08
  -1  -1   6  292.40    9.29
  -1   1   6  329.95   11.33
  -1  -1   6  303.89   16.69
   1  -1  -6  306.89   10.97
   1  -1  -5   27.63    4.72
  -1  -1   5   27.47    4.07
  -1   1   5   30.66    5.37
  -1  -1   5   28.86    4.25
   1  -1  -4 4136.60   36.43
  -1   1   4 4119.73   38.47
  -1  -1   4 4262.86   41.01
   1  -1  -3   12.37    4.38
  -1  -1   3   10.17    3.52
   1   1  -2   56.91    5.15
  -1   1   2   59.05    6.30
   1   1  -1  595.32   14.33
  -1   1   1  600.64   16.01
   1  -1  -1  611.61   12.43
   1   1   0   36.58    4.62
  -1   1   0   35.66    5.08
  -1  -1   0   41.85    3.96
   1  -1   0   37.90    3.83
   1   1   1  126.56    7.41
  -1   1  -1  130.30    8.77
   1  -1   1  176.16    7.57
  -1  -1  -1  131.16    6.16
   1  -1   2   81.90    6.01
   1  -1   2   86.17    7.87
  -1  -1  -2   79.60    4.81
   1  -1   3 2361.82   29.66
   1   1   3 2474.72   30.07
  -1  -1  -3 2524.26   27.44
   1  -1   4  537.64   13.90
   1   1   4  621.22   15.56
  -1  -1  -4  610.72   14.79
   1  -1   5  891.11   22.23
   1  -1   6   62.11    4.74
   1   1   6   72.17    6.43
  -1  -1  -6  100.00   19.84
   1  -1   7  270.11    9.25
   1   1   7  305.09   10.84
  -1  -1  -7  224.15    9.58
   1   1   8   15.98    4.11
  -1  -1  -8   12.41    3.47
   1   1   9  811.11   17.74
   1   1  10  604.68   17.42
  -1  -1 -10  538.12   15.23
   1   1  11  121.45    6.76
  -1  -1 -11  121.24    7.79
   1   1  12   26.13    3.80
  -1  -1 -12   25.31    5.45
   1   1  13   10.45    2.82
   1  -1  13    9.89    2.91
   1   1  13    9.67    2.48
   1   1  13   10.87    2.76
   1  -1  13   10.45    2.60
  -1  -1 -13    8.36    4.47
   1   1  13   10.94    4.14
   1  -1  13   12.32    6.10
   1   1  14  115.50    7.28
   1  -1  14  116.39    7.39
   1  -1  14  125.50    6.46
  -1  -1 -14  124.85    7.19
   1   1  14  109.30    7.30
   1  -1  14  118.03    8.98
   1   1  15  139.90    7.88
   1  -1  15  132.05    7.56
   1   1  15  136.50    7.71
   1  -1  15  130.43    7.68
  -1  -1 -15  139.15   10.35
   1   1  15  135.76    8.49
   1  -1  15  125.46    9.18
   1   1  16  257.72   11.45
   1  -1  16  272.28   11.89
   1   1  16  249.15   10.66
   1  -1  16  266.52   10.50
   1   1  16  242.53   12.44
   1  -1  16  261.03   14.58
   1   1  17  101.42    6.73
   1  -1  17  105.98    7.30
   1   1  17   91.29    7.11
   1  -1  17  112.24    6.41
   1  -1  17  109.79   13.45
   1   1  18  200.91    8.86
   1  -1  18  208.07    9.64
   1   1  18  188.94    8.39
   1  -1  18  206.91    7.88
   1  -1  18  197.84   14.30
  -1  -1 -18  214.73   10.36
   1   1  19  217.58    9.19
   1  -1  19  207.56   10.29
   1  -1  19  215.25    8.03
   1  -1  19  222.16   12.06
  -1  -1 -19  222.22   12.89
   1   1  20  333.50   13.79
   1  -1  20  353.36   15.14
   1  -1  20  347.47   10.41
   1  -1  20  320.53   14.88
  -1  -1 -20  375.13   12.32
   1   1  21  261.32   17.94
   1  -1  21  244.31   17.91
   1  -1  21  251.70   16.67
  -1  -1 -21  291.17   16.45
  -1   1 -21  282.72   11.06
   1   1  22   61.57    6.04
   1  -1  22   51.16    5.21
  -1   1 -22   67.47    6.21
  -1   3  22    1.87    2.78
  -1  -3  22    1.72    2.02
  -1  -3  22   -6.28    6.07
  -1   3  21    0.94    2.91
  -1  -3  21    0.52    1.77
  -1  -3  21   -3.86   10.91
   1  -3 -21    1.10    2.02
  -1   3  20   58.57    5.55
  -1  -3  20   64.02    4.91
  -1  -3  20   67.01   13.78
   1  -3 -20   66.95    6.28
  -1   3  20   53.21    5.32
  -1   3  19    8.70    3.06
  -1  -3  19    8.30    2.63
  -1  -3  19    8.21   14.10
   1  -3 -19    9.44    2.27
  -1   3  19    7.87    2.33
  -1   3  18   26.15    3.99
  -1  -3  18   26.77    3.47
   1  -3 -18   26.99    4.93
  -1  -3  18   23.18   10.82
   1  -3 -18   26.38    3.19
  -1   3  17    2.35    3.53
   1  -3 -17    2.29    2.09
  -1  -3  17    7.90   12.43
   1  -3 -17    3.16    2.32
  -1   3  16  323.82   12.13
   1  -3 -16  329.55   15.57
  -1  -3  16  303.80   13.27
   1  -3 -16  328.67   10.20
  -1   3  15  115.33    7.78
   1  -3 -15  120.35    8.28
   1  -3 -15  111.50    6.37
  -1   3  14   24.54    4.37
  -1   3  14   17.15    3.68
  -1  -3  14   26.01    3.27
   1  -3 -14   24.33    3.55
   1  -3 -14   21.47    2.64
   1  -3 -14   22.32    2.78
   1  -3 -14   23.77    2.87
  -1   3  13  111.26    7.56
  -1   3  13  102.04    7.32
  -1  -3  13  130.11    6.50
   1  -3 -13  120.02    7.13
   1  -3 -13   96.03    5.67
   1  -3 -13  111.32    6.25
   1  -3 -13  106.28    6.21
  -1   3  12  166.36    9.37
  -1   3  12  155.46    8.37
  -1  -3  12  157.23    7.42
   1  -3 -12  156.96    8.43
   1  -3 -12  144.73    6.79
   1  -3 -12  149.61    7.23
   1  -3 -12  152.44    7.47
  -1   3  11   20.37    3.96
   1  -3 -11   19.46    3.25
   1  -3 -11   18.37    2.92
  -1  -3  11   26.40    3.47
   1  -3 -11   19.27    2.90
  -1   3  10   60.12    5.45
   1  -3 -10   57.70    4.01
   1  -3  -9 1071.03   20.68
   1  -3  -8  134.90    7.05
   1  -3  -8  143.87    6.55
   1  -3  -7  186.90    8.83
  -1   3   7  200.96   10.63
   1  -3  -7  204.13    7.26
  -1  -3   6  429.87   14.25
  -1   3   6  522.57   14.48
   1  -3  -6  493.03   12.62
  -1   3   5    5.98    3.82
   1  -3  -5    5.49    2.39
  -1   3   4  250.66   10.44
   1  -3  -4  245.41    8.27
  -1   3   3  208.05    9.41
   1  -3  -3  218.86    8.39
   1   3  -2  202.53   13.41
  -1   3   2  207.68   12.03
   1  -3  -2  213.98    7.26
   1   3  -1   36.46    4.38
  -1   3   1   36.72    4.69
  -1  -3   1   44.91    4.14
   1  -3  -1   36.06    3.40
   1   3   0  102.47    7.11
  -1   3   0   98.02    7.69
  -1  -3   0  102.18    5.29
   1  -3   0   86.34    4.57
   1   3   1    9.89    3.88
  -1   3  -1    8.79    4.41
  -1  -3  -1    8.72    2.57
   1   3   2  698.79   18.80
  -1  -3  -2  673.38   13.23
   1   3   3  345.28   15.34
  -1  -3  -3  397.49   10.75
   1   3   4  194.48    9.83
  -1  -3  -4  198.27    7.44
   1   3   5    3.64    3.74
  -1  -3  -5    3.13    2.46
   1   3   6  266.05   10.68
  -1  -3  -6  248.94    8.55
  -1  -3  -7   16.94    2.49
  -1  -3  -8  614.97   14.25
   1   3   9  359.89   12.50
  -1  -3  -9  329.31   10.01
   1   3  10  422.07   14.09
  -1  -3 -10  360.50   10.56
   1   3  11    9.06    3.06
   1   3  11    8.15    3.33
   1  -3  11    9.00    2.14
  -1  -3 -11   12.49    3.09
  -1  -3 -11    9.35    2.39
   1  -3  11    9.64    2.67
  -1  -3 -11    9.77    2.67
   1   3  12  381.27   15.11
   1   3  12  362.00   13.59
   1  -3  12  336.91   11.91
  -1  -3 -12  361.56   13.97
  -1  -3 -12  310.20   10.79
   1  -3  12  420.74   15.54
  -1  -3 -12  323.99   11.83
   1   3  13  391.16   14.71
   1   3  13  335.69   13.32
   1  -3  13  356.21   11.97
  -1  -3 -13  390.14   13.78
  -1  -3 -13  323.21   11.54
   1  -3  13  392.74   14.12
  -1  -3 -13  343.74   12.03
   1   3  14   35.01    4.62
   1   3  14   31.28    4.22
   1  -3  14   41.32    3.98
  -1  -3 -14   40.83    5.20
  -1  -3 -14   32.57    3.90
   1  -3  14   36.14    7.44
  -1  -3 -14   31.59    3.96
   1   3  15  332.17   12.31
   1  -3  15  304.43    9.61
  -1  -3 -15  328.88   17.04
   1  -3  15  301.49   11.80
  -1  -3 -15  269.99   12.32
   1   3  16  389.16   15.54
   1  -3  16  373.52   13.35
   1  -3  16  353.90   17.33
  -1  -3 -16  350.51   14.48
   1   3  16  351.52   14.19
   1   3  17   19.91    3.76
   1  -3  17   18.65    3.28
   1  -3  17   12.63   10.47
  -1  -3 -17   22.61    3.04
   1   3  17   19.03    3.21
   1   3  18  426.11   13.29
   1  -3  18  419.92   17.92
   1   3  18  428.95   14.61
   1  -3  19    2.98   14.05
  -1  -3 -19    8.20    2.20
   1   3  19    8.46    2.52
   1  -3  20   17.18   12.25
   1  -3  21    1.01    2.02
   1  -3  21   -1.89    8.42
   1  -3  22   12.78    2.75
  -1  -5  20   14.55    2.64
  -1   5  20   16.38    2.88
  -1   5  19   12.87    3.65
  -1  -5  19   12.78    2.61
   1  -5 -19   13.54    3.04
   1  -5 -19   14.39    2.72
  -1   5  19   13.44    2.90
  -1   5  18   11.09    3.58
  -1  -5  18    9.98    2.61
   1  -5 -18   11.64    2.84
   1  -5 -18   11.17    2.57
  -1   5  18   10.79    2.87
  -1   5  17    8.37    3.24
  -1  -5  17    8.09    2.14
   1  -5 -17   10.10    2.95
  -1  -5  17   10.76   11.31
   1  -5 -17   12.14    2.69
  -1   5  17    9.62    2.87
  -1   5  16   95.10    7.36
  -1  -5  16   93.95    5.26
   1  -5 -16   97.99    6.93
  -1  -5  16  103.17   10.78
   1  -5 -16  113.89    6.59
  -1   5  15    4.11    3.19
  -1  -5  15    3.83    2.09
   1  -5 -15    5.18    2.91
  -1  -5  15   -2.36    6.43
   1  -5 -15    5.23    2.42
  -1   5  14   51.85    6.06
  -1  -5  14   57.92    3.96
   1  -5 -14   67.02    5.86
  -1  -5  14   68.30    6.74
   1  -5 -14   64.26    4.97
  -1   5  13  100.74    8.85
  -1  -5  13  114.37    6.22
   1  -5 -13  123.14    7.08
  -1  -5  13  123.97    8.08
   1  -5 -13  125.90    8.55
  -1   5  12   43.16    6.00
  -1  -5  12   49.62    4.01
   1  -5 -12   56.58    5.12
  -1  -5  12   54.77    4.84
   1  -5 -12   56.24    4.88
  -1   5  11   28.65    4.13
  -1  -5  11   36.17    3.40
   1  -5 -11   32.78    3.44
  -1  -5  11   41.22    4.83
   1  -5 -11   37.49    3.65
  -1   5  10   33.60    4.59
   1  -5 -10   41.74    4.11
   1  -5 -10   34.15    4.72
  -1  -5  10   39.43    4.05
   1  -5 -10   36.15    5.06
  -1  -5   9  286.34   12.43
  -1   5   9  236.99   12.07
   1  -5  -9  287.87   11.37
   1  -5  -9  264.03   10.38
  -1  -5   9  301.52   12.80
   1  -5  -9  280.18   10.72
  -1  -5   8  130.46    7.54
  -1   5   8  100.22    7.42
   1  -5  -8  108.15    6.61
   1  -5  -8  102.71    6.98
  -1  -5   8  118.75    7.62
   1  -5  -8  120.35    6.74
  -1  -5   7  101.72    7.10
  -1   5   7   97.07    6.99
   1  -5  -7   89.94    5.97
   1  -5  -7   85.73    5.63
  -1  -5   7   96.14    6.73
   1  -5  -7   92.36    5.66
  -1  -5   6  374.06   12.50
  -1   5   6  327.63   13.32
   1  -5  -6  301.50   11.15
   1  -5  -6  275.47    8.85
  -1  -5   6  355.11   12.69
   1  -5  -6  303.92   10.04
  -1   5   5    8.92    3.40
   1  -5  -5    8.37    1.83
  -1   5   4   11.97    3.24
   1  -5  -4   10.07    2.08
  -1   5   3  278.19   12.52
   1  -5  -3  237.85    7.99
   1  -5  -2  126.41    5.69
   1  -5  -1   18.41    2.84
   1  -5   0    4.69    1.94
  -1  -5  -1   13.05    2.75
   1   5   2    5.27    2.87
  -1  -5  -2    4.34    1.71
   1   5   3   10.72    3.30
  -1  -5  -3    9.49    1.93
   1   5   4    5.63    2.98
  -1  -5  -4    4.63    1.57
   1  -5   5    2.08    1.77
   1   5   5    2.20    2.92
  -1  -5  -5    2.67    2.21
  -1  -5  -5    2.12    1.78
   1  -5   5    2.45    1.81
   1  -5   6  239.93    9.92
   1   5   6  230.55   10.39
  -1  -5  -6  208.29    8.66
  -1  -5  -6  202.51    7.51
   1  -5   6  245.54    9.37
  -1  -5  -6  218.36    9.00
   1  -5   7   66.20    5.81
   1   5   7   64.72    5.81
  -1  -5  -7   56.85    5.15
  -1  -5  -7   58.69    4.77
  -1  -5  -7   66.68    5.29
   1   5   8  148.23    9.21
   1  -5   8  182.43    9.71
   1   5   8  145.95    8.88
  -1  -5  -8  167.30    8.91
  -1  -5  -8  184.70    9.16
   1   5   9   23.95    4.35
   1  -5   9   30.50    3.88
   1   5   9   25.70    3.74
  -1  -5  -9   21.74    2.84
  -1  -5  -9   23.41    3.01
   1   5  10  417.56   17.34
   1   5  10  424.94   16.35
   1  -5  10  423.40   15.35
  -1  -5 -10  478.17   16.99
  -1  -5 -10  454.40   16.58
   1   5  11  529.00   19.94
   1  -5  11  530.95   17.00
  -1  -5 -11  589.27   19.69
   1  -5  11  593.59   20.64
  -1  -5 -11  611.02   19.78
   1   5  12   11.43    3.46
   1  -5  12    9.80    2.05
  -1  -5 -12   15.59    3.56
   1  -5  12   13.99    3.43
  -1  -5 -12   12.35    2.98
   1   5  13    6.62    3.79
   1  -5  13    7.19    1.93
  -1  -5 -13    6.98    2.54
   1  -5  13   10.02    3.28
  -1  -5 -13    6.10    1.96
   1   5  14   38.14    5.18
   1  -5  14   33.58    3.53
  -1  -5 -14   37.58    4.50
   1  -5  14   35.48    5.98
  -1  -5 -14   40.53    3.92
   1   5  15   37.76    5.27
   1  -5  15   27.93    3.09
  -1  -5 -15   35.35    4.08
   1  -5  15   25.27    7.38
   1   5  15   34.55    3.88
   1   5  16    1.66    3.44
   1  -5  16    1.29    2.05
  -1  -5 -16    0.48    2.54
   1  -5  16   -7.22    8.76
   1   5  16    1.04    2.00
   1   5  17   15.19    4.16
   1  -5  17   12.41    2.58
  -1  -5 -17   13.85    3.13
   1  -5  17    9.55   10.41
   1   5  17   13.76    3.12
   1   5  18   89.38    9.89
   1  -5  18   80.09    8.08
  -1  -5 -18   86.04   10.20
   1  -5  18   73.72   13.60
   1   5  18   81.26    8.61
   1   5  19   11.89    3.52
   1  -5  19   14.58    2.55
   1  -5  19   15.23   11.88
   1   5  19   12.72    2.75
   1  -7 -16   23.83    4.26
  -1  -7  16   19.94    9.09
  -1   7  16   26.53    4.44
  -1  -7  15    9.99    8.57
  -1   7  15   11.67    3.15
   1  -7 -14   45.12    5.83
  -1  -7  14   42.85    7.56
   1  -7 -14   56.79    6.61
  -1   7  14   52.80    6.09
   1  -7 -13   60.22    5.33
  -1  -7  13   53.29    6.22
   1  -7 -13   47.91    5.89
  -1   7  13   48.48    4.72
   1  -7 -12   56.61    5.30
  -1  -7  12   45.94    4.80
   1  -7 -12   47.90    4.88
  -1   7  12   51.82    5.00
  -1  -7  11   12.53   10.27
   1  -7 -11   13.96    3.49
  -1  -7  11   11.21    2.87
   1  -7 -11   14.64    2.60
  -1   7  11   14.24    3.49
  -1  -7  10   -3.34    7.94
   1  -7 -10   -0.10    2.14
  -1  -7  10    0.27    2.92
   1  -7 -10   -0.04    2.02
  -1   7  10    0.50    2.67
  -1  -7   9    4.54    7.14
   1  -7  -9    3.92    2.36
  -1  -7   9    3.56    2.82
   1  -7  -9    5.17    2.09
  -1   7   9    3.61    2.58
  -1  -7   8   73.82    6.64
   1  -7  -8   88.04    6.43
  -1  -7   8   89.29    6.44
   1  -7  -8   89.13    6.00
  -1  -7   7   88.65    6.95
   1  -7  -7   94.35    7.41
  -1  -7   7  100.92    7.81
   1  -7  -7  100.07    6.55
  -1  -7   6  115.58    7.69
   1  -7  -6  100.28    8.30
  -1  -7   6  114.38    8.49
   1  -7  -6  114.93    6.95
  -1  -7   5   13.26    4.42
   1  -7  -5   10.01    3.15
  -1  -7   5   14.08    3.27
   1  -7  -5   14.83    3.59
   1  -7  -4    7.68    2.82
  -1  -7   4   10.24    3.01
   1  -7  -4    5.54    2.57
  -1  -7   3   88.37    6.40
   1  -7  -3   73.86    5.78
  -1  -7   3   92.44    6.43
   1  -7  -3   92.72    6.40
  -1  -7   2  197.59    9.68
   1  -7  -2  174.36    9.61
  -1  -7   2  213.74   12.13
   1  -7  -2  197.30    9.29
  -1  -7   1    4.38    2.79
   1  -7  -1    4.19    2.20
  -1  -7   1    4.86    2.23
   1  -7  -1    4.34    2.15
  -1  -7   0   42.72    4.51
   1  -7   0   44.13    4.41
  -1  -7   0   54.03    5.24
   1  -7   0   49.35    4.39
  -1  -7  -1  140.07    8.08
   1  -7   1  160.93    8.55
   1  -7   1  164.94    8.64
  -1  -7  -1  166.04    9.92
  -1  -7  -2   91.83    7.07
   1  -7   2  118.41    7.17
  -1  -7  -2   85.37    7.91
   1  -7   2  111.98    7.59
  -1  -7  -2  127.51    9.04
  -1  -7  -3  188.72   11.28
  -1  -7  -3  190.62   10.82
   1  -7   3  226.97   10.38
  -1  -7  -3  247.84   13.20
   1  -7   4   75.01    5.15
  -1  -7  -4   63.22    5.91
   1  -7   4   81.70    5.69
  -1  -7  -4   77.09    6.41
   1  -7   5   29.58    3.86
  -1  -7  -5   30.51    4.13
   1  -7   5   32.95    3.83
  -1  -7  -5   32.44    3.73
   1  -7   6   16.76    3.58
  -1  -7  -6   18.72    3.33
   1  -7   6   19.08    3.30
  -1  -7  -6   17.21    3.19
   1  -7   7  267.07   10.54
  -1  -7  -7  264.77   11.67
   1  -7   7  279.50   11.12
  -1  -7  -7  276.57   11.71
   1  -7   8   11.58    4.32
  -1  -7  -8   10.84    3.37
   1  -7   8    9.58    2.57
  -1  -7  -8    8.46    2.57
   1   7   8   10.47    3.37
   1  -7   9   72.42    6.83
  -1  -7  -9   70.57    6.32
   1  -7   9   77.44    5.97
   1   7   9   73.45    6.76
   1  -7  10   60.12    7.81
  -1  -7 -10   53.46    5.20
   1  -7  10   57.64    5.08
   1   7  10   52.20    6.43
   1  -7  11   10.27    7.91
  -1  -7 -11    9.34    2.92
   1  -7  11    8.67    2.51
   1   7  11    9.68    3.04
   1  -7  12   22.83    4.17
   1   7  12   29.81    4.38
   1   7  13  327.69   12.14
  -1  -7 -14    5.33    2.66
   1   7  14    4.86    2.88
  -1  -7 -15   24.88    3.82
   1   7  15   26.22    3.73
  -1  -7 -16    9.35    2.63
   1   7  16    8.02    2.79
   1   9  -9   22.95   11.06
  -1  -9   9    4.31    3.62
   1   9  -8   31.73   15.26
  -1  -9   8   23.12    4.32
   1   9  -7   14.85   17.52
  -1  -9   7    0.39    2.21
   1  -9  -7    1.43    2.17
  -1  -9   6    0.37    2.21
   1  -9  -6    0.56    2.06
  -1  -9   5    1.89    2.17
   1  -9  -5    2.02    2.29
  -1  -9   4    9.22    9.53
  -1  -9   4    3.73    2.33
   1  -9  -4    2.66    2.48
  -1  -9   3   34.13    9.83
  -1  -9   3   29.65    4.75
   1  -9  -3   34.28    5.58
  -1  -9   2   48.18    9.23
   1  -9  -2   45.92    6.16
  -1  -9   2   43.47    5.85
   1  -9  -2   49.23    6.16
   1  -9  -1   42.08    6.89
  -1  -9   1   37.62    5.85
   1  -9  -1   43.81    5.43
   1  -9   0    4.01    5.95
   1   9   0   35.19   21.08
  -1  -9   0    1.51    2.66
   1  -9   1    1.68    6.93
   1   9   1    5.18   17.19
   1  -9   1    0.31    2.30
   1  -9   2   -1.22    6.34
   1  -9   2    0.83    2.23
   1  -9   3   24.85    8.39
   1  -9   3   23.35    3.82
   1  -9   4   -3.74    8.25
   1  -9   4    0.42    2.17
   1  -9   5    6.25    2.42
   1  -9   6   -4.48    9.29
  -1  -9  -6    0.62    1.86
   1  -9   6    0.64    2.21
   1  -9   7    2.17   10.20
  -1  -9  -7    0.89    1.90
   1  -9   7    0.27    2.17
  -1   9  -8   16.24   14.54
  -1  -9  -8   17.22    3.56
   1  -9   8   18.25    3.41
  -1   9  -9    3.04   12.28
  -1  -9  -9    1.50    1.93
  -2   0  23    0.13    2.42
   2   0 -23    0.36    2.17
  -2   0  22  160.32   14.62
   2   0 -22  199.63   17.03
  -2   0  21    0.49    2.81
   2   0 -21    0.52    2.46
  -2   0  20  633.99   15.43
  -2   0  20  604.93   18.37
  -2   0  19    9.84    3.13
  -2   0  19    9.23    2.72
   2   0 -19   13.39    2.76
  -2   0  19   -0.56    4.26
  -2   0  18 2358.17   28.25
  -2   0  18 2321.88   61.10
   2   0 -18 2170.92   59.76
  -2   0  18 2364.27   30.76
  -2   0  17    2.54    2.30
  -2   0  17    5.14    2.06
   2   0 -17    4.31    1.90
  -2   0  17    4.02    3.43
  -2   0  16   32.44    3.98
  -2   0  16   32.22    3.44
   2   0 -16   34.37    7.87
  -2   0  16   34.27    4.83
  -2   0  15    3.52    2.11
  -2   0  15    3.39    2.00
   2   0 -15    4.74    9.86
  -2   0  15    2.38    4.01
  -2   0  14  998.87   25.77
  -2   0  14 1024.91   25.40
  -2   0  14 1074.58   28.34
  -2   0  12  858.22   20.36
  -2   0  11   -0.01    1.80
  -2   0  10    1.65    2.79
  -2   0   9    1.04    2.97
  -2   0   8 1179.83   20.53
  -2   0   7    4.88    3.13
  -2   0   6  122.25    7.48
  -2   0   5    1.08    4.20
  -2   0   4 5339.72   41.44
  -2   0   4 5426.37   43.52
  -2   0   3    1.90    3.99
  -2   0   2    4.72    4.11
   2   0  -2    0.62    3.49
   2   0  -1   10.23    4.75
   2   0   0 1969.34   24.30
   2   0   1   15.96    4.22
   2   0   2 9999.00   59.46
   2   0   3    6.38    3.93
   2   0   4 2596.30   28.88
   2   0   5    2.61    2.84
  -2   0  -6 1234.85   21.60
   2   0   6 1111.13   19.63
  -2   0  -7    6.16    3.43
   2   0   7    6.30    3.09
  -2   0  -8   10.78    3.46
   2   0   8    9.22    2.70
  -2   0  -9   -0.37    2.66
   2   0   9    0.55    2.43
   2   0  10  119.65    6.47
  -2   0 -11    0.59    5.55
  -2   0 -12   39.37    7.54
   2   0  13   -0.03    1.96
   2   0  13    0.03    1.53
  -2   0 -13    2.94    7.13
   2   0  13    0.76    4.57
   2   0  14    4.14    2.72
   2   0  14    3.61    2.42
  -2   0 -14    0.77    7.28
   2   0  14    2.63    5.69
   2   0  15    1.68    2.26
   2   0  15    2.88    1.93
  -2   0 -15    1.40    6.25
   2   0  15   -4.99    6.90
   2   0  16  485.31   17.31
   2   0  16  457.02   15.13
   2   0  16  443.75   17.09
   2   0  17    0.91    2.95
   2   0  17    1.04    1.84
   2   0  17   -9.29    6.56
   2   0  18   16.66    3.50
   2   0  18   15.07    2.92
   2   0  18    9.03    7.62
   2   0  19    0.52    2.26
   2   0  19    0.25    2.09
  -2   0 -19    0.77    2.17
   2   0  20   27.05    4.16
   2   0  20   27.68    3.36
  -2   0 -20   34.50    4.75
   2   0  21    0.16    2.46
   2   0  21   -0.27    1.89
  -2   0 -21   -0.19    1.83
   2   0  22   10.20    3.03
   2   0  22   10.23    2.63
   2  -2 -23  104.40    9.25
   2   2 -23   98.82    8.70
  -2   2  22   51.91    5.00
  -2  -2  22   46.59    5.79
  -2  -2  22   46.47    4.20
  -2  -2  22   29.56    7.41
   2  -2 -22   68.43    4.84
  -2   2  21   73.43    6.87
  -2  -2  21   66.84    7.23
  -2  -2  21   68.83    6.62
  -2  -2  21   76.52   11.61
   2  -2 -21   90.69    7.57
  -2   2  20    4.02    2.75
  -2  -2  20    5.05    2.87
  -2  -2  20    5.00    2.05
  -2  -2  20    3.58   12.04
   2  -2 -20    6.15    2.57
  -2   2  19  215.86   11.25
  -2  -2  19  190.55   11.15
  -2  -2  19  204.27    9.84
  -2  -2  19  203.73   14.86
   2  -2 -19  224.98   11.21
  -2   2  18   67.27    5.73
  -2  -2  18   54.56    4.65
  -2  -2  18   65.92    4.50
   2  -2 -18   65.56    5.40
  -2  -2  18   53.36    9.16
   2  -2 -18   76.06    4.97
  -2   2  17  182.98    9.78
  -2  -2  17  173.22    9.32
  -2  -2  17  190.13    8.09
   2  -2 -17  199.50   12.90
   2  -2 -17  187.30    8.64
   2  -2 -17  201.16    9.50
  -2   2  16  182.92    9.62
  -2  -2  16  154.93    8.25
  -2  -2  16  169.05    7.51
   2  -2 -16  181.19   10.07
   2  -2 -16  167.48    8.09
   2  -2 -16  178.05    8.66
  -2   2  15   28.21    3.98
  -2  -2  15   23.40    3.22
  -2   2  15   23.93    3.70
  -2  -2  15   26.44    3.03
   2  -2 -15   27.73    3.64
   2  -2 -15   25.14    3.40
   2  -2 -15   25.00    2.88
   2  -2 -15   26.59    3.39
  -2   2  14   46.58    5.06
  -2  -2  14   45.57    4.45
  -2   2  14   44.56    4.78
  -2  -2  14   49.69    3.79
   2  -2 -14   47.47    4.26
   2  -2 -14   45.05    3.80
   2  -2 -14   46.28    3.98
   2  -2 -14   48.65    4.01
  -2   2  13  467.30   14.82
  -2  -2  13  421.54   15.35
  -2   2  13  444.05   13.48
  -2  -2  13  506.95   12.69
   2  -2 -13  445.77   13.15
   2  -2 -13  446.71   12.13
   2  -2 -13  433.31   12.10
  -2  -2  13  481.20   14.24
   2  -2 -13  452.70   12.34
  -2   2  12    3.55    2.87
   2  -2 -12    4.84    2.58
  -2   2  11   72.96    5.46
   2  -2 -11   75.54    4.91
  -2   2  10    0.01    3.56
   2  -2 -10    1.01    2.43
   2  -2  -9  169.21    8.21
  -2   2   9  151.99    7.75
   2  -2  -9  155.33    6.84
   2  -2  -8    5.54    2.32
  -2   2   8    5.02    2.76
  -2  -2   7  586.22   14.58
  -2   2   7  607.46   15.32
   2  -2  -6 1633.30   23.41
   2  -2  -5  169.88    7.84
  -2   2   5  178.74    8.79
  -2  -2   5  166.57    9.12
   2  -2  -4  503.50   16.32
  -2   2   4  521.92   15.17
  -2  -2   4  489.84   16.52
   2  -2  -3 1427.76   27.59
   2   2  -3 1549.43   23.25
  -2   2   3 1545.45   27.97
   2  -2  -3 1415.93   17.99
   2   2  -2   52.20    5.06
  -2   2   2   38.22    5.55
   2  -2  -2   45.28    4.35
   2   2  -1  277.69   10.27
  -2   2   1  283.76   11.34
   2  -2  -1  295.41    8.69
   2   2   0   22.08    4.38
  -2   2   0   20.19    4.68
  -2  -2   0   23.98    3.31
   2  -2   0   21.32    3.22
   2   2   2  883.66   20.65
  -2   2  -2  922.11   24.69
   2   2   3  291.09   10.63
  -2   2  -3  248.41   27.79
  -2  -2  -3  307.16    8.97
  -2  -2  -4 3568.55   29.50
  -2  -2  -5    9.09    2.36
   2   2   6  527.58   14.22
  -2  -2  -6  455.12   11.46
   2   2   7  237.98    9.77
  -2  -2  -7  214.67    7.65
   2   2   8   44.41    4.99
  -2  -2  -8   40.38    3.88
   2   2   9  502.60   14.76
  -2  -2  -9  442.19   13.85
   2   2  10   56.06    5.18
  -2  -2 -10   54.07    4.32
   2   2  11  203.58   10.08
   2   2  11  210.26    9.25
  -2  -2 -11  183.82    7.54
   2   2  12    1.80    3.31
   2   2  12    0.68    1.53
   2  -2  12    0.59    2.23
   2  -2  12   -1.19    3.12
   2   2  13    2.84    2.66
   2   2  13    3.13    2.18
   2   2  13    2.69    1.96
   2  -2  13    4.07    2.41
  -2  -2 -13    3.33    2.03
   2  -2  13    1.59    5.66
  -2  -2 -13    4.02    2.00
   2   2  14  239.44   10.85
   2   2  14  220.02    9.87
   2   2  14  196.84    9.53
   2  -2  14  225.59    8.66
   2  -2  14  236.20   12.20
  -2  -2 -14  213.47    9.04
   2   2  14  214.08    9.23
   2   2  15    5.73    3.36
   2   2  15    5.49    2.21
   2  -2  15    4.32    8.06
  -2  -2 -15    5.61    2.18
   2   2  15    5.92    2.54
   2   2  16    5.76    3.53
   2  -2  16   15.20   11.24
  -2  -2 -16    5.11    1.78
   2   2  16    5.39    2.02
   2   2  17   -0.21    2.51
   2  -2  17   -2.76   12.86
  -2  -2 -17    0.30    1.43
   2   2  18   29.40    4.42
   2  -2  18   28.40    3.40
   2  -2  18   34.82   13.53
   2   2  19    0.24    2.23
   2  -2  19    0.28    1.87
   2  -2  19    7.85   12.20
   2   2  20    0.53    2.92
   2  -2  20    1.26    2.24
   2  -2  20   10.05    9.62
   2   2  21    0.68    2.55
   2  -2  21    1.01    2.00
   2   2  22    1.51    2.72
   2  -2  22    1.08    2.14
  -2   4  21   12.47    3.47
   2  -4 -21   15.60    3.01
  -2   4  21   10.84    2.51
  -2   4  20   30.76    4.99
   2  -4 -20   32.56    5.30
   2  -4 -20   36.61    4.69
  -2   4  20   28.82    4.60
  -2   4  19   36.30    4.75
   2  -4 -19   39.36    5.21
  -2  -4  19   40.44   10.99
   2  -4 -19   47.10    4.90
  -2   4  19   35.62    4.04
  -2   4  18    2.57    2.87
  -2  -4  18    3.13    2.12
   2  -4 -18    4.66    2.60
  -2  -4  18    3.07   11.34
   2  -4 -18    3.47    2.14
  -2   4  17  252.31   13.51
  -2  -4  17  253.04   11.09
   2  -4 -17  250.65   12.37
  -2  -4  17  250.89   16.51
   2  -4 -17  275.41   12.31
  -2   4  16   12.41    3.77
  -2  -4  16   15.59    2.81
   2  -4 -16   17.53    3.04
  -2  -4  16    9.98    9.40
   2  -4 -16   19.24    3.22
  -2   4  15 1125.78   35.13
  -2  -4  15 1179.07   32.40
   2  -4 -15 1118.45   34.16
  -2  -4  15 1143.84   32.47
   2  -4 -15 1262.63   34.80
  -2   4  14   13.57    3.73
  -2  -4  14   19.72    3.22
   2  -4 -14   22.34    3.31
  -2  -4  14   14.37    5.92
   2  -4 -14   20.83    3.31
  -2   4  13  307.25   15.29
  -2   4  13  300.86   12.52
  -2  -4  13  352.40   13.67
   2  -4 -13  307.72   12.83
   2  -4 -13  333.42   13.66
  -2  -4  13  349.25   14.30
   2  -4 -13  338.59   12.44
  -2   4  12  302.17   14.49
   2  -4 -12  321.92   12.74
   2  -4 -12  338.26   12.62
  -2  -4  12  379.03   14.89
   2  -4 -12  344.14   13.01
  -2   4  11   10.29    3.22
  -2   4  11   10.36    2.84
   2  -4 -11   13.50    2.52
  -2  -4  11   12.32    2.81
   2  -4 -11   14.37    2.49
  -2   4  10  168.08    8.63
   2  -4 -10  175.43    8.27
  -2  -4  10  181.51    9.89
   2  -4 -10  166.67    7.69
  -2   4   9 1232.24   27.44
   2  -4  -9 1186.77   24.22
   2  -4  -9 1224.74   23.73
   2  -4  -9 1150.82   22.66
  -2   4   8  261.35   12.58
   2  -4  -8  296.02   10.47
  -2   4   7  417.72   14.51
   2  -4  -7  400.55   11.64
  -2   4   6   27.27    4.44
   2  -4  -6   27.24    2.97
  -2   4   5  131.06    8.69
   2  -4  -5  119.73    6.38
  -2   4   4  613.87   18.08
   2  -4  -4  548.50   14.36
  -2   4   3  255.24   12.00
   2  -4  -3  217.85    7.82
  -2   4   2   73.29    6.77
   2   4  -1   35.32    4.60
  -2   4   1   28.92    4.99
   2   4   0   34.92    4.77
  -2  -4   0   37.43    3.98
   2   4   1   30.93    4.45
  -2  -4  -1   35.02    3.95
   2   4   2   91.80    7.16
  -2  -4  -2   88.92    5.95
   2   4   3   25.31    4.32
  -2  -4  -3   25.11    3.90
   2   4   4  971.12   23.65
  -2  -4  -4  921.44   19.82
   2   4   5   28.92    4.53
  -2  -4  -5   27.16    4.39
   2   4   6  156.73    8.06
  -2  -4  -6  159.47    8.14
   2   4   7  292.25   11.64
  -2  -4  -7  284.77   10.10
   2   4   8  101.67    6.47
  -2  -4  -8  110.12    6.64
  -2  -4  -8  100.53    6.09
   2  -4   8  109.56    6.93
   2   4   9   59.66    5.55
   2   4   9   63.40    5.63
   2  -4   9   57.25    5.51
  -2  -4  -9   64.79    4.97
  -2  -4  -9   67.21    5.27
   2  -4   9   66.52    5.45
   2   4  10  108.22    7.79
   2  -4  10  100.77    6.12
  -2  -4 -10  110.17    7.23
   2  -4  10  118.96    8.27
   2   4  11   15.11    4.14
   2   4  11   15.10    3.53
   2  -4  11   13.82    2.35
  -2  -4 -11   15.54    3.25
   2  -4  11   17.85    3.13
   2   4  12   13.01    4.25
   2   4  12    8.02    2.75
   2  -4  12    8.23    2.18
  -2  -4 -12   12.23    3.40
   2  -4  12   10.45    2.90
   2   4  13    5.89    3.58
   2  -4  13    6.10    2.06
  -2  -4 -13    7.39    2.82
   2  -4  13    4.84    4.59
   2   4  13    6.59    3.03
   2   4  14  206.89   11.02
   2  -4  14  181.70    8.66
  -2  -4 -14  212.92   12.68
   2  -4  14  197.69   10.75
   2   4  14  174.44    9.55
   2   4  15    5.88    3.90
   2  -4  15    5.89    2.41
  -2  -4 -15    6.22    2.55
   2  -4  15   -5.33    6.87
   2   4  15    5.02    3.01
   2   4  16   14.92    4.01
   2  -4  16   11.86    2.85
  -2  -4 -16   13.69    3.37
   2  -4  16   13.48   10.57
   2   4  16   14.80    3.31
   2   4  17   35.77    4.99
   2  -4  17   35.87    3.88
   2  -4  17   35.83   12.83
   2   4  17   34.99    3.85
   2   4  18    3.22    3.09
   2  -4  18    3.33    2.38
   2  -4  18    3.22   11.65
   2   4  18    3.58    2.42
   2   4  19   18.89    4.29
   2  -4  19   16.60    3.12
   2  -4  19   16.32   11.39
   2   4  19   16.39    3.16
   2   4  20    1.47    2.92
   2  -4  20    2.61    2.00
   2  -4  20    3.85   10.60
  -2  -6  19   13.11    9.75
  -2   6  19   14.89    3.25
  -2  -6  18    6.95    2.11
   2  -6 -18    8.61    3.10
  -2  -6  18    4.10   10.78
   2  -6 -18    9.21    2.52
  -2  -6  17   51.59    5.98
   2  -6 -17   66.13    7.47
  -2  -6  17   48.62   11.58
   2  -6 -17   63.35    7.35
  -2  -6  16    6.06    2.03
   2  -6 -16    7.87    3.09
  -2  -6  16   -5.08    8.55
   2  -6 -16    5.23    2.14
  -2   6  16    5.57    2.82
  -2  -6  15   50.99    3.83
   2  -6 -15   55.83    5.34
  -2  -6  15   46.50    8.27
   2  -6 -15   63.86    5.12
  -2  -6  14  115.48    6.03
  -2  -6  14  130.86    7.79
   2  -6 -14  152.23    7.78
  -2  -6  13    3.70    1.93
   2  -6 -13    4.22    3.01
  -2  -6  13    1.35    4.38
   2  -6 -13    3.80    2.00
  -2  -6  12    1.47    1.51
   2  -6 -12    2.48    2.95
  -2  -6  12    1.40    2.91
   2  -6 -12    2.42    1.93
  -2  -6  11   26.29    9.58
  -2  -6  11   16.26    2.66
   2  -6 -11   18.80    3.55
  -2  -6  11   18.10    3.18
   2  -6 -11   22.00    3.15
  -2  -6  10  519.99   18.83
   2  -6 -10  452.64   16.36
  -2  -6  10  515.20   16.48
   2  -6 -10  502.25   12.35
  -2  -6   9   13.01    6.13
   2  -6  -9    9.72    3.10
  -2  -6   9    9.75    3.41
   2  -6  -9   11.37    2.58
  -2  -6   8    7.82    4.90
  -2   6   8    4.45    2.48
   2  -6  -8    6.10    2.91
   2  -6  -8    3.88    1.72
  -2  -6   8    6.40    2.78
   2  -6  -8    5.37    2.38
  -2  -6   7  587.72   19.81
   2  -6  -7  559.16   19.29
  -2  -6   7  546.31   20.70
   2  -6  -7  510.15   17.18
  -2  -6   6  185.50    9.49
   2  -6  -6  170.44    8.72
   2  -6  -6  141.27    6.70
  -2  -6   6  192.72    9.35
   2  -6  -6  177.16    8.30
  -2  -6   5    6.68    2.94
   2  -6  -5    9.10    2.84
   2  -6  -5    6.55    1.94
  -2  -6   5    6.83    2.72
   2  -6  -5    7.33    2.45
   2  -6  -4  124.64    6.18
  -2  -6   4  170.44    9.95
   2  -6  -4  155.27    7.66
  -2  -6   3    2.29    2.60
   2  -6  -3    3.47    1.78
   2  -6  -3    4.19    1.94
  -2  -6   3    4.11    2.38
   2  -6  -3    4.88    2.20
  -2  -6   2    3.43    2.88
   2  -6  -2    4.01    2.18
   2  -6  -2    2.51    1.59
  -2  -6   2    2.91    2.24
   2  -6  -2    2.91    1.68
  -2  -6   1  139.50    8.20
   2  -6  -1  120.59    7.19
  -2  -6   1  128.87    8.67
   2  -6  -1  123.71    7.07
  -2  -6   0    0.09    2.85
   2  -6   0    1.04    2.43
  -2  -6   0    0.82    1.65
  -2  -6   0    0.85    1.81
   2  -6   0    2.20    2.20
  -2  -6  -1   11.19    3.25
   2  -6   1   11.27    2.73
  -2  -6  -1    9.80    2.85
   2  -6   1   12.07    2.78
  -2  -6  -1   11.48    2.82
  -2  -6  -2   11.43    3.28
   2  -6   2   11.14    2.85
  -2  -6  -2    9.80    2.84
   2  -6   2   10.62    2.42
  -2  -6  -3   13.23    3.58
  -2  -6  -3   14.57    3.33
  -2  -6  -3   12.49    2.82
   2  -6   3   12.19    2.79
   2  -6   4  408.93   14.51
  -2  -6  -4  381.20   14.42
   2  -6   4  444.91   15.54
   2  -6   5  103.40    6.04
  -2  -6  -5   85.27    6.07
   2  -6   6  106.53    6.70
   2   6   6  102.09    8.25
  -2  -6  -6  108.32    7.47
   2   6   6   92.54    7.99
   2  -6   7  195.71   10.23
   2   6   7  160.63   14.15
  -2  -6  -7  190.46   10.20
   2   6   7  186.55   11.02
   2   6   8   41.11    5.14
   2  -6   8   64.18    5.24
  -2  -6  -8   53.42    4.84
   2   6   8   56.00    6.15
   2   6   9   27.68    4.59
   2  -6   9   39.83    4.68
   2  -6   9   32.46    3.50
   2   6   9   30.47    3.93
   2   6  10    4.53    3.40
   2  -6  10    4.38    2.75
  -2  -6 -10    7.45    3.22
   2  -6  10    6.35    3.04
   2   6  10    6.13    3.16
   2   6  11   13.60    3.55
  -2  -6 -11   16.78    3.21
   2  -6  11   15.84    2.92
   2   6  11   17.98    3.93
   2   6  12    2.90    2.98
  -2  -6 -12    3.58    2.84
   2  -6  12    2.54    3.13
   2   6  12    3.44    2.52
   2   6  13    6.40    3.52
  -2  -6 -13    8.72    3.13
   2  -6  13    5.12    4.19
   2   6  13    5.98    2.64
   2   6  14  125.44    8.77
  -2  -6 -14  138.84    7.65
   2  -6  14  122.93    8.14
   2   6  14  138.32    7.10
   2   6  15    1.50    2.90
  -2  -6 -15    2.92    2.52
   2  -6  15   -3.47    7.78
   2   6  15    2.00    2.54
   2   6  16   11.09    3.56
  -2  -6 -16   13.76    3.12
   2  -6  16   10.29    8.03
   2   6  17   30.94    4.96
  -2  -6 -17   34.33    5.08
   2  -6  17   27.10   11.25
   2   6  17   36.02    4.53
   2   6  18   19.02    3.50
   2  -8 -14    7.78    2.66
   2  -8 -13   43.13    6.07
  -2  -8  13   33.99    7.57
   2  -8 -13   51.70    6.70
   2  -8 -12    3.40    2.52
  -2  -8  12    1.46    5.08
   2  -8 -12    3.82    2.26
   2   8 -11   45.94   13.78
   2  -8 -11   37.79    5.32
  -2  -8  11   36.26    5.72
   2  -8 -11   45.57    5.94
   2   8 -10   16.11   16.21
   2  -8 -10   10.78    2.84
  -2  -8  10   10.48    3.41
   2  -8 -10   13.79    2.92
   2   8  -9  -10.63   14.40
   2  -8  -9    6.76    2.52
  -2  -8   9    5.33    2.55
   2  -8  -9   10.62    2.85
  -2  -8   8    5.49   10.24
   2  -8  -8    5.61    2.70
  -2  -8   8    4.63    2.72
   2  -8  -8    6.59    2.39
  -2  -8   7   92.94    9.15
   2  -8  -7   79.94    7.02
  -2  -8   7   91.46    8.54
   2  -8  -7  116.92    7.36
  -2  -8   6  161.83   11.57
  -2  -8   6  128.72    8.76
   2  -8  -6  167.19    9.32
  -2  -8   5   15.74    3.24
  -2  -8   4   28.55    6.81
  -2  -8   4   23.47    3.92
   2  -8  -4   32.69    3.88
  -2  -8   3  111.64    8.45
   2  -8  -3   84.63    7.87
  -2  -8   3   98.41    8.06
   2  -8  -3  108.76    7.28
  -2  -8   2   23.90    6.15
   2  -8  -2   17.27    3.62
  -2  -8   2   16.45    3.82
   2  -8  -2   17.50    3.95
  -2  -8   1  452.88   14.03
   2  -8  -1  404.78   13.01
  -2  -8   1  411.99   17.36
   2  -8  -1  483.79   13.60
  -2  -8   0  122.80    7.32
   2  -8   0  127.25    7.59
   2  -8   0  125.40    7.02
  -2  -8  -1   37.98    5.37
   2  -8   1   35.50    4.32
   2  -8   1   38.29    3.98
  -2  -8  -2   47.53    5.46
   2  -8   2   48.31    4.74
  -2  -8  -2   34.70    4.25
   2  -8   2   54.65    4.96
   2  -8   3   24.20    3.96
  -2  -8  -3   21.17    3.67
   2  -8   3   25.34    3.33
  -2  -8  -4   43.37    5.17
   2  -8   4   48.76    4.69
   2  -8   5   42.89    4.69
  -2  -8  -5   37.70    4.37
   2  -8   5   42.09    4.13
   2  -8   6   19.15    4.97
  -2  -8  -6   19.84    3.34
   2  -8   6   19.41    3.41
   2  -8   7  102.56    7.60
  -2  -8  -7   86.44    6.10
   2  -8   7   97.13    6.90
   2  -8   8   58.26    7.41
  -2  -8  -8   52.19    5.12
   2  -8   8   53.20    5.20
   2  -8   9    3.62    7.10
  -2  -8  -9   10.39    3.04
   2  -8   9   10.26    2.64
   2  -8  10    1.72    8.11
  -2  -8 -10    4.60    2.38
   2  -8  10    4.37    2.61
  -2  -8 -11   17.22    3.25
  -2  -8 -12    8.09    2.51
  -3   1  23    3.04    2.69
  -3  -1  23    3.98    2.58
   3  -1 -23    4.26    2.36
   3   1 -23    4.41    2.46
  -3  -1  22    0.25    2.14
  -3  -1  22   -0.22    2.00
   3  -1 -22    0.62    2.02
  -3  -1  21   14.19    3.55
  -3  -1  21   13.41    2.76
   3  -1 -21   15.71    3.19
  -3  -1  21    2.54    5.11
   3  -1 -21   18.48    2.88
  -3  -1  20    9.53    3.21
  -3  -1  20   10.27    2.64
   3  -1 -20   10.04    2.46
   3  -1 -20    9.99    2.66
  -3  -1  19   18.71    3.39
  -3  -1  19   20.21    3.07
   3  -1 -19   19.67    2.70
   3  -1 -19   22.98    3.15
  -3  -1  18    2.18    2.23
  -3  -1  18    2.75    2.15
   3  -1 -18    2.42    2.05
   3  -1 -18    3.89    2.64
  -3   1  17    0.30    2.29
  -3  -1  17    0.62    2.00
  -3  -1  17    0.34    1.89
   3  -1 -17    1.46    2.23
  -3   1  17   -0.40    3.53
  -3   1  16  214.81   10.01
  -3  -1  16  208.75    9.47
  -3  -1  16  218.76    8.83
   3  -1 -16  225.13   14.74
   3  -1 -16  206.05   10.73
   3   1 -16  177.32   15.14
   3  -1 -16  229.19    9.72
  -3   1  16  213.50   10.66
  -3   1  15  227.18   10.38
  -3  -1  15  220.93    9.40
  -3  -1  15  235.31    9.44
   3  -1 -15  233.59   11.12
  -3   1  15  232.68   10.76
  -3  -1  15  243.70   11.18
  -3   1  14  294.55   12.19
  -3  -1  14  293.85   11.17
  -3   1  14  299.82   12.01
  -3  -1  14  314.09   11.02
   3  -1 -14  280.66   12.31
  -3   1  14  266.58   11.98
  -3  -1  14  323.74   12.96
  -3   1  13  317.74   11.30
  -3  -1  13  312.52   10.87
  -3   1  13  299.93   11.95
  -3  -1  13  353.18   12.59
  -3   1  12  164.74    8.08
  -3   1  11   49.20    4.69
   3  -1 -11   62.51    5.88
  -3   1  10  293.50   10.66
   3  -1 -10  311.63   11.18
  -3   1   9 1075.29   19.14
  -3  -1   9 1043.13   20.77
   3  -1  -9 1149.49   19.12
  -3   1   8 2240.76   27.78
  -3  -1   8 2223.16   30.33
   3  -1  -8 2430.76   27.85
  -3  -1   7   10.36    2.88
  -3   1   7   10.30    4.07
  -3  -1   7   10.30    3.15
   3  -1  -7   17.06    4.23
  -3   1   6    3.53    3.50
  -3  -1   6    3.96    2.72
   3  -1  -6    4.44    3.62
  -3   1   5 1255.19   21.51
  -3   1   4   42.64    5.17
  -3  -1   4   44.05    5.51
   3  -1  -4   54.03    4.78
  -3   1   3  172.48    8.17
   3   1  -3  168.53    7.90
   3  -1  -3  167.94    6.41
  -3   1   2  599.66   14.67
   3   1  -2  626.34   14.36
  -3   1   2  597.54   15.19
   3  -1  -2  601.93   12.56
  -3   1   1   56.98    5.86
   3   1  -1   57.92    5.23
  -3   1   1   57.59    6.47
   3  -1  -1   64.73    5.02
   3  -1   0 8929.03   46.23
   3  -1   1 5368.61   42.00
   3  -1   2 7964.53   63.29
   3   1   2 8158.19   50.94
  -3   1  -3 9230.07   60.01
   3  -1   3 9259.42   56.12
   3   1   3 9260.92   54.36
  -3   1  -4  547.25   14.73
   3  -1   4  537.12   15.32
   3   1   4  504.34   12.96
  -3  -1  -4  561.99   13.90
  -3   1  -5  112.38    8.11
   3  -1   5  108.40    6.12
   3   1   5  109.53    6.68
  -3  -1  -5  109.44    6.76
  -3   1  -6    0.68    2.79
   3  -1   6    0.48    2.26
   3   1   6    0.95    3.01
  -3   1  -7  351.88   12.26
   3  -1   7  281.19    9.61
   3   1   7  336.17   10.73
  -3  -1  -7  296.91   10.45
  -3  -1  -8  478.26   13.82
   3   1   8  433.51   12.28
  -3  -1  -8  362.46   11.49
   3   1   9  339.39   11.52
  -3  -1  -9  311.42   11.55
   3   1  10  544.73   15.41
  -3  -1 -10  545.72   15.34
   3   1  11  503.09   14.61
  -3  -1 -11  516.16   14.86
   3   1  12   15.40    3.24
   3   1  12   14.33    3.01
   3   1  12   16.91    2.87
  -3  -1 -12   16.45    3.64
   3  -1  12   14.51    5.98
   3   1  13    6.06    3.36
   3   1  13    7.13    2.72
  -3  -1 -13    6.16    2.38
   3  -1  13    6.12    7.62
   3   1  14  159.37    8.54
   3   1  14  158.57    7.53
   3  -1  14  163.78    7.44
   3  -1  14  149.56   11.27
   3   1  15    7.72    3.53
   3   1  15    7.42    2.67
   3  -1  15    6.56    2.33
  -3   1 -15    6.64    8.57
   3  -1  15    5.43    9.84
   3   1  16   48.62    5.39
   3   1  16   49.69    4.34
   3  -1  16   53.91    4.65
   3  -1  16   42.70    9.37
   3   1  17    0.80    3.21
   3   1  17    1.84    2.09
   3  -1  17    2.55    2.05
   3  -1  17    5.61   10.13
   3   1  18    0.92    3.16
   3   1  18    1.05    2.26
   3  -1  18    1.19    2.35
   3  -1  18   -3.34   10.35
   3   1  19  106.91    7.44
   3   1  19   99.97    5.91
   3  -1  19  103.29    6.40
   3  -1  19  103.34    9.26
   3   1  20   66.19    7.59
   3   1  20   57.28    5.89
   3  -1  20   62.88    5.73
   3   1  21  101.42    8.08
   3  -1  21   88.82    5.57
   3  -1  22    0.30    1.93
  -3   3  22   22.64    4.10
  -3  -3  22   21.25    3.21
   3  -3 -22   28.77    3.93
  -3   3  21    3.39    3.09
  -3  -3  21    2.85    2.26
  -3  -3  21    4.77    7.99
   3  -3 -21    2.38    2.30
  -3   3  20    3.85    3.39
  -3  -3  20    4.42    2.67
  -3  -3  20    4.90    2.38
   3  -3 -20    4.25    2.51
  -3  -3  20    3.10    9.83
   3  -3 -20    6.25    2.23
  -3   3  20    4.37    2.41
  -3   3  19   17.19    3.65
  -3  -3  19   12.04    2.70
  -3  -3  19   15.95    2.72
   3  -3 -19   15.31    3.49
  -3  -3  19   15.04   11.65
   3  -3 -19   20.30    2.94
  -3   3  18   14.06    3.37
  -3  -3  18   11.91    2.95
  -3  -3  18   14.48    2.90
   3  -3 -18   12.52    3.09
  -3  -3  18   19.70   10.16
   3  -3 -18   15.43    3.16
  -3   3  17   27.59    4.50
  -3  -3  17   23.44    3.36
  -3  -3  17   33.11    3.27
   3  -3 -17   31.27    3.79
  -3  -3  17   31.19    7.78
   3  -3 -17   34.59    3.82
  -3   3  16  737.22   18.23
  -3  -3  16  751.64   13.67
   3  -3 -16  712.78   17.62
   3  -3 -16  747.46   14.70
  -3  -3  16  705.56   16.03
   3  -3 -16  775.81   14.91
  -3   3  15   41.47    5.12
  -3  -3  15   37.16    4.26
  -3   3  15   34.33    4.13
  -3  -3  15   45.08    4.04
   3  -3 -15   39.97    3.99
   3  -3 -15   36.78    3.67
   3  -3 -15   41.51    3.70
  -3  -3  15   38.94    7.30
   3  -3 -15   43.10    4.05
  -3   3  14    6.37    2.66
  -3  -3  14    7.78    2.78
  -3   3  14    7.13    2.90
  -3  -3  14    8.23    2.46
   3  -3 -14    7.66    2.63
   3  -3 -14    6.62    2.26
   3  -3 -14    7.88    2.33
  -3  -3  14    7.01    5.36
   3  -3 -14    7.54    2.51
  -3   3  13    1.26    2.63
  -3  -3  13    1.51    1.78
  -3   3  13    1.60    2.51
   3  -3 -13    1.50    1.78
   3  -3 -13    1.34    1.54
   3  -3 -13    0.92    1.56
  -3  -3  13    1.92    4.14
   3  -3 -13    1.20    1.66
  -3   3  12  129.75    8.24
  -3  -3  12  128.81    7.07
  -3   3  12  112.81    7.62
   3  -3 -12  130.34    6.81
   3  -3 -12  127.86    5.89
   3  -3 -12  127.14    6.19
  -3  -3  12  157.97    8.49
   3  -3 -12  134.69    6.24
  -3   3  11  178.63    8.94
   3  -3 -11  200.05    8.61
   3  -3 -11  183.39    7.39
   3  -3 -11  193.71    8.48
  -3  -3  11  238.12   10.33
   3  -3 -11  194.13    7.75
   3  -3  -8  744.79   19.58
  -3   3   8  763.54   18.71
   3  -3  -7  258.84   10.14
  -3   3   7  238.34   10.96
   3  -3  -6  874.72   19.06
  -3   3   6  889.25   18.83
   3  -3  -5  366.38   14.00
  -3   3   5  405.96   12.78
   3  -3  -5  373.64    9.50
   3  -3  -4  486.96   14.13
   3   3  -4  489.81   19.91
  -3   3   4  543.92   15.10
   3  -3  -4  544.28   12.00
   3  -3  -3  221.52   10.32
   3   3  -3  236.05   11.24
  -3   3   3  249.71   11.67
   3  -3  -3  252.49    9.21
   3   3  -2  786.67   17.99
  -3   3   2  738.39   18.50
   3  -3  -2  725.49   14.51
   3   3  -1  198.49    9.55
  -3   3   1  165.32    9.25
   3  -3  -1  165.99    6.27
   3   3   0  876.41   18.74
  -3   3   0  803.13   21.11
   3  -3   0  834.44   14.64
   3   3   1 1046.29   22.18
  -3  -3  -1 1070.46   20.07
   3   3   2   21.38    4.28
  -3  -3  -2   21.75    4.10
   3   3   3  607.08   15.07
  -3  -3  -3  630.14   14.61
   3   3   4 1564.62   24.54
  -3  -3  -4 1691.46   24.30
   3   3   5  786.38   17.36
  -3  -3  -5  799.67   17.73
   3   3   6  106.25    6.89
  -3  -3  -6  121.49    5.94
  -3  -3  -7  576.44   15.98
   3   3   8  137.45    7.66
  -3  -3  -8  129.21    7.69
   3   3   9  197.97    9.18
  -3  -3  -9  178.48    7.97
   3   3  10  280.25   11.57
   3   3  10  282.17   11.08
   3  -3  10  286.00    9.89
  -3  -3 -10  332.69   13.85
   3  -3  10  332.40   13.32
   3   3  11   44.36    4.83
   3  -3  11   44.47    4.08
  -3  -3 -11   50.99    5.26
   3  -3  11   48.09    4.91
   3   3  12  365.98   15.57
   3  -3  12  389.31   12.31
  -3  -3 -12  422.31   17.95
   3  -3  12  399.94   16.09
   3   3  12  377.78   13.24
   3   3  13   96.24    9.50
   3  -3  13  108.13    6.47
   3  -3  13  101.35    7.71
   3   3  13  111.10    6.93
   3  -3  14  147.21    8.49
   3  -3  14  153.95    9.77
   3   3  14  159.40    7.32
   3  -3  15  157.07    9.55
   3  -3  15  153.88   12.53
   3   3  15  156.70    8.54
   3   3  16    5.08    3.43
   3  -3  16    5.18    2.33
   3  -3  16   -0.76   10.16
   3   3  16    5.94    2.58
   3   3  17    6.07    3.47
   3  -3  17    5.94    2.88
   3  -3  17    6.56   11.31
   3   3  17    5.94    2.41
   3   3  18   14.98    3.55
   3  -3  18   16.36    3.13
   3  -3  18    7.75   13.27
   3   3  18   14.18    2.95
   3   3  19   61.23    6.44
   3  -3  19   61.01    5.82
   3  -3  19   53.48   12.49
   3   3  20   10.26    3.36
   3  -3  20   11.05    2.57
   3  -3  20    7.99    8.95
   3   3  21   18.53    3.73
   3  -3  21   17.27    2.82
  -3  -5  20    6.40    2.26
   3  -5 -20    5.73    2.51
  -3  -5  20    5.27   10.19
   3  -5 -20    7.25    2.38
  -3   5  20    5.81    2.39
  -3  -5  19    8.34    2.38
   3  -5 -19    9.44    2.87
  -3  -5  19    6.95   11.88
   3  -5 -19   11.52    2.76
  -3   5  19    9.58    2.94
  -3  -5  18    2.95    2.08
   3  -5 -18    4.81    2.72
  -3  -5  18    2.33   10.82
   3  -5 -18    4.54    2.27
  -3  -5  17   21.23    2.90
   3  -5 -17   23.92    3.70
  -3  -5  17   18.25   10.79
   3  -5 -17   23.62    3.04
  -3  -5  16   52.31    3.92
   3  -5 -16   61.16    5.14
  -3  -5  16   51.73    8.34
   3  -5 -16   65.52    5.05
  -3  -5  15    8.03    2.03
   3  -5 -15   10.16    2.88
  -3  -5  15    4.23    7.62
   3  -5 -15   10.72    2.75
  -3  -5  14   13.66    2.32
  -3  -5  14   10.01    5.78
   3  -5 -14   17.24    3.15
  -3  -5  13    7.25    2.17
  -3  -5  13    4.39    3.50
   3  -5 -13    6.87    2.70
   3  -5 -12  476.07   16.60
  -3  -5  12  519.22   18.84
   3  -5 -12  542.04   18.28
  -3   5  11  285.51   13.26
   3  -5 -11  313.91   13.08
   3  -5 -11  279.91   11.52
  -3  -5  11  318.80   13.64
   3  -5 -11  324.94   12.80
  -3  -5  10   14.16    6.62
  -3   5  10   13.27    3.15
   3  -5 -10   17.15    3.46
   3  -5 -10   12.90    2.38
  -3  -5  10   12.86    3.30
   3  -5 -10   14.77    2.63
  -3  -5   9   31.39    6.31
  -3   5   9   22.76    4.11
   3  -5  -9   28.42    3.90
   3  -5  -9   22.58    3.16
  -3  -5   9   29.25    4.16
   3  -5  -9   25.63    3.40
  -3  -5   8  311.86   13.12
  -3   5   8  248.33   12.16
   3  -5  -8  258.81   11.11
   3  -5  -8  232.54    9.10
  -3  -5   8  264.12   11.82
   3  -5  -8  259.71   10.11
  -3  -5   7  148.80    8.45
  -3   5   7  125.83    8.31
   3  -5  -7  114.19    8.05
   3  -5  -7  109.05    5.40
  -3  -5   7  129.73    8.28
   3  -5  -7  119.79    6.13
  -3  -5   6    3.68    3.36
  -3   5   6    2.61    3.04
   3  -5  -6    3.79    2.48
   3  -5  -6    2.63    2.02
  -3  -5   6    3.73    2.12
   3  -5  -6    3.00    2.11
  -3   5   5   27.38    4.53
   3  -5  -5   23.80    2.75
   3  -5  -5   26.59    3.04
  -3   5   4   85.56    7.78
   3   5   2   25.30    4.20
  -3  -5  -2   23.64    3.19
   3  -5   3    3.76    1.86
   3   5   3    3.40    2.33
  -3  -5  -3    4.66    2.52
  -3  -5  -3    5.78    2.05
   3  -5   3    4.74    2.57
   3  -5   4  394.28   12.29
   3   5   4  357.99   13.84
  -3  -5  -4  335.50   12.77
   3  -5   4  422.99   14.34
   3   5   5   53.63    6.04
   3  -5   5   59.55    5.06
   3   5   5   55.96    5.42
  -3  -5  -5   52.60    5.34
   3  -5   5   62.54    5.27
   3   5   5   52.02    5.72
   3   5   6  144.02    9.26
   3  -5   6  180.38    9.19
   3   5   6  156.50    8.67
   3  -5   6  173.50    9.29
   3   5   6  138.87    8.21
   3   5   7    3.40    2.69
   3  -5   7    5.61    2.61
   3   5   7    3.68    2.88
  -3  -5  -7    4.32    2.87
   3  -5   7    4.25    2.46
   3   5   7    3.46    2.76
   3   5   8   15.32    4.05
   3  -5   8   21.44    3.52
   3   5   8   15.63    3.64
  -3  -5  -8   18.68    3.13
   3  -5   8   21.10    3.59
   3   5   8   16.03    3.59
   3   5   9  155.49   10.32
   3  -5   9  183.84   11.40
   3   5   9  155.45    9.18
  -3  -5  -9  174.28    9.18
   3  -5   9  178.69    9.64
   3   5   9  162.35    9.16
   3   5  10   10.70    4.51
  -3  -5 -10   13.29    3.61
   3  -5  10   11.24    3.03
   3   5  10   10.33    2.88
   3   5  11   28.74    4.94
  -3  -5 -11   35.26    4.47
   3  -5  11   35.89    3.86
   3   5  11   28.28    3.85
   3   5  12  134.81    9.21
   3  -5  12  110.09    7.19
  -3  -5 -12  137.45    8.15
   3  -5  12  121.02    7.93
   3   5  13    9.18    3.46
   3  -5  13    6.53    2.42
  -3  -5 -13    9.09    3.13
   3  -5  13    7.23    4.54
   3   5  14  197.97   11.95
   3  -5  14  163.04    9.92
  -3  -5 -14  179.53   12.06
   3  -5  14  176.31   10.72
   3   5  14  167.88    9.64
   3   5  15   64.90    6.49
   3  -5  15   66.38    5.14
  -3  -5 -15   73.60    7.25
   3  -5  15   58.36    9.70
   3   5  15   62.85    5.02
   3   5  16  153.95    9.89
   3  -5  16  128.95    7.47
  -3  -5 -16  147.15   10.50
   3  -5  16  122.96   10.66
   3   5  16  149.69    8.37
   3   5  17    5.92    3.73
   3  -5  17    7.19    2.30
   3  -5  17    6.65   12.44
   3   5  17    6.31    2.63
   3   5  18   20.40    4.11
   3  -5  18   18.31    2.84
   3  -5  18   19.42   11.85
   3   5  18   19.00    3.13
   3   5  19   68.42    7.79
  -3   7  17   15.81    3.34
  -3  -7  16    0.33    1.51
   3  -7 -16    0.64    2.51
  -3  -7  16    0.00   10.01
   3  -7 -16    1.07    2.02
  -3   7  16    0.92    2.35
  -3  -7  15    5.26    1.83
   3  -7 -15    6.84    2.84
  -3  -7  15    0.53    8.46
   3  -7 -15    7.20    2.41
  -3   7  15    7.78    2.90
  -3  -7  14    0.74    1.71
   3  -7 -14    1.13    2.63
  -3  -7  14   -1.07    7.65
   3  -7 -14    0.83    2.21
  -3   7  14    0.98    2.60
  -3  -7  13    0.58    1.66
   3  -7 -13    1.37    2.20
   3  -7 -13    0.82    2.33
  -3   7  13    1.29    2.82
   3   7 -12  153.37   13.47
  -3  -7  12  114.81    6.00
   3  -7 -12  136.79    7.75
  -3  -7  12  129.72    9.84
   3  -7 -12  159.81    9.09
   3   7 -11   14.09   13.87
  -3  -7  11   13.07    2.26
   3  -7 -11   17.48    3.31
  -3  -7  11   15.63    3.90
   3  -7 -11   18.14    3.50
   3  -7 -10    4.08    2.29
  -3  -7  10    3.00    2.87
   3  -7 -10    5.45    2.23
  -3  -7   9   48.42   11.15
   3  -7  -9   41.71    4.65
  -3  -7   9   45.12    5.89
   3  -7  -9   48.45    4.25
  -3  -7   8    6.25    9.18
   3  -7  -8    4.38    2.24
  -3  -7   8    5.63    2.84
   3  -7  -8    3.19    3.03
  -3  -7   7  484.31   14.06
  -3  -7   7  469.87   17.74
   3  -7  -7  503.50   13.32
  -3  -7   6  173.28    9.93
   3  -7  -6  173.80    9.96
  -3  -7   6  168.89    9.99
   3  -7  -6  188.02   10.04
  -3  -7   5  924.25   19.38
  -3  -7   5  867.25   25.57
   3  -7  -5 1060.41   20.18
   3  -7  -4   10.51    2.97
  -3  -7   4    9.72    2.98
   3  -7  -4   12.28    2.52
  -3  -7   3    9.09    5.58
   3  -7  -3    5.85    2.49
   3  -7  -3    7.84    2.79
  -3  -7   2  201.34    9.68
   3  -7  -2  188.72    9.47
   3  -7  -2  214.24    9.71
  -3  -7   1   37.88    6.12
   3  -7  -1   33.39    3.92
  -3  -7   1   22.55    3.30
   3  -7  -1   31.77    4.22
  -3  -7   0   41.85    5.98
   3  -7   0   43.34    4.45
  -3  -7   0   30.91    4.11
   3  -7   0   41.56    4.42
  -3  -7  -1   70.45    6.59
   3  -7   1   71.55    5.40
  -3  -7  -1   54.30    5.46
   3  -7   1   69.80    5.64
  -3  -7  -2   71.13    6.67
   3  -7   2   87.29    5.89
  -3  -7  -2   62.19    5.15
  -3  -7  -3  399.21   14.62
   3  -7   4  203.42   10.39
  -3  -7  -4  178.74    9.92
   3  -7   5   24.93    3.79
  -3  -7  -5   16.51    2.91
   3  -7   6    2.03    2.15
  -3  -7  -6    2.06    2.21
   3  -7   7    0.24    2.41
  -3  -7  -7    1.26    2.72
   3  -7   7    0.65    2.41
   3   7   7    0.43    2.24
   3  -7   8   22.24    3.77
  -3  -7  -8   19.57    3.18
   3  -7   8   22.17    3.47
   3   7   8   19.42    3.70
   3  -7   9   22.24    4.07
  -3  -7  -9   21.16    3.19
   3  -7   9   23.73    3.40
   3   7   9   23.38    4.25
   3  -7  10    9.23    4.56
   3  -7  10    9.23    2.98
   3   7  10   10.14    3.30
  -3  -7 -11   39.94    4.50
   3  -7  11   38.41    4.44
   3   7  11   44.53    5.14
  -3  -7 -12   33.21    4.34
   3  -7  12   24.25    4.41
   3   7  12   30.84    4.32
  -3  -7 -13    2.94    2.41
   3  -7  13    1.08    5.18
   3   7  13    3.61    2.58
  -3  -7 -14   10.73    2.90
   3  -7  14   -1.31    7.02
   3   7  14   14.51    3.15
  -3  -7 -15   44.54    5.37
   3  -7  15   40.40    8.88
   3   7  15   50.82    6.04
   3   9  -9    2.67    7.02
   3  -9  -9    2.32    2.32
   3   9  -8   18.29    9.96
   3  -9  -8    8.18    2.66
   3   9  -7   -4.22   12.81
   3  -9  -7    4.77    2.57
   3  -9  -6   22.03    3.47
   3   9  -5    8.86   15.47
   3   9  -4  262.42   26.40
   3   9  -3   45.39   15.63
   3  -9  -2    0.42    4.53
   3   9  -2    8.85   17.16
   3  -9  -2    0.04    2.39
   3  -9  -1   -1.65    4.39
   3   9  -1   -2.42   14.19
   3  -9  -1    0.18    2.46
   3  -9   0   18.94    5.64
   3   9   0   33.23   11.88
   3  -9   0   22.94    3.73
   3  -9   1   26.70    6.04
   3   9   1   32.35    9.10
   3  -9   1   25.76    3.76
   3  -9   2   37.61    6.55
   3  -9   2   37.00    4.77
   3  -9   3    3.86    6.38
  -3  -9  -3    2.87    2.09
   3  -9   3    2.55    2.03
  -3  -9  -4   10.10    2.75
   3  -9   4   13.48    2.91
   3  -9   5   -4.32    7.01
  -3  -9  -5    2.30    2.06
   3  -9   5    2.35    2.23
   3  -9   6    6.35    7.56
  -3  -9  -6    3.64    2.29
   3  -9   6    3.83    2.21
   3  -9   7   -4.80    8.15
  -3  -9  -7    0.55    1.90
   3  -9   7    0.58    2.09
   3  -9   8   34.50    9.49
  -3  -9  -8   34.36    5.03
   3  -9   8   31.71    4.80
  -4   0  24   19.81    4.04
  -4   0  23   -0.07    2.46
  -4   0  22   22.15    4.02
   4   0 -22   22.08    4.20
  -4   0  21    1.31    3.04
   4   0 -21    0.89    2.05
  -4   0  20   17.37    3.52
   4   0 -20   18.08    3.30
   4   0 -20   19.48    3.52
  -4   0  19   -0.07    2.32
   4   0 -19   -0.22    2.15
  -4   0  18  310.41   12.34
  -4   0  17    0.76    3.52
   4   0 -16   32.37    6.22
  -4   0  16   32.56    4.42
   4   0 -15    0.12    1.89
   4   0 -15   -1.75    8.06
  -4   0  15   -0.99    3.33
  -4   0  14  103.35    6.59
   4   0 -14  144.09   11.43
  -4   0  14  124.80    7.77
  -4   0  13    0.92    2.24
   4   0 -13    9.19    7.36
  -4   0  13    1.37    2.33
  -4   0  12   33.39    3.64
   4   0 -12   39.05    9.89
   4   0 -11   -2.63   10.47
  -4   0  10   53.06    4.90
   4   0 -10   33.70    9.06
  -4   0   9    0.97    2.85
   4   0  -9   -2.54    8.03
  -4   0   8    9.01    3.25
   4   0  -8    5.60    6.76
  -4   0   7    2.18    2.33
  -4   0   7    1.83    3.00
   4   0  -7    1.25    5.36
  -4   0   5    0.94    3.52
   4   0  -5    0.80    3.88
  -4   0   3   34.86    6.41
   4   0  -3   47.87    4.87
   4   0  -1    9.56    4.29
   4   0  -1   10.96    2.79
   4   0   0 3869.28   34.82
   4   0   1    4.80    4.32
   4   0   2  533.74   13.67
   4   0   3   27.48    4.37
   4   0   4  433.74   12.38
   4   0   5    2.30    3.07
   4   0   6   94.75    6.12
  -4   0  -7    1.47    2.72
   4   0   7    1.10    2.17
  -4   0  -8  501.22   15.80
   4   0   8  460.82   13.63
   4   0   9   -0.31    2.17
  -4   0 -10  817.47   19.43
   4   0  11    9.72    2.55
  -4   0 -11    7.07    3.13
   4   0  12  293.69   13.23
   4   0  12  305.49   11.48
   4   0  13    0.30    2.35
   4   0  13    0.40    2.20
   4   0  14   74.77    6.06
   4   0  14   77.37    5.40
   4   0  15    0.55    2.98
   4   0  15    0.13    2.63
   4   0  16   13.61    3.30
   4   0  16   12.55    2.70
   4   0  17    0.42    2.58
   4   0  17   -0.09    2.06
   4   0  18    0.88    2.73
   4   0  18   -0.50    2.17
   4   0  19   -0.70    2.54
   4   0  19    0.52    2.12
   4   0  20   15.23    3.01
   4   0  21    0.22    1.97
  -4   2  23   34.68    4.99
  -4  -2  23   32.89    5.12
   4  -2 -23   49.47    5.98
   4   2 -23   46.00    6.22
  -4   2  22    4.56    3.09
  -4  -2  22    3.07    2.09
   4  -2 -22    5.78    2.51
  -4   2  21   35.89    4.50
  -4  -2  21   32.93    4.48
  -4  -2  21   33.32    3.73
   4   2 -21   32.71    5.78
  -4  -2  21   31.43    8.70
   4  -2 -21   43.15    4.71
  -4   2  20   29.34    4.26
  -4  -2  20   25.09    3.43
  -4  -2  20   30.48    3.50
   4  -2 -20   30.12    6.34
   4  -2 -20   32.95    3.56
  -4  -2  20   34.89    8.05
   4  -2 -20   33.81    3.65
  -4   2  19   26.75    4.50
  -4  -2  19   22.27    3.22
  -4  -2  19   24.45    3.12
   4  -2 -19   25.09    4.77
   4  -2 -19   25.69    3.19
  -4  -2  19   22.21    7.28
   4  -2 -19   23.98    3.76
  -4   2  18   17.82    3.82
  -4  -2  18   16.45    3.27
  -4  -2  18   17.70    2.79
   4  -2 -18   18.92    3.04
   4  -2 -18   19.36    2.91
  -4  -2  18   12.62    6.00
  -4   2  17   51.06    4.93
  -4  -2  17   42.69    4.53
  -4  -2  17   49.32    3.90
   4  -2 -17   47.64    4.45
   4  -2 -17   52.54    4.02
  -4  -2  17   44.78    6.12
  -4   2  16   55.63    5.37
  -4  -2  16   53.33    4.75
  -4   2  16   48.83    4.69
  -4  -2  16   62.00    4.47
   4  -2 -16   59.15    5.21
   4  -2 -16   59.54    4.65
  -4  -2  16   55.45    6.28
  -4   2  15   62.11    5.54
  -4  -2  15   59.54    4.71
  -4   2  15   54.61    4.91
  -4  -2  15   66.01    4.29
   4  -2 -15   62.42    4.77
   4   2 -15   28.97   12.80
   4  -2 -15   56.58    4.20
  -4  -2  15   59.60    5.79
  -4   2  14   49.19    4.77
  -4  -2  14   48.68    4.59
  -4   2  14   42.51    5.03
  -4  -2  14   59.69    4.51
   4  -2 -14   46.92    4.26
   4  -2 -14   39.52    3.58
   4  -2 -14   49.10    4.08
  -4  -2  14   50.61    6.30
   4  -2 -14   43.31    3.82
  -4   2  13   34.27    4.77
  -4  -2  13   33.42    3.76
  -4   2  13   27.90    3.73
   4  -2 -13   32.10    3.61
   4  -2 -13   33.27    3.41
   4  -2 -13   36.69    3.71
  -4  -2  13   35.60    5.17
   4  -2 -13   34.01    3.73
  -4   2  12   33.93    4.19
   4  -2 -12   37.58    3.44
   4  -2 -12   38.81    3.36
   4  -2 -12   43.10    3.70
   4  -2 -12   39.97    3.46
  -4   2  11   20.16    3.77
   4  -2 -11   21.01    3.00
  -4   2  10   45.55    4.74
   4  -2 -10   47.45    3.77
  -4   2   9  240.33    9.58
   4  -2  -9  244.34    8.74
  -4   2   8  177.17    8.95
   4  -2  -8  214.08    7.82
  -4  -2   7 1070.57   21.63
   4  -2  -7 1135.75   16.78
  -4   2   6   14.05    3.90
  -4  -2   6   14.74    3.41
   4  -2  -6   13.05    2.72
  -4   2   5   36.61    4.51
  -4  -2   5   35.72    4.63
   4  -2  -5   38.45    3.68
   4   2  -4  302.73   12.56
  -4   2   4  315.74   12.93
   4  -2  -4  299.17    9.19
   4   2  -3  378.53   12.07
  -4   2   3  385.31   13.26
   4  -2  -3  403.81   12.00
   4   2  -2   16.60    3.85
  -4   2   2   15.62    4.14
   4  -2  -2   21.35    3.34
   4   2  -1  402.39   12.14
  -4   2   1  399.74   13.33
   4  -2  -1  421.54   10.10
   4   2   0  640.99   15.98
  -4   2   0  614.72   18.84
   4  -2   0  690.82   14.18
   4   2   1   37.46    5.02
  -4   2  -1   36.05    4.80
   4  -2   1   46.34    4.37
  -4  -2  -1   40.53    3.82
   4   2   2  313.73   10.48
  -4   2  -2  313.11   13.99
  -4  -2  -2  365.05   11.40
  -4   2  -3  191.84   11.18
  -4  -2  -3  214.48   10.57
  -4  -2  -4  130.71    7.23
   4   2   5  622.35   14.58
  -4  -2  -5  579.65   14.61
   4   2   6  578.92   14.13
  -4  -2  -6  514.82   12.75
   4   2   7   63.99    5.63
  -4  -2  -7   57.32    4.37
   4   2   8   92.56    5.97
   4   2   9  193.26    8.89
   4   2  10   48.00    5.09
   4   2  10   49.77    4.60
   4  -2  10   47.07    4.22
   4   2  11   24.14    4.39
   4   2  11   27.27    4.02
   4  -2  11   28.64    3.76
   4  -2  11   27.79    4.84
   4   2  11   25.24    3.62
   4   2  12   80.52    6.50
   4   2  12   80.19    6.34
   4   2  12   76.69    5.85
   4  -2  12   63.77    4.75
   4  -2  12   66.60    6.99
   4   2  12   77.25    5.85
   4   2  13  108.32    7.62
   4   2  13  105.53    7.51
   4   2  13   98.09    6.28
   4  -2  13  109.02    6.52
   4  -2  13   99.80    9.18
   4   2  13   92.88    7.57
   4   2  14   28.97    4.19
   4   2  14   27.96    3.74
   4  -2  14   30.36    3.98
   4  -2  14   23.83    9.25
   4   2  14   31.05    3.85
   4   2  15   62.28    5.91
   4   2  15   57.93    5.12
   4  -2  15   72.87    5.39
   4  -2  15   73.97    9.64
   4   2  15   60.00    6.01
   4   2  16   60.52    5.51
   4   2  16   52.26    4.51
   4  -2  16   63.53    4.83
   4  -2  16   52.38   12.75
   4   2  17    2.05    2.90
   4   2  17    2.03    2.35
   4  -2  17    3.41    2.73
   4  -2  17   -0.19   12.37
   4   2  18  198.34    9.41
   4   2  18  179.43    8.92
   4   2  19   70.66    7.48
   4   2  20    1.05    2.76
   4   2  21   51.24    6.92
   4  -2  21   42.89    4.94
  -4   4  21   24.85    4.07
  -4  -4  21   25.33    3.16
   4  -4 -21   25.58    4.59
  -4  -4  21   30.50    8.55
   4  -4 -21   32.98    4.44
  -4   4  21   25.27    3.62
  -4   4  20   45.21    6.27
  -4  -4  20   46.89    5.29
   4  -4 -20   51.37    6.73
  -4  -4  20   46.68   10.99
   4  -4 -20   64.07    6.93
  -4   4  20   44.39    5.66
  -4   4  19    4.20    2.97
  -4  -4  19    3.62    2.30
   4  -4 -19    4.51    2.70
  -4  -4  19    8.58   10.10
   4  -4 -19    4.88    2.58
  -4   4  18    5.97    3.00
  -4  -4  18    5.94    2.00
   4  -4 -18    7.28    2.87
  -4  -4  18    3.71   10.63
   4  -4 -18    8.54    2.64
  -4   4  17   39.17    5.26
  -4  -4  17   33.24    4.78
   4  -4 -17   42.77    4.38
  -4  -4  17   32.78   10.36
   4  -4 -17   47.11    4.47
  -4   4  16   96.97    9.89
  -4  -4  16   86.47    6.95
   4  -4 -16  103.26    7.01
  -4  -4  16   93.30    9.56
   4  -4 -16  118.54    6.46
  -4   4  15   59.02    8.79
  -4  -4  15   49.23    5.34
   4  -4 -15   71.53    5.54
  -4  -4  15   57.61    8.17
   4  -4 -15   71.15    5.20
  -4  -4  14  139.70    8.58
   4  -4 -14  172.18    8.67
  -4  -4  14  147.27    9.26
   4  -4 -14  181.61    9.29
  -4  -4  13   56.69    5.55
   4  -4 -13   64.32    5.29
  -4  -4  13   61.11    6.21
   4  -4 -13   67.08    5.23
  -4  -4  12    1.68    1.72
  -4   4  12    1.90    2.17
   4  -4 -12    2.98    2.06
  -4  -4  12    2.66    3.41
  -4  -4  11    0.33    1.99
  -4   4  11    0.70    2.55
   4  -4 -11    0.67    2.51
  -4  -4  11    1.01    2.60
  -4  -4  10   91.13    7.01
  -4   4  10  104.05    7.13
   4  -4 -10  114.95    6.77
  -4  -4  10  116.68    8.39
  -4   4   9   22.48    4.01
   4  -4  -9   19.21    3.27
   4  -4  -8  132.42    6.46
  -4   4   7   78.75    6.16
   4  -4  -7   78.96    4.96
  -4   4   6   52.97    5.40
   4  -4  -6   50.97    4.02
  -4   4   5  170.67    8.76
   4  -4  -5  171.02    7.01
  -4   4   4   33.75    4.42
   4  -4  -4   31.54    3.04
  -4   4   3  410.95   15.31
   4  -4  -3  347.04    9.98
   4   4  -2    7.13    2.64
  -4   4   2    7.05    2.97
   4  -4  -2    7.66    1.81
   4   4  -1    3.04    2.90
   4  -4  -1    2.38    2.02
   4   4   0  614.85   18.48
   4  -4   0  554.29   14.27
   4   4   1   15.14    4.04
  -4  -4  -1   15.66    3.44
   4   4   2   36.03    4.96
   4   4   3  164.55    9.87
   4   4   4  277.03   11.19
   4   4   5    2.29    2.98
   4   4   6    1.22    3.34
   4   4   7   89.94    7.01
   4   4   7   94.19    6.62
  -4  -4  -7  100.00    6.73
   4  -4   7   94.65    6.61
   4   4   7   91.59    6.56
   4   4   8  322.98   14.03
   4   4   8  355.86   13.70
  -4  -4  -8  392.42   15.05
   4  -4   8  373.85   15.66
   4   4   8  332.89   13.21
   4   4   9    5.18    2.98
  -4  -4  -9    7.08    2.58
   4  -4   9    5.81    2.76
   4   4  10    8.73    4.11
   4  -4  10    9.43    2.39
  -4  -4 -10   10.63    3.43
   4  -4  10   10.05    2.97
   4   4  11  185.93   11.02
   4   4  11  139.77    9.71
   4  -4  11  177.07    9.01
  -4  -4 -11  216.29   12.50
   4  -4  11  209.64   11.91
   4   4  11  190.65    9.40
   4   4  12    5.48    4.17
   4  -4  12    5.61    2.61
  -4  -4 -12    6.01    2.60
   4  -4  12    5.81    3.65
   4   4  12    5.40    2.51
   4   4  13   54.87    6.16
   4  -4  13   46.35    4.35
  -4  -4 -13   56.64    6.19
   4  -4  13   45.14    6.31
   4   4  13   49.17    4.60
   4   4  14   20.22    4.86
   4  -4  14   17.53    2.85
  -4  -4 -14   18.87    4.93
   4  -4  14   14.70    7.71
   4   4  14   19.23    3.55
   4   4  15    9.68    3.37
   4  -4  15    9.96    2.38
   4  -4  15   10.88   10.23
   4   4  15   10.36    2.72
   4  -4  16   17.37    3.03
   4  -4  16   16.97    9.06
   4   4  16   18.71    3.25
   4  -4  17   38.39    3.93
   4  -4  17   34.07   13.05
   4   4  17   46.71    4.37
   4  -4  18   46.14    5.75
   4  -4  18   40.58   12.59
   4   4  18   50.81    6.06
   4  -4  19   17.01    2.64
   4   4  19   15.37    3.01
  -4  -6  19    1.93    1.80
   4  -6 -19    2.98    2.72
  -4  -6  18    0.43    1.63
   4  -6 -18    0.45    2.57
  -4  -6  18    0.25    9.71
   4  -6 -18    0.37    2.08
  -4  -6  17   10.08    2.33
  -4  -6  17    7.10   10.44
   4  -6 -17   12.53    2.84
  -4   6  17   11.89    3.04
  -4  -6  16    9.58    1.94
  -4  -6  16    7.13    9.61
   4  -6 -16   12.10    2.95
  -4  -6  15   13.33    2.43
   4  -6 -15   16.91    3.43
  -4  -6  15    3.73    7.69
   4  -6 -15   16.38    2.94
  -4  -6  14  138.78    6.43
   4  -6 -14  159.22    9.19
  -4  -6  14  122.71    8.17
   4  -6 -14  182.63    8.24
  -4  -6  13   90.69    6.64
   4  -6 -13   97.69    7.04
  -4  -6  13   91.56    8.89
   4  -6 -13  112.50    7.20
   4   6 -12   82.19   11.21
   4  -6 -12   70.06    5.15
  -4  -6  12   73.24    6.59
   4  -6 -12   77.50    5.23
   4   6 -11    7.25   12.56
   4  -6 -11   12.31    3.77
  -4  -6  11    8.27    3.65
   4  -6 -11   13.90    3.43
  -4  -6  10  305.00   16.84
   4  -6 -10  210.92   10.39
  -4  -6  10  244.61   14.62
   4  -6 -10  256.99   11.33
  -4  -6   9   17.21    8.39
   4  -6  -9   13.35    3.49
  -4  -6   9   12.77    3.43
   4  -6  -9   15.03    3.15
  -4  -6   8    7.71    7.54
   4  -6  -8    5.92    2.70
  -4  -6   8    5.58    2.75
   4  -6  -8    7.17    2.57
  -4  -6   7    0.80    6.64
   4  -6  -7    0.34    2.32
   4  -6  -7    0.59    1.40
  -4  -6   7    0.10    1.87
   4  -6  -7    0.98    1.99
  -4  -6   6   83.72    8.58
  -4  -6   5    8.55    4.74
   4  -6  -4   45.31    4.78
   4  -6  -3  162.23    9.28
  -4  -6   2  127.42    8.83
   4  -6  -2   96.85    6.93
  -4  -6   2   83.38    6.61
   4  -6  -2   88.82    5.49
   4  -6  -2   97.96    5.76
  -4  -6   1    3.89    3.98
   4  -6  -1    2.42    1.96
  -4  -6   1    3.22    2.58
   4  -6  -1    2.45    2.12
  -4  -6   0   30.48    5.78
   4  -6   0   23.65    3.27
  -4  -6   0   21.65    3.13
   4  -6   0   25.00    3.82
  -4  -6  -1    4.74    4.17
   4  -6   1    4.87    2.15
  -4  -6  -1    4.84    2.15
   4  -6   1    4.66    2.42
  -4  -6  -2  115.85    8.69
  -4  -6  -2   88.89    6.86
   4  -6   2  108.68    6.81
   4   6   3   33.14    4.60
   4  -6   3   55.57    4.77
  -4  -6  -3   41.16    4.57
   4  -6   3   49.83    4.32
   4   6   4   19.90    3.70
   4  -6   4   35.77    4.22
  -4  -6  -4   27.26    3.85
   4  -6   4   31.02    3.79
   4   6   5    6.77    3.07
   4  -6   5   11.12    3.03
  -4  -6  -5    6.49    2.42
   4  -6   5    6.25    2.29
   4   6   5    9.34    3.01
   4   6   6   31.74    4.60
   4  -6   6   49.00    4.68
   4  -6   6   41.63    4.62
   4   6   6   37.28    4.66
   4   6   7    1.63    3.47
   4  -6   7    4.38    2.73
   4  -6   7    3.79    2.08
   4   6   7    2.95    2.33
   4   6   8    2.75    2.98
   4  -6   8    3.44    2.75
  -4  -6  -8    3.31    2.78
   4  -6   8    2.79    2.66
   4   6   8    2.20    2.30
   4   6   9   29.03    4.62
   4  -6   9   31.12    3.67
  -4  -6  -9   34.19    4.22
   4  -6   9   31.45    3.74
   4   6   9   33.58    4.45
   4   6  10   27.50    4.80
  -4  -6 -10   28.12    3.67
   4  -6  10   25.40    3.65
   4   6  10   30.78    3.88
   4   6  11   67.42    6.86
  -4  -6 -11   67.76    6.13
   4  -6  11   72.69    6.98
   4   6  11   71.22    5.89
   4   6  12    0.91    2.72
  -4  -6 -12    0.33    2.42
   4  -6  12   -0.61    3.47
   4   6  12    1.44    2.91
   4   6  13   44.13    5.52
  -4  -6 -13   41.14    5.54
   4  -6  13   43.19    6.34
   4   6  13   46.40    4.66
   4   6  14   35.16    5.26
  -4  -6 -14   32.41    4.50
   4  -6  14   28.33    6.46
   4   6  14   38.78    4.75
   4   6  15   -0.07    2.95
  -4  -6 -15    1.07    2.09
   4  -6  15    4.31    8.98
   4   6  16    8.69    3.10
   4  -6  16   11.77    9.67
   4   6  16    9.19    2.51
   4   6  17    0.13    2.43
   4  -8 -13   12.07    3.34
   4  -8 -13   16.38    3.88
   4  -8 -12    1.48    2.36
   4  -8 -12    0.73    2.35
   4  -8 -11    0.31    2.27
   4  -8 -11    1.05    2.43
   4   8 -10   -4.56   12.37
   4  -8 -10    0.94    2.45
   4  -8 -10    0.73    2.49
   4   8  -9   32.84   13.57
   4  -8  -9   38.56    4.08
   4   8  -8    1.74   13.63
   4  -8  -8    0.40    2.63
   4   8  -7    4.53   18.99
   4  -8  -7    3.49    2.27
   4  -8  -6    5.05    2.82
   4   8  -5   -2.57   21.41
   4  -8  -5    3.18    2.42
   4  -8  -4    8.98    2.70
   4   8  -4   11.51   21.23
   4  -8  -4   11.51    2.95
   4  -8  -3   21.20    3.30
   4   8  -3   30.33   22.12
   4  -8  -3   30.87    3.90
   4  -8  -2    9.03    2.91
   4   8  -2   26.23   19.30
   4  -8  -2    8.33    2.58
   4  -8  -1   22.82    3.47
   4   8  -1   43.03   17.21
  -4  -8   1   18.53    3.06
   4  -8  -1   22.34    3.18
   4  -8   0   85.24    6.31
   4   8   0   81.75   19.14
  -4  -8   0   65.54    6.87
   4  -8   1   32.89    4.26
   4   8   1   31.86   14.71
  -4  -8  -1   23.16    4.14
   4  -8   2   90.76    6.47
   4   8   2   84.03   10.33
  -4  -8  -2   64.35    5.94
  -4  -8  -3    0.88    1.80
   4  -8   4    1.37    2.91
  -4  -8  -4    2.03    2.32
   4  -8   4    1.08    2.17
   4  -8   5   12.12    3.49
  -4  -8  -5   10.26    2.58
   4  -8   5   10.73    2.72
   4  -8   6    0.09    3.39
  -4  -8  -6    1.04    2.35
   4  -8   6    0.46    2.27
   4  -8   7    4.50    3.28
  -4  -8  -7    6.04    2.24
   4  -8   7    7.05    2.63
   4  -8   8   -3.64    4.34
  -4  -8  -8    0.10    1.84
   4  -8   8    0.65    1.90
   4  -8   9    2.48    5.20
  -4  -8  -9    4.97    2.38
   4  -8   9    4.59    2.41
   4  -8  10    4.44    6.15
   4  -8  10    0.88    2.72
   4  -8  11    2.35    3.77
  -4  -8 -12    0.73    2.17
   4  -8  12   -4.47    5.05
  -5   1  23   24.25    5.08
  -5  -1  23   23.59    3.98
   5   1 -23   29.22    5.57
   5   1 -23   33.75    4.37
  -5   1  22   11.37    3.37
  -5  -1  22   11.02    2.94
   5  -1 -22   15.65    3.06
   5   1 -22   13.88    3.04
   5  -1 -22   15.52    3.53
   5   1 -22   18.04    3.59
  -5   1  21   15.60    3.82
  -5  -1  21   13.82    3.40
   5  -1 -21   16.15    3.01
   5   1 -21   16.81    2.91
   5  -1 -21   16.67    3.18
   5   1 -21   17.64    3.52
  -5   1  20    3.98    2.91
  -5  -1  20    4.14    2.39
  -5  -1  20    4.81    2.26
   5  -1 -20    5.55    2.21
   5   1 -20    7.65    2.55
  -5  -1  20    2.12    4.07
   5  -1 -20    5.40    2.52
  -5   1  19    3.67    3.00
  -5  -1  19    3.31    2.64
  -5  -1  19    4.23    2.18
   5  -1 -19    4.38    2.85
   5  -1 -19    3.89    2.52
  -5  -1  19    4.28    2.78
   5  -1 -19    4.66    2.64
  -5   1  18  117.83    7.42
  -5  -1  18  109.81    6.81
  -5  -1  18  110.67    8.23
   5  -1 -18  116.76   11.40
   5  -1 -18  120.47    6.71
  -5  -1  18  111.41    7.45
   5  -1 -18  139.59    7.56
  -5   1  17  143.19    7.23
  -5  -1  17  135.05    6.86
  -5  -1  17  129.21    6.99
   5  -1 -17  139.38    7.71
   5  -1 -17  134.86    8.86
  -5  -1  17  138.87    7.87
   5  -1 -17  171.54    8.05
  -5   1  16  826.38   25.15
  -5  -1  16  806.20   24.57
  -5  -1  16  754.63   24.56
   5  -1 -16  729.45   22.40
   5  -1 -16  775.51   26.44
   5   1 -16  832.60   28.24
   5  -1 -16  834.10   24.25
  -5  -1  16  835.66   26.13
  -5   1  15  521.73   17.16
  -5  -1  15  499.17   15.78
  -5   1  15  438.55   14.05
  -5  -1  15  489.20   15.68
   5  -1 -15  455.81   13.91
   5  -1 -15  555.12   16.14
   5   1 -15  419.49   17.43
  -5   1  15  511.88   16.96
  -5  -1  15  508.65   17.79
  -5   1  14   63.01    5.06
  -5  -1  14   64.73    5.09
  -5   1  14   52.05    4.90
  -5  -1  14   72.50    5.89
   5  -1 -14   52.97    4.39
   5  -1 -14   59.36    4.77
   5   1 -14   52.63   13.70
  -5   1  14   62.58    5.66
  -5  -1  14   67.05    5.94
  -5   1  13   69.71    5.45
  -5  -1  13   63.19    4.88
  -5   1  13   57.73    5.39
  -5   1  13   61.94    4.94
   5  -1 -13   73.75    5.14
   5   1 -13   26.10   11.54
  -5   1  13   66.28    5.46
  -5  -1  13   68.28    6.35
  -5   1  10  351.22   11.57
  -5  -1  10  363.78   12.49
   5  -1 -10  377.21   11.18
  -5   1   9   42.23    4.29
  -5  -1   9   40.83    4.32
   5  -1  -9   45.30    4.26
  -5   1   8 1112.52   19.61
  -5  -1   8 1059.30   22.03
   5  -1  -8 1156.13   19.14
  -5   1   7    7.69    2.39
  -5   1   7    9.15    3.59
  -5  -1   7    7.94    3.03
   5  -1  -7    9.67    2.97
  -5   1   6  837.63   21.14
  -5   1   6  837.69   18.05
  -5  -1   6  866.42   19.88
   5  -1  -6  872.06   14.94
  -5   1   5 1113.07   19.63
  -5  -1   5 1191.85   21.56
   5  -1  -5 1111.97   16.14
  -5   1   4  114.52    8.60
  -5  -1   4  121.23    7.62
   5  -1  -4  112.79    5.91
  -5   1   3  327.23   10.68
   5   1  -3  368.12   11.19
  -5   1   3  346.28   11.79
   5  -1  -3  371.46    9.74
   5   1  -2 1113.39   20.53
  -5   1   2 1182.59   22.15
   5   1  -1 2027.45   25.89
  -5   1   1 2093.09   29.83
   5  -1  -1 2163.36   24.01
   5  -1   1 6792.56   47.02
   5  -1   2 1298.69   21.85
   5   1   2 1292.92   20.73
   5  -1   3 2505.99   30.82
   5   1   3 2540.89   29.07
  -5   1  -4   81.05    5.97
   5  -1   4   83.71    5.57
   5   1   4   82.36    6.04
  -5   1  -5   92.45    6.52
   5  -1   5   82.45    5.58
   5   1   5   88.86    6.15
  -5   1  -6  231.45   11.48
   5  -1   6  218.95    9.00
   5   1   6  261.56    9.50
   5   1   7    9.26    2.92
   5   1   8  145.09    7.20
   5   1   9    3.92    2.66
   5   1  10   99.15    6.21
   5   1  10  102.43    6.27
   5   1  11    3.15    2.90
   5   1  11    4.42    2.42
   5   1  11    4.48    2.39
   5  -1  11    3.52    2.24
   5   1  12    2.61    3.21
   5   1  12    2.51    2.46
   5  -1  12    2.29    1.99
   5   1  13    0.13    2.30
   5   1  13   -0.28    1.87
   5  -1  13    0.40    1.93
   5   1  14   93.77    6.89
   5   1  14   95.75    6.13
   5  -1  14   82.15    6.35
   5   1  15    2.06    3.16
   5   1  15    1.81    2.69
   5   1  16   24.25    4.32
   5   1  16   24.78    3.12
   5   1  17   38.48    4.88
   5   1  17   33.85    3.44
   5   1  18   92.20    7.82
   5   1  18   88.04    6.01
   5  -1  18   99.28    5.73
   5   1  19   50.72    6.70
   5   1  19   44.76    4.75
   5  -1  19   49.92    5.14
   5   1  20    8.76    3.00
   5   1  20    7.59    2.45
   5  -1  20    7.33    2.38
   5  -1  21    3.50    2.32
  -5   3  22   47.57    6.22
  -5  -3  22   43.62    6.32
  -5  -3  22   47.02    5.46
   5  -3 -22   66.63    6.87
  -5   3  21    3.33    2.88
  -5  -3  21    4.26    2.46
  -5  -3  21    4.39    2.12
   5  -3 -21    5.91    2.84
  -5  -3  21   11.61    7.07
   5  -3 -21    4.77    2.39
  -5   3  20   78.54    7.93
  -5  -3  20   67.23    6.61
  -5  -3  20   80.75    5.73
   5  -3 -20   87.52    8.14
  -5  -3  20   74.65    9.04
  -5   3  19  158.61    9.22
  -5  -3  19  148.60    9.29
  -5  -3  19  160.76    7.05
   5  -3 -19  168.40    9.22
  -5  -3  19  137.50   10.29
  -5   3  18   27.65    4.56
  -5  -3  18   25.58    3.79
  -5  -3  18   26.74    3.37
   5  -3 -18   28.91    3.64
   5  -3 -18   32.62    3.92
  -5  -3  18   17.58    6.93
  -5   3  17  429.14   16.75
  -5  -3  17  421.73   13.27
  -5  -3  17  466.11   11.73
   5  -3 -17  477.71   14.48
   5  -3 -17  479.50   13.42
  -5  -3  17  384.82   12.31
  -5   3  16  126.39    8.67
  -5  -3  16  117.99    6.81
  -5  -3  16  149.44    6.70
   5  -3 -16  137.71    7.42
   5  -3 -16  139.59    6.70
  -5  -3  16  114.19    7.51
   5  -3 -16  129.51    6.83
  -5   3  15  216.53   11.18
  -5  -3  15  215.95   10.05
  -5  -3  15  275.56   10.56
   5  -3 -15  238.21   10.36
   5  -3 -15  233.32    9.70
  -5  -3  15  213.19   10.27
   5  -3 -15  210.65    9.21
  -5   3  14  306.96   13.81
  -5  -3  14  320.00   14.30
  -5   3  14  286.61   12.58
   5  -3 -14  343.47   13.12
   5  -3 -14  302.03   11.65
  -5  -3  14  310.96   12.95
   5  -3 -14  333.61   12.29
  -5   3  13  352.43   15.57
  -5  -3  13  369.62   14.27
  -5   3  13  327.45   12.25
   5  -3 -13  370.44   12.69
   5  -3 -13  302.44   10.76
  -5  -3  13  353.94   13.54
   5  -3 -13  349.80   12.23
  -5  -3  12    4.65    2.52
  -5   3  12    3.07    2.79
   5  -3 -12    4.35    1.96
   5  -3 -12    4.25    1.93
  -5  -3  12    5.95    3.41
   5  -3 -12    4.96    1.94
  -5  -3  11  873.25   24.63
   5  -3 -11  893.31   23.28
   5  -3 -11  824.22   17.13
   5  -3 -11  913.07   24.91
  -5  -3  11  888.29   24.81
   5  -3 -11  831.10   18.38
   5  -3 -10   82.13    4.86
  -5   3   9   72.47    5.70
   5  -3  -9   75.39    4.71
  -5   3   8   50.05    5.15
   5  -3  -8   51.45    4.29
  -5   3   7    1.46    3.28
   5  -3  -7    3.50    1.90
  -5   3   6  683.15   18.32
   5  -3  -6  736.43   17.68
  -5   3   5 1202.19   27.16
   5  -3  -5 1256.44   23.52
   5   3  -4   99.58    6.35
  -5   3   4   86.87    7.85
   5  -3  -4   93.28    5.06
   5   3  -3   14.30    3.46
  -5   3   3   15.01    4.19
   5  -3  -3   13.70    2.55
   5   3  -2   56.57    5.57
  -5   3   2   54.73    5.49
   5  -3  -2   54.34    3.99
   5   3  -1    2.23    2.90
  -5   3   1    1.93    3.25
   5  -3  -1    1.83    1.99
   5   3   0  166.85    8.74
  -5   3   0  154.19    8.42
   5  -3   0  182.75    7.50
   5   3   1   82.07    6.32
  -5   3  -1   76.40    7.51
   5   3   2  251.05   10.21
   5   3   3  109.07    6.90
   5   3   4   70.52    5.88
   5   3   5   48.42    4.96
   5   3   7    5.39    2.97
   5   3   8   23.99    3.86
   5   3   8   26.03    4.11
   5   3   8   25.98    3.89
   5   3   9   19.18    3.98
   5   3   9   19.42    3.40
   5   3   9   18.11    3.34
   5  -3   9   20.59    3.16
  -5  -3  -9   25.74    4.42
   5  -3   9   19.76    3.98
   5   3   9   19.55    3.28
   5   3  10   79.71    6.52
   5   3  10   84.26    6.07
   5  -3  10   88.59    6.15
   5  -3  10   87.63    8.03
   5   3  10   79.80    5.61
   5   3  11   88.25    6.64
   5   3  11   83.84    8.60
   5   3  11   77.37    6.40
   5  -3  11   90.26    6.15
   5  -3  11   92.29    7.35
   5   3  11   90.78    6.15
   5   3  12  106.10    8.36
   5   3  12   99.56    6.87
   5   3  12   89.56    6.98
   5  -3  12  109.50    7.56
   5  -3  12   99.98    7.96
   5   3  12  104.26    6.98
   5   3  13  295.86   11.67
   5   3  13  246.61   10.24
   5  -3  13  296.62   10.19
   5  -3  13  252.71   12.90
   5   3  13  296.01   10.75
   5   3  14   46.04    5.64
   5   3  14   37.99    4.91
   5  -3  14   44.16    4.42
   5  -3  14   36.70    9.80
   5   3  14   47.30    4.69
   5   3  15   18.05    3.96
   5   3  15   15.60    3.47
   5  -3  15   20.90    3.52
   5  -3  15   16.67   10.70
   5   3  15   16.26    3.33
   5   3  16   87.54    6.43
   5   3  16   67.54    6.62
   5  -3  16   82.73    6.00
   5   3  16   73.57    6.44
   5   3  17   42.02    5.20
   5  -3  17   37.07    4.80
   5   3  17   37.09    4.19
   5   3  18    1.72    3.19
   5  -3  18    1.32    2.12
   5   3  19    0.89    2.79
   5  -3  19    0.71    1.97
   5   3  20    0.01    2.61
   5  -3  20    0.28    1.92
   5  -5 -20   13.07    3.18
  -5  -5  20   17.19    8.08
   5  -5 -20   14.33    2.81
  -5   5  20   11.79    2.78
   5  -5 -19    9.25    3.01
  -5  -5  19    2.57   10.16
   5  -5 -19    8.09    2.58
  -5  -5  18    3.93    2.09
   5  -5 -18    5.37    2.88
  -5  -5  18    1.86   10.33
   5  -5 -18    4.80    2.60
  -5  -5  17   17.10    2.49
   5  -5 -17   19.97    3.64
  -5  -5  17   15.34    9.75
   5  -5 -17   19.69    2.92
  -5  -5  16    1.22    2.14
  -5  -5  16   -3.68    8.67
   5  -5 -16    2.32    2.46
  -5  -5  15   14.77    2.54
   5  -5 -15   16.50    3.40
  -5  -5  15   12.38    7.63
   5  -5 -14  170.96    8.15
  -5  -5  14  151.10   10.33
   5  -5 -13   12.98    2.79
  -5  -5  13    8.18    4.87
  -5  -5  12  204.76   10.16
   5  -5 -12  276.51   10.14
  -5  -5  12  262.45   12.20
  -5  -5  11  118.17    7.23
   5   5 -11  149.88   10.88
  -5   5  11  161.40    9.32
   5  -5 -11  161.45    8.55
  -5  -5  11  154.50    9.81
  -5  -5  10   37.41    4.60
   5   5 -10   33.51    8.91
  -5   5  10   44.79    5.23
   5  -5 -10   41.57    5.21
   5  -5 -10   43.72    4.08
  -5  -5  10   44.47    5.91
   5  -5 -10   49.74    4.56
  -5   5   9  246.43   11.49
   5  -5  -9  214.97   10.01
   5  -5  -9  236.17    9.56
   5  -5  -9  260.49   10.21
  -5  -5   8  111.12    6.89
  -5  -5   8  166.11   10.42
  -5   5   8  134.89    9.80
   5  -5  -8  123.54    8.73
   5  -5  -8  128.59    6.73
   5  -5  -8  150.22    8.43
  -5  -5   7    6.92    2.38
  -5  -5   7   11.02    6.59
  -5   5   7    6.89    2.73
   5  -5  -7    6.68    2.12
   5  -5  -7    5.98    1.75
   5  -5  -7    8.15    2.08
  -5  -5   6  108.86    7.08
  -5  -5   6  164.09   10.36
  -5   5   6  122.68    8.24
  -5  -5   6   88.37    6.12
   5  -5  -6  108.10    6.01
   5  -5  -6  125.71    6.74
  -5  -5   5   12.32    2.63
  -5  -5   5   16.57    5.21
  -5   5   5   12.26    3.24
  -5  -5   5   10.69    2.60
   5  -5  -5   12.13    2.27
   5  -5  -5   13.93    2.85
  -5  -5   4  423.84   12.87
   5  -5  -4  444.39   13.78
  -5  -5   4  436.19   15.19
   5  -5  -4  391.00   10.17
   5  -5  -4  459.99   13.24
  -5  -5   3   23.07    5.21
   5  -5  -3   23.38    3.44
  -5  -5   3   17.49    2.84
   5  -5  -3   18.96    2.39
   5  -5  -3   19.20    2.97
   5  -5  -2  380.93   12.00
  -5  -5   2  386.66   14.82
   5  -5  -2  372.16   10.38
   5  -5  -2  385.28   11.80
  -5  -5   1  145.69    9.43
   5  -5  -1  111.15    6.43
  -5  -5   1   98.58    6.81
   5  -5  -1  112.53    6.06
   5  -5  -1  115.84    7.94
  -5  -5   0    6.31    1.89
  -5  -5   0   11.61    4.25
   5  -5   0   11.42    2.75
  -5  -5   0   10.68    3.10
   5  -5   0    9.93    2.95
   5   5   1   70.41    6.37
   5   5   1  109.27    8.66
  -5  -5  -1  107.17    7.05
   5  -5   1  113.65    7.48
   5   5   2   26.53    4.04
   5  -5   2   36.63    4.35
   5   5   2   25.83   11.43
   5   5   2   34.24    4.63
  -5  -5  -2   38.39    4.35
   5  -5   2   40.56    4.48
   5   5   3    1.37    3.24
   5  -5   3    1.05    2.12
   5   5   3    1.43    2.85
   5  -5   3    1.38    2.23
   5   5   3    2.11    2.49
   5   5   4  367.67   16.24
   5  -5   4  376.34   14.16
   5   5   4  380.65   15.54
   5  -5   4  396.92   15.38
   5   5   4  363.55   16.41
   5   5   5   42.76    5.15
   5  -5   5   42.00    4.07
   5   5   5   29.68    4.20
  -5  -5  -5   46.52    5.03
   5  -5   5   41.13    4.96
   5   5   5   41.14    4.74
   5   5   6  219.92   11.21
   5  -5   6  304.68   11.46
   5   5   6  235.86   12.00
  -5  -5  -6  268.47   11.80
   5  -5   6  265.18   11.40
   5   5   6  235.99   10.63
   5   5   7   57.86    5.98
   5  -5   7   74.03    5.81
   5   5   7   57.78    5.15
  -5  -5  -7   66.46    5.58
   5  -5   7   61.41    5.36
   5   5   7   57.61    5.11
   5   5   8   66.20    6.30
   5  -5   8   71.27    5.85
   5   5   8   58.94    5.39
  -5  -5  -8   66.75    5.78
   5  -5   8   57.50    5.24
   5   5   8   60.96    5.40
   5   5   9  413.54   17.50
  -5  -5  -9  425.36   17.40
   5  -5   9  377.18   15.14
   5   5   9  408.90   15.65
   5   5  10   43.90    6.62
  -5  -5 -10   50.11    6.04
   5  -5  10   45.80    5.37
   5   5  10   43.71    4.72
   5   5  11  167.79   10.54
  -5  -5 -11  169.08    9.32
   5  -5  11  162.89   10.79
   5   5  12  132.42    8.74
  -5  -5 -12  133.89    9.84
   5  -5  12  120.41    8.36
   5   5  13   16.97    4.77
  -5  -5 -13   16.66    3.50
   5  -5  13   11.25    4.65
   5   5  13   16.54    3.52
   5   5  14   37.03    5.33
  -5  -5 -14   32.11    5.08
   5  -5  14   22.54    8.14
   5   5  14   33.21    3.85
   5   5  15   19.61    4.47
   5  -5  15   17.28    8.97
   5   5  15   18.05    3.34
   5   5  16   68.07    8.03
   5  -5  16   50.93   11.80
   5   5  16   63.04    6.93
   5   5  17   21.68    4.13
   5   5  17   23.47    3.56
   5   5  18   26.22    4.96
  -5  -7  16   11.76    2.27
   5  -7 -16   16.82    3.39
   5  -7 -16   18.10    3.43
  -5   7  16   14.49    3.12
  -5  -7  15   48.74    3.80
   5  -7 -15   70.66    6.30
   5  -7 -15   78.59    5.88
  -5   7  15   64.38    5.91
  -5  -7  14    6.28    1.77
   5  -7 -14   10.72    3.36
   5  -7 -14    9.49    2.67
  -5  -7  13    5.82    1.90
   5  -7 -13    6.52    2.70
   5  -7 -13    9.13    2.72
   5   7 -12   25.58    7.96
  -5  -7  12   17.27    2.55
   5  -7 -12   16.66    3.34
   5  -7 -12   19.36    3.22
   5   7 -11   26.87   11.74
   5  -7 -11   24.68    3.74
   5  -7 -11   29.23    3.67
   5   7 -10  111.74   12.98
   5  -7 -10   92.76    7.35
   5  -7 -10  107.48    6.68
   5   7  -9   -3.88   16.35
   5  -7  -9    4.50    2.66
   5   7  -8   35.74   13.91
   5   7  -7   46.59   18.56
   5   7  -6  114.55   16.01
   5  -7  -4   22.11    3.40
   5   7  -4   25.39   15.90
  -5  -7   4   15.84    3.16
   5  -7  -4   21.97    3.01
   5  -7  -3    3.33    2.06
   5   7  -3   21.94   19.15
  -5  -7   3    1.81    2.26
   5  -7  -3    4.56    2.63
   5  -7  -2   13.60    2.70
   5   7  -2    0.00   15.25
  -5  -7   2   10.45    2.88
   5  -7  -2   13.33    2.91
   5  -7  -1   71.86    6.21
   5   7  -1   58.48   15.07
  -5  -7   1   50.70    5.03
   5  -7  -1   63.01    5.86
   5  -7   0   22.69    3.30
   5   7   0   21.11   17.07
  -5  -7   0   16.47    3.06
   5  -7   0   21.19    3.49
   5  -7   1   26.86    3.53
   5   7   1   30.76   14.97
  -5  -7  -1   22.37    3.47
   5  -7   1   25.91    3.16
   5   7   2   49.19    9.49
  -5  -7  -2   29.04    3.56
   5  -7   2   37.93    4.29
   5  -7   3    1.28    2.70
  -5  -7  -3    0.28    2.38
   5  -7   3    1.04    2.41
   5  -7   4   67.98    5.58
  -5  -7  -4   46.47    3.99
   5  -7   4   58.25    5.37
  -5  -7  -5   29.69    3.86
   5  -7   5   40.96    5.03
  -5  -7  -5   35.28    3.73
   5  -7   5   37.22    4.62
  -5  -7  -6   67.72    5.69
   5  -7   6  101.29    8.02
  -5  -7  -6   86.26    6.03
   5  -7   6   87.51    6.31
   5   7   6   80.81    7.04
  -5  -7  -7   59.98    5.21
   5  -7   7   98.02    7.07
   5  -7   7   91.21    7.10
   5   7   7   80.10    6.87
  -5  -7  -8   56.98    4.91
   5  -7   8   79.22    6.70
   5  -7   8   76.09    6.15
   5   7   8   81.53    7.26
   5  -7   9   38.54    5.30
  -5  -7  -9   51.36    5.00
   5  -7   9   55.84    5.73
   5   7   9   47.87    5.05
  -5  -7 -10    4.71    2.23
   5  -7  10    3.49    2.76
   5   7  10    3.99    2.92
  -5  -7 -11   29.31    4.14
   5  -7  11   28.60    4.54
   5   7  11   33.32    4.78
  -5  -7 -12    0.65    1.72
  -5  -7 -12    1.22    2.17
   5  -7  12   -4.04    4.65
   5   7  12    1.11    2.52
  -5  -7 -13    1.65    1.66
  -5  -7 -13    1.83    2.00
   5  -7  13   -6.40    6.53
   5   7  13    1.59    2.41
   5   7  14    1.11    2.36
   5   9  -9   12.72    4.13
   5  -9  -9   14.79    3.43
   5   9  -8   18.81    5.02
   5  -9  -8   20.09    3.62
   5   9  -7   -1.69    5.64
   5  -9  -7   -0.31    2.35
   5  -9  -6   30.59    3.93
   5   9  -5   12.14    7.23
   5  -9  -5    1.53    2.48
   5   9  -4   -0.56    7.44
   5  -9  -3   20.79    5.03
   5   9  -3   29.20    7.62
   5  -9  -3   25.34    3.96
   5  -9  -2   35.90    5.78
   5   9  -2   57.62    8.66
   5  -9  -1   65.92    7.71
   5   9  -1   83.22    9.47
   5  -9   0   96.36   10.17
   5   9   0   99.39   11.08
   5  -9   1   93.06    7.22
  -5  -9  -1   77.32    7.10
   5  -9   2   21.17    4.90
  -5  -9  -2   13.36    3.27
   5  -9   2   17.16    2.95
   5  -9   3    4.04    4.75
  -5  -9  -3    1.40    2.20
   5  -9   3    1.68    2.14
  -5  -9  -4    2.43    2.14
   5  -9   4    1.81    2.17
   5  -9   5   -5.67    5.55
  -5  -9  -5    1.14    2.06
   5  -9   5    0.52    2.08
   5  -9   6   30.57    7.01
  -5  -9  -6   31.67    4.66
   5  -9   6   33.17    5.03
   6   0 -23    0.52    2.08
   6   0 -23    0.64    2.26
   6   0 -22   70.89    7.65
   6   0 -22   77.29    7.82
   6   0 -21    2.15    2.49
   6   0 -21    2.39    2.67
  -6   0  20  427.09   13.61
   6   0 -20  479.78   12.69
   6   0 -20  488.14   16.55
  -6   0  19    1.32    2.75
   6   0 -19    0.28    2.20
   6   0 -19    1.04    2.69
  -6   0  18   24.08    3.77
   6   0 -18   24.87    5.51
  -6   0  18   23.10    4.29
  -6   0  17    0.03    2.48
   6   0 -17    0.62    2.17
  -6   0  17    0.46    2.63
  -6   0  16  114.25    7.74
   6   0 -16  134.32    8.74
  -6   0  16  117.43    7.97
  -6   0  15    0.70    2.79
  -6   0  15    0.16    2.03
  -6   0  15   -0.52    3.47
  -6   0  14    2.98    2.85
  -6   0  14    2.11    1.86
   6   0 -14    2.03    5.73
  -6   0  14    2.67    2.35
  -6   0  13    0.04    2.48
  -6   0  13   -0.06    2.21
  -6   0  13    0.24    1.71
   6   0 -13    3.58    5.64
  -6   0  13    0.12    2.24
  -6   0  12  425.00   13.45
   6   0 -12  518.22   16.67
  -6   0  11    1.93    2.02
   6   0 -11    4.13    5.46
  -6   0  10  311.26   10.91
   6   0 -10  348.48   12.44
  -6   0   9   -0.24    2.48
   6   0  -9    3.44    4.80
  -6   0   8 2245.60   28.68
   6   0  -8 2470.95   28.06
  -6   0   7    2.69    3.47
   6   0  -7    3.67    3.07
  -6   0   6 1441.55   22.69
   6   0  -6 1425.31   24.85
  -6   0   5   11.80    4.45
   6   0  -5   15.81    3.00
  -6   0   4  481.37   14.15
   6   0  -4  421.21   12.92
  -6   0   3    1.75    3.80
   6   0  -3    3.44    1.97
   6   0  -2   21.13    4.17
   6   0  -2   22.60    4.90
   6   0  -1    1.35    3.55
   6   0   0  736.16   16.17
   6   0   1    0.03    2.33
   6   0   2 1945.46   26.61
   6   0   3   10.76    2.92
   6   0   4  365.73   11.25
   6   0   5    0.45    2.33
   6   0   6  389.20   12.28
   6   0   7    4.16    1.96
   6   0   8   65.21    4.78
   6   0   9    1.29    2.41
   6   0  10    6.44    2.29
   6   0  14    2.18    2.48
   6   0  15    0.34    2.45
   6   0  16   10.94    2.70
   6   0  17   -0.18    1.77
   6   0  18   18.63    3.09
   6   0  20    9.98    2.66
  -6   2  23    8.88    3.19
  -6  -2  23    7.28    2.75
   6  -2 -23   12.38    2.91
   6   2 -23   10.85    2.85
  -6   2  22    5.15    2.92
  -6  -2  22    4.02    2.70
   6   2 -22    5.46    2.52
   6  -2 -22    6.86    2.84
   6   2 -22    5.69    2.69
  -6   2  21   30.70    4.86
  -6  -2  21   29.86    4.23
  -6  -2  21   29.81    4.84
   6  -2 -21   35.50    5.46
  -6  -2  21   20.19    4.91
   6  -2 -21   46.22    5.18
  -6   2  20    1.46    2.51
  -6  -2  20    1.26    2.64
  -6  -2  20    1.28    2.00
   6  -2 -20    1.87    2.64
   6  -2 -20    1.31    2.11
   6  -2 -20    1.65    2.66
  -6   2  19   20.43    3.85
  -6  -2  19   17.48    3.41
  -6  -2  19   16.81    2.61
   6  -2 -19   21.59    3.58
   6  -2 -19   21.84    3.33
  -6  -2  19   15.05    4.26
   6  -2 -19   23.15    3.39
  -6   2  18    0.83    3.04
  -6  -2  18    1.08    2.05
  -6  -2  18    0.71    1.51
   6  -2 -18    1.25    2.55
   6  -2 -18    0.76    1.92
  -6  -2  18    0.56    2.23
   6  -2 -18    1.25    1.99
  -6   2  17   29.90    4.74
  -6  -2  17   26.84    3.74
  -6  -2  17   30.24    3.30
   6  -2 -17   31.74    4.04
   6  -2 -17   30.96    3.53
  -6  -2  17   26.21    4.02
   6  -2 -17   33.06    3.73
  -6   2  16   75.20    6.44
  -6  -2  16   80.10    6.13
  -6  -2  16   84.44    6.03
   6  -2 -16   78.88    5.61
  -6  -2  16   73.97    6.07
   6  -2 -16   86.71    5.73
  -6   2  15    6.62    3.09
  -6  -2  15    6.93    2.67
  -6   2  15    5.21    2.57
   6  -2 -15    7.96    2.73
   6  -2 -15    6.18    2.15
   6   2 -15    6.59   15.08
  -6  -2  15    6.27    3.58
   6  -2 -15    7.68    2.63
  -6   2  14    5.30    2.92
  -6  -2  14    6.73    2.95
  -6   2  14    3.77    2.08
   6  -2 -14    6.16    2.57
   6  -2 -14    5.52    2.12
   6   2 -14    5.55   15.43
   6  -2 -14    6.22    2.11
  -6  -2  14    3.93    2.72
   6  -2 -14    6.31    2.30
  -6   2  13  320.76   14.71
  -6  -2  13  347.75   13.18
  -6   2  13  288.85   11.22
  -6  -2  13  301.60   12.55
   6  -2 -13  311.80   10.97
   6  -2 -13  293.57   10.60
  -6  -2  13  337.03   13.70
   6  -2 -13  306.34   12.63
  -6   2  12   33.42    4.75
  -6  -2  12   33.32    3.53
  -6   2  12   28.64    3.52
  -6  -2  12   31.39    3.96
   6  -2 -12   31.56    3.06
   6  -2 -12   35.22    3.92
  -6  -2  12   32.34    4.50
   6  -2 -12   31.68    3.52
  -6   2  11   33.15    4.11
   6  -2 -11   31.97    3.18
  -6   2  10    4.53    3.13
   6  -2 -10    4.32    2.12
  -6   2   9  161.82    8.11
   6  -2  -9  151.63    6.34
  -6  -2   8   -0.10    2.00
   6  -2  -8    0.13    1.75
  -6   2   7  282.69   10.97
  -6  -2   7  273.34   11.22
   6  -2  -7  284.00    9.12
  -6   2   6  363.92   11.95
  -6  -2   6  341.65   12.80
   6  -2  -6  362.74   10.38
  -6   2   5   43.58    5.24
  -6  -2   5   41.14    4.99
   6  -2  -5   45.25    3.83
   6   2  -4  154.25    7.72
  -6   2   4  142.86    8.25
   6  -2  -4  156.79    7.13
   6   2  -3    1.90    2.94
  -6   2   3    2.15    3.83
   6  -2  -3    1.25    2.20
   6   2  -2    7.02    3.43
  -6   2   2    6.27    3.95
   6  -2  -2    7.14    2.20
   6   2  -1    7.51    3.53
  -6   2   1    5.02    3.62
   6  -2  -1    6.18    2.11
   6   2   0  980.64   17.94
  -6   2   0 1028.96   21.45
   6   2   1   69.31    5.49
  -6   2  -1   71.79    6.65
  -6   2  -2 1066.41   24.50
  -6   2  -3  453.36   17.40
   6   2   4 2403.61   39.27
   6   2   5  181.49    8.37
   6   2   6   57.71    5.20
   6   2   7  424.60   13.45
   6   2   8  111.22    6.65
   6   2   8   99.86    6.44
   6   2   9  132.61    8.06
   6   2   9  142.90    7.54
   6   2   9  135.33    7.53
   6  -2   9  139.59    7.62
   6   2   9  136.30    7.02
   6   2  10  289.67   12.83
   6   2  10  304.78   12.10
   6   2  10  287.71   11.98
   6  -2  10  301.32   11.88
   6   2  10  289.44   11.34
   6   2  11    5.70    3.21
   6   2  11    6.04    2.52
   6   2  11    5.60    2.72
   6  -2  11    9.59    2.97
   6   2  11    5.85    2.73
   6   2  12  224.01   12.95
   6   2  12  244.16   11.43
   6   2  12  242.96   11.05
   6  -2  12  255.88   11.11
   6   2  12  241.41   10.91
   6   2  13   90.03    7.13
   6   2  13   90.48    5.88
   6  -2  13   89.60    5.78
   6   2  13   87.82    6.43
   6   2  14  376.05   16.15
   6   2  14  370.14   14.42
   6  -2  14  364.93   14.42
   6   2  14  340.40   14.03
   6   2  15   44.35    4.78
   6   2  15   43.50    4.42
   6  -2  15   43.37    4.28
   6   2  16  337.68   15.10
   6   2  16  317.28   10.94
   6  -2  16  349.40   10.96
   6   2  17    2.98    2.63
   6   2  17    2.43    2.30
   6  -2  17    3.13    2.49
   6   2  18   61.56    7.08
   6   2  18   53.97    6.19
   6  -2  18   55.54    5.79
   6   2  19  154.26   12.46
   6   2  19  139.61    8.98
   6  -2  19  155.17    7.81
   6  -2  20    3.88    2.38
  -6  -4  21   14.59    2.72
   6  -4 -21   18.90    3.71
  -6  -4  21   12.09    5.70
  -6   4  21   16.67    3.18
  -6  -4  20    0.16    2.17
  -6  -4  20   -0.59    1.93
   6  -4 -20   -0.04    2.64
  -6  -4  20    2.08    7.07
  -6  -4  19    0.34    2.05
  -6  -4  19    1.62    2.08
   6  -4 -19    0.59    2.33
  -6  -4  19   -0.86    7.77
  -6  -4  18   73.03    6.70
  -6  -4  18   84.72    4.93
   6  -4 -18   92.66    6.80
  -6  -4  18   69.14    7.29
   6  -4 -18  104.42    6.28
  -6  -4  17   11.18    2.63
  -6  -4  17   13.02    2.55
   6  -4 -17   13.02    3.19
  -6  -4  17    9.75    4.74
   6  -4 -17   14.42    2.64
  -6  -4  16   46.78    4.97
  -6  -4  16   64.48    4.74
  -6  -4  16   48.05    5.15
   6  -4 -16   58.48    4.26
  -6  -4  15   13.10    2.79
  -6  -4  15    9.62    4.39
   6  -4 -15   16.61    2.63
  -6  -4  14   96.48    6.76
   6  -4 -14  107.58    6.59
  -6  -4  14   92.71    7.22
   6  -4 -14  114.41    6.43
  -6  -4  13    5.81    2.20
   6  -4 -13    6.83    2.42
  -6  -4  13    5.24    3.52
   6  -4 -13    5.64    2.33
  -6  -4  12   19.51    2.97
  -6   4  12   18.59    3.21
   6  -4 -12   21.84    3.44
   6  -4 -12   18.87    2.66
  -6  -4  12   17.91    3.24
   6  -4 -12   20.89    2.76
  -6  -4  11    5.32    2.02
  -6   4  11    4.48    2.41
   6  -4 -11    7.11    2.58
   6  -4 -11    7.56    2.02
   6  -4 -11    8.14    2.05
  -6  -4  10  391.44   14.82
   6   4 -10  372.38   15.65
  -6   4  10  384.70   15.84
   6  -4 -10  360.34   14.77
   6  -4 -10  394.64   13.17
   6  -4 -10  381.66   12.92
   6  -4 -10  419.65   14.22
  -6  -4   9    7.62    2.52
   6   4  -9    5.05    7.16
  -6   4   9    7.08    3.24
  -6  -4   9    6.77    2.18
   6  -4  -9    8.64    3.80
   6  -4  -9   10.82    2.30
   6  -4  -9    9.78    2.35
   6  -4  -9    8.55    2.18
  -6  -4   8   37.46    3.65
   6   4  -8   30.14    7.79
  -6   4   8   36.95    4.53
  -6  -4   8   34.21    4.44
   6  -4  -8   34.76    4.25
   6  -4  -8   38.80    3.47
   6  -4  -8   35.86    3.93
   6  -4  -8   38.34    3.50
   6   4  -7    2.57    6.65
  -6   4   7    7.81    3.09
   6  -4  -7    7.68    2.48
   6  -4  -7    7.19    2.33
   6  -4  -7    7.32    2.23
  -6   4   6   21.87    4.44
   6  -4  -6   25.80    2.72
  -6   4   5  544.33   16.35
   6  -4  -5  497.38   12.44
  -6   4   4   17.67    3.85
   6  -4  -4   16.21    2.52
   6   4  -3   22.27    3.82
  -6   4   3   19.46    3.85
   6  -4  -3   15.93    2.38
   6   4  -2  119.47    7.93
   6  -4  -2   90.15    5.14
   6   4  -1  662.72   18.93
   6  -4  -1  617.14   15.19
   6   4   0  204.61   13.05
   6  -4   0  228.22    9.10
   6   4   1  170.61    9.31
   6   4   2    9.50    3.39
   6   4   3  172.95    8.82
   6   4   4   15.11    4.26
   6  -4   4   14.86    2.35
   6   4   4   13.35    3.12
  -6  -4  -4   16.54    3.43
   6   4   4   15.35    3.15
   6   4   5   71.90    6.27
   6  -4   5   78.84    4.96
   6   4   5   75.38    5.70
   6   4   5   55.81    5.51
  -6  -4  -5   84.26    6.56
   6  -4   5   74.35    6.71
   6   4   5   67.98    5.24
   6   4   6   26.19    4.34
   6  -4   6   28.89    3.34
   6   4   6   22.70    3.82
   6   4   6   20.64    3.50
  -6  -4  -6   28.16    3.93
   6  -4   6   26.25    4.26
   6   4   6   25.39    3.70
   6   4   7   19.12    4.51
   6  -4   7   18.38    3.16
   6   4   7   20.18    3.89
   6   4   7   14.80    3.50
  -6  -4  -7   25.06    4.37
   6  -4   7   18.02    3.13
   6   4   7   17.83    3.18
   6   4   8    2.38    2.94
  -6  -4  -8    4.22    3.21
   6  -4   8    3.13    2.36
   6   4   9   70.38    5.88
  -6  -4  -9   98.36    7.56
   6  -4   9   88.58    8.49
   6   4  10    1.19    2.73
  -6  -4 -10    2.21    2.92
   6  -4  10    0.92    1.83
   6   4  10    1.41    2.84
   6   4  11   44.10    4.62
   6  -4  11   47.60    4.53
  -6  -4 -11   60.06    7.05
   6  -4  11   48.05    5.32
   6   4  11   57.56    5.14
   6   4  12    8.48    3.13
   6  -4  12   10.41    2.61
   6  -4  12    4.74    4.28
   6   4  12   10.07    2.72
   6   4  13    4.48    4.20
   6  -4  13    2.73    2.35
   6  -4  13    0.45    6.81
   6   4  13    2.87    2.29
   6   4  14    7.60    4.01
   6  -4  14    6.50    2.29
   6   4  14    7.04    2.95
   6   4  15    0.33    3.64
   6  -4  15    0.85    1.65
   6   4  15    1.28    2.48
   6   4  16   23.83    4.83
   6  -4  16   19.94    3.19
   6   4  16   22.98    3.59
   6   4  17   21.04    3.96
   6  -4  17   17.95    2.98
   6   4  17   21.66    3.31
   6   4  18    1.05    2.58
   6  -4  18    0.27    1.60
  -6  -6  19    0.94    1.96
  -6  -6  18   33.66    3.93
   6  -6 -18   41.90    5.83
   6  -6 -18   48.54    5.43
  -6  -6  17    1.51    1.80
   6  -6 -17    2.03    2.61
  -6  -6  16    0.09    1.81
   6  -6 -16    0.49    2.69
  -6  -6  15    5.88    2.02
   6  -6 -15    6.95    2.81
  -6  -6  14    0.09    1.62
   6  -6 -14    0.55    2.64
   6  -6 -13    6.41    2.70
   6   6 -12   21.20    7.54
   6  -6 -12   14.68    3.04
   6  -6 -12   18.60    3.12
   6   6 -11   70.48    9.78
   6  -6 -11   58.20    4.88
   6  -6 -11   55.20    4.62
   6   6 -10  210.31   16.75
   6  -6 -10  173.15    9.90
   6  -6 -10  186.33    9.09
   6   6  -9    6.34   14.28
   6  -6  -9    5.26    2.24
   6  -6  -9    4.84    2.58
   6   6  -8   -1.47   11.83
   6  -6  -8    5.58    2.63
   6  -6  -8    5.98    2.58
  -6  -6   7   19.91    3.10
   6   6  -7   18.87   16.20
   6  -6  -7   26.59    3.61
  -6  -6   6   11.00    2.21
   6   6  -6   22.61   13.23
  -6  -6   6   12.53    2.90
   6  -6  -6   15.03    2.52
  -6  -6   5   57.70    5.06
   6  -6  -5   84.24    7.32
  -6  -6   5   63.56    5.72
   6  -6  -5   63.80    4.74
   6  -6  -5   84.48    5.78
  -6  -6   4  298.04   13.87
   6  -6  -4  387.08   15.46
   6   6  -4  327.05   20.98
  -6  -6   4  289.67   12.98
   6  -6  -4  260.34   13.26
   6  -6  -4  381.59   14.62
  -6  -6   3  164.05    8.89
   6  -6  -3  240.98   12.77
   6   6  -3  201.70   19.29
  -6  -6   3  181.80    9.95
   6  -6  -3  193.50   10.07
   6  -6  -3  230.29   10.35
  -6  -6   2  190.22   10.78
   6  -6  -2  273.02   11.71
   6   6  -2  236.60   20.28
  -6  -6   2  195.77   11.63
   6  -6  -2  233.90   10.73
  -6  -6   1   57.35    5.82
   6  -6  -1   93.72    6.40
   6   6  -1   70.51   16.96
  -6  -6   1   67.29    5.52
   6  -6  -1   82.24    5.52
  -6  -6   0   11.67    2.42
   6  -6   0   23.18    3.62
   6   6   0   23.16   13.02
  -6  -6   0   15.54    3.12
   6  -6   0   15.17    2.66
  -6  -6  -1   15.52    2.51
   6  -6   1   22.40    3.19
   6   6   1   23.95   11.77
  -6  -6  -1   20.09    3.47
   6  -6   1   23.22    3.18
  -6  -6  -2    5.63    1.89
   6   6   2   21.11    7.44
  -6  -6  -2    7.63    3.00
   6  -6   2    7.10    2.66
   6  -6   3  403.46   16.05
  -6  -6  -3  349.06   14.24
   6  -6   3  425.18   16.26
   6   6   4  252.16   12.50
   6  -6   4  366.41   13.96
   6  -6   4  301.81   13.47
   6   6   4  283.80   14.79
   6   6   5  278.59   12.35
  -6  -6  -5  281.20   11.19
   6  -6   5  369.11   13.11
   6   6   5  302.94   13.96
   6   6   6   90.79    7.13
   6  -6   6  138.05    8.06
  -6  -6  -6  107.31    7.94
   6  -6   6  112.96    8.52
   6   6   6  101.93    8.08
   6   6   7   24.56    4.26
   6  -6   7   33.05    3.92
  -6  -6  -7   24.60    3.65
   6  -6   7   28.15    3.62
   6   6   7   30.12    4.25
   6   6   8   27.38    4.38
   6  -6   8   34.85    4.08
  -6  -6  -8   32.19    4.16
   6  -6   8   29.58    3.83
   6   6   8   33.87    4.41
   6   6   9    5.09    3.68
   6  -6   9    5.76    2.46
  -6  -6  -9    4.84    2.46
   6  -6   9    5.02    2.78
   6   6   9    4.13    2.52
   6   6  10   33.82    4.83
  -6  -6 -10   39.46    4.63
   6  -6  10   40.81    4.99
   6   6  10   43.25    4.68
   6   6  11   14.24    4.07
  -6  -6 -11   11.12    2.87
   6  -6  11    9.59    3.12
   6   6  11   12.87    2.92
   6   6  12   12.92    3.68
  -6  -6 -12   11.19    2.70
   6  -6  12    8.18    5.14
   6   6  12   13.53    3.28
   6   6  13    3.62    2.98
  -6  -6 -13    4.78    2.26
   6  -6  13    4.68    6.32
   6   6  13    5.55    2.87
   6   6  14   17.01    3.53
   6  -6  14   14.33    8.37
   6   6  15    8.37    3.00
   6   6  15   10.13    2.61
   6  -8 -13   22.24    4.04
   6   8 -12    5.67    2.91
   6  -8 -12    5.69    2.60
   6   8 -11    0.18    3.43
   6   8 -10   16.84    6.03
   6   8  -9   21.65    6.49
   6   8  -8    5.34    8.77
   6   8  -7   11.98    8.98
   6  -8  -6   11.68    3.70
   6   8  -5  109.94   13.79
   6  -8  -5  106.56    6.56
   6  -8  -4   30.02    4.47
   6   8  -4   34.88   12.69
   6  -8  -4   45.82    5.02
   6  -8  -3   38.87    5.32
   6   8  -3   61.10   10.96
  -6  -8   3   39.11    5.60
   6  -8  -3   51.56    5.67
   6  -8  -2   31.73    3.85
   6   8  -2   50.60    8.80
  -6  -8   2   28.49    4.25
   6  -8  -2   37.40    4.01
   6  -8  -1   10.63    2.75
   6   8  -1   17.64    8.28
  -6  -8   1    8.98    2.98
   6  -8  -1   12.38    2.55
   6  -8   0    3.31    2.75
   6   8   0    7.78    5.64
  -6  -8   0    2.63    2.43
   6  -8   0    3.61    2.27
   6  -8   1    3.41    2.29
   6   8   1    1.62    4.50
  -6  -8  -1    2.60    2.38
   6  -8   1    3.36    2.38
   6  -8   2    4.97    2.79
  -6  -8  -2    3.03    2.41
   6  -8   2    3.65    1.92
  -6  -8  -3    7.53    2.24
   6  -8   3    9.58    2.73
   6  -8   4    3.43    2.85
  -6  -8  -4    3.10    2.38
   6  -8   4    3.06    2.26
   6  -8   5    2.48    2.78
  -6  -8  -5    1.47    1.93
   6  -8   5    3.00    2.27
   6  -8   6   53.48    6.28
  -6  -8  -6   46.16    5.40
   6  -8   6   50.55    6.12
   6  -8   7    4.99    3.21
  -6  -8  -7    7.23    2.60
   6  -8   7    6.41    2.52
   6  -8   8    1.57    3.41
   6  -8   8    1.38    2.11
   6  -8   9   17.80    5.09
  -6  -8  -9   14.34    2.78
   6  -8   9   12.68    3.19
  -6  -8 -10    0.43    2.08
   6  -8  10    1.96    3.73
  -7   1  23   68.49    7.75
  -7  -1  23   63.68    7.45
   7   1 -23   88.79    9.09
   7  -1 -23  100.75    8.86
   7   1 -23   94.64    9.41
  -7   1  22   33.88    5.15
  -7  -1  22   34.67    4.88
   7  -1 -22   40.76    5.32
   7   1 -22   40.89    5.27
   7  -1 -22   45.00    6.00
   7   1 -22   42.25    5.91
  -7   1  21    4.72    3.31
   7  -1 -21    4.08    2.66
   7  -1 -21    5.02    2.51
   7   1 -21    4.57    2.66
   7  -1 -21    6.16    2.87
   7   1 -21    4.56    2.35
  -7   1  20   88.67    8.24
   7  -1 -20   94.69    9.78
   7  -1 -20   85.74    5.20
   7  -1 -20  111.56    7.28
   7   1 -20   94.96    6.92
  -7   1  19   59.58    5.58
   7  -1 -19   61.44    6.76
   7  -1 -19   65.59    5.08
  -7  -1  19   52.28    5.42
   7  -1 -19   78.05    5.88
  -7   1  18   26.07    4.56
   7  -1 -18   29.29    4.01
   7   1 -18   23.18    5.43
  -7  -1  18   21.88    3.58
   7  -1 -18   36.45    4.19
  -7   1  17  421.08   17.92
  -7  -1  17  331.28   14.31
   7  -1 -17  404.70   15.22
  -7  -1  17  371.45   15.66
   7  -1 -17  484.80   18.97
  -7   1  16    6.99    2.58
  -7  -1  16    7.99    3.06
  -7  -1  16    6.87    2.41
   7  -1 -16   10.66    2.81
  -7  -1  16    7.25    2.79
   7  -1 -16    9.46    2.48
  -7   1  15  270.16   13.17
  -7  -1  15  279.62   12.40
  -7   1  15  215.95   10.56
  -7  -1  15  241.95   11.76
   7  -1 -15  249.06   10.35
   7  -1 -15  248.50   14.76
   7   1 -15  334.71   15.60
  -7  -1  15  264.56   12.25
   7  -1 -15  291.95   12.59
  -7   1  14   15.05    3.07
  -7  -1  14   14.94    3.53
  -7   1  14   11.45    2.51
  -7   1  14   13.21    3.03
  -7  -1  14   11.27    2.88
   7  -1 -14   14.55    3.00
   7   1 -14   14.54    8.91
  -7  -1  14   13.15    3.55
   7  -1 -14   16.20    3.00
  -7   1  13   52.48    5.60
  -7  -1  13   51.49    4.91
  -7   1  13   38.81    3.92
  -7   1  13   45.40    4.32
  -7  -1  13   46.49    5.06
   7  -1 -13   50.35    4.08
   7   1 -13   51.80   10.23
  -7  -1  13   41.22    5.49
   7  -1 -13   43.04    5.18
  -7   1  12  263.46   11.85
  -7  -1  12  287.65   13.10
  -7   1  12  227.41    9.50
  -7   1  12  273.45   10.36
  -7  -1  12  261.16   10.45
   7  -1 -12  239.11    8.77
   7   1 -12  263.06   13.64
   7  -1 -12  243.79    9.92
   7  -1 -12  243.98   10.93
  -7   1  11  288.88   10.56
  -7  -1  11  271.72   12.07
   7  -1 -11  253.56    8.63
   7   1 -11  267.53   12.96
  -7   1  10   80.99    5.94
  -7  -1  10   80.58    5.94
   7  -1 -10   76.97    4.56
   7   1 -10   67.61    8.83
  -7   1   9   75.62    5.94
  -7  -1   9   65.85    5.51
   7  -1  -9   68.40    4.38
   7   1  -9   63.10    9.23
  -7   1   8  146.81    7.75
  -7  -1   8  137.02    7.60
   7  -1  -8  140.82    8.31
   7   1  -8  108.04    8.89
  -7   1   7  106.14    6.56
  -7  -1   7  101.63    6.55
   7  -1  -7  101.85    5.57
   7   1  -7   88.12    7.71
  -7   1   6  548.22   16.11
  -7  -1   6  640.31   15.96
   7  -1  -6  553.78   14.65
  -7   1   5  253.56   11.68
  -7  -1   5  288.52   10.81
   7  -1  -5  281.96    9.56
  -7   1   4  360.96   13.29
  -7   1   4  379.36   12.26
  -7  -1   4  374.93   12.32
   7  -1  -4  419.61   11.92
   7   1  -3  360.04   11.18
  -7   1   3  339.51   12.52
   7  -1  -3  381.42   11.37
   7   1  -2  972.26   18.35
  -7   1   2  904.80   19.38
   7  -1  -2  913.22   18.77
  -7   1   1  709.22   17.45
  -7   1   0  559.16   16.38
   7  -1   1  337.64   11.02
   7   1   1  360.87   11.02
   7  -1   2    1.31    2.70
   7   1   2    1.28    3.24
   7  -1   3  191.10   10.02
   7   1   3  219.07    9.15
   7  -1   4   63.34    4.77
   7   1   4   81.87    5.83
   7  -1   5   61.23    4.69
   7   1   5   68.99    4.99
   7   1   6    2.66    2.14
   7   1   7    2.60    2.72
   7   1   8    4.60    2.60
   7  -1   8    5.09    2.46
   7   1   9   14.39    3.15
   7   1   9   14.16    2.88
   7  -1   9   15.46    3.16
   7   1   9   13.53    2.61
   7   1  10   12.59    3.00
   7   1  10   12.38    2.54
   7   1  10   14.19    3.40
   7  -1  10   13.29    2.97
   7   1  11    5.60    3.01
   7   1  11    4.32    2.66
   7  -1  11    6.30    2.72
   7   1  12  138.11    8.77
   7   1  12  137.53    7.62
   7  -1  12  148.81    7.88
   7   1  13   24.07    4.14
   7   1  13   25.12    3.80
   7  -1  13   27.33    3.55
   7   1  14    5.52    2.69
   7   1  14    7.02    2.73
   7  -1  14    5.85    2.54
   7   1  15    7.22    2.78
   7   1  15    7.68    2.70
   7  -1  15    7.90    2.87
   7   1  16    0.36    2.85
   7   1  16   -0.46    2.60
   7  -1  16    0.43    1.89
   7   1  17   12.93    3.10
   7  -1  17   11.94    2.76
   7   1  18   26.77    4.11
   7   1  19    3.92    2.41
  -7  -3  22    1.32    2.27
  -7  -3  22    1.68    1.92
   7  -3 -22    1.40    2.30
   7   3 -22    2.58    2.36
   7  -3 -22    3.00    2.48
   7   3 -22    3.00    2.63
  -7   3  21   31.21    5.72
  -7  -3  21   31.48    4.81
  -7  -3  21   33.47    5.36
   7  -3 -21   37.90    5.89
   7  -3 -21   48.62    6.44
  -7   3  20   45.70    6.09
  -7  -3  20   39.21    4.88
  -7  -3  20   42.08    4.83
   7  -3 -20   53.39    6.59
  -7  -3  20   35.97    5.66
   7  -3 -20   66.90    6.65
  -7   3  19    1.71    2.79
  -7  -3  19    1.54    2.12
  -7  -3  19    1.69    2.02
   7  -3 -19    1.40    2.60
   7  -3 -19    2.64    2.23
  -7   3  18   47.84    7.20
  -7  -3  18   50.84    5.11
  -7  -3  18   52.50    4.56
   7  -3 -18   54.40    5.70
  -7  -3  18   42.82    4.80
   7  -3 -18   63.13    5.94
  -7   3  17   21.19    6.35
  -7  -3  17   21.72    3.24
  -7  -3  17   24.51    3.01
   7  -3 -17   26.80    3.53
   7  -3 -17   26.83    3.52
  -7  -3  17   18.60    4.19
   7  -3 -17   30.15    4.16
  -7  -3  16   33.45    3.73
  -7  -3  16   39.32    3.73
   7  -3 -16   35.22    3.85
   7  -3 -16   33.15    3.67
  -7  -3  16   27.72    3.96
   7  -3 -16   34.64    3.73
  -7  -3  15   71.06    5.37
   7  -3 -15   75.50    4.99
  -7  -3  15   61.82    5.12
   7  -3 -15   75.93    5.26
  -7  -3  14  170.00    8.79
  -7   3  14  138.89    7.84
   7  -3 -14  154.69    7.82
   7  -3 -14  141.67    8.06
   7  -3 -14  162.41    7.88
  -7  -3  14  138.32    8.95
   7  -3 -14  148.14    8.42
  -7  -3  13    5.78    2.23
  -7   3  13    5.24    2.75
  -7  -3  13    5.64    2.00
   7  -3 -13    6.92    2.70
   7  -3 -13    6.09    1.97
   7  -3 -13    6.34    2.15
   7  -3 -13    6.35    2.05
   7  -3 -13    6.61    2.18
  -7  -3  12  101.63    6.13
  -7   3  12   92.05    6.22
  -7  -3  12   91.68    6.56
   7  -3 -12  100.71    6.41
   7  -3 -12   94.38    5.58
   7  -3 -12   93.66    5.78
   7  -3 -12  107.15    6.52
   7  -3 -12   92.39    5.67
  -7  -3  11    5.51    1.99
  -7  -3  11    6.04    2.08
   7  -3 -11    6.73    2.60
   7  -3 -11    7.28    2.29
   7  -3 -11    7.01    1.87
   7  -3 -11    6.76    2.17
   7  -3 -11    6.56    2.06
  -7  -3  10   51.61    4.39
  -7   3  10   48.34    4.54
  -7  -3  10   48.13    5.08
   7  -3 -10   46.17    4.14
   7  -3 -10   52.56    4.23
   7  -3 -10   53.29    4.35
   7  -3 -10   50.39    5.30
   7  -3 -10   48.74    4.69
  -7  -3   9   87.08    5.52
  -7   3   9   89.41    6.32
   7  -3  -9   79.06    5.43
   7  -3  -9   92.14    5.32
   7  -3  -9   92.14    5.23
  -7   3   8  109.56    6.89
   7  -3  -8  118.63    6.15
  -7   3   7  856.00   21.11
   7  -3  -7  960.16   21.25
  -7   3   6  232.94   10.65
   7  -3  -6  249.28    9.95
  -7   3   5  528.11   17.15
  -7  -3   5  421.20   15.10
   7  -3  -5  518.49   14.52
   7   3  -4   69.83    5.46
  -7   3   4   84.23    6.58
   7  -3  -4   66.87    4.22
   7   3  -3  113.98    7.53
  -7   3   3  109.82    7.96
   7  -3  -3  114.87    6.03
   7   3  -2  370.72   12.74
  -7   3   2  356.76   13.72
   7  -3  -2  329.61   10.41
   7   3  -1   84.52    5.97
  -7   3   1   68.13    6.81
   7  -3  -1   93.79    5.97
   7   3   0    1.68    2.30
  -7   3   0    1.46    2.36
   7   3   1  109.74    6.74
   7   3   2  189.63    8.70
   7   3   3  204.30    9.43
   7   3   4    5.67    3.39
   7   3   5    1.04    3.40
   7   3   5    1.99    2.82
   7   3   6    6.10    2.84
   7  -3   6    6.87    2.00
   7   3   6    7.75    3.34
   7   3   6    6.96    2.60
  -7  -3  -6    7.32    2.46
   7   3   6    6.56    2.23
   7   3   7   91.25    7.39
   7   3   7   99.49    6.62
   7   3   7   89.41    7.22
   7   3   7   93.06    6.15
   7   3   8   23.67    4.37
   7   3   8   21.90    3.71
   7   3   8   25.48    4.32
   7   3   8   23.99    3.83
   7   3   9    0.36    3.70
   7   3   9    0.99    2.17
   7   3   9   -0.01    2.21
   7  -3   9    0.13    2.29
   7   3   9   -0.24    2.05
   7   3  10   12.90    4.02
   7   3  10   13.82    3.41
   7   3  10   13.78    3.22
   7  -3  10   12.65    2.94
   7   3  10   13.73    2.87
   7   3  11    6.81    4.16
   7   3  11    7.60    3.27
   7  -3  11    7.22    2.82
   7   3  11    6.40    2.76
   7   3  12   31.33    4.48
   7   3  12   27.82    3.90
   7  -3  12   27.56    3.61
   7   3  12   26.68    3.53
   7   3  13   58.23    5.72
   7   3  13   50.96    5.11
   7  -3  13   44.76    4.23
   7   3  13   50.69    4.48
   7   3  14   31.49    5.05
   7   3  14   27.41    3.86
   7  -3  14   27.29    3.68
   7   3  14   28.77    4.13
   7   3  15   71.00    6.37
   7   3  15   60.71    5.79
   7  -3  15   56.26    4.83
   7   3  15   64.63    5.54
   7   3  16    0.59    3.31
   7   3  16    0.49    2.39
   7  -3  16    0.34    1.96
   7   3  16    0.42    2.00
   7   3  17    2.54    2.97
   7   3  17    1.75    2.94
   7  -3  17    1.35    2.08
   7   3  18   30.10    5.20
   7  -3  18   27.53    3.98
  -7  -5  20    0.31    1.84
   7  -5 -20    0.30    2.39
  -7  -5  19    7.36    2.18
   7  -5 -19    9.47    2.70
  -7  -5  18   34.71    5.97
  -7  -5  18   39.45    4.62
   7  -5 -18   57.21    6.55
  -7  -5  17   16.08    3.27
   7  -5 -17   20.12    3.65
   7  -5 -17   24.65    3.62
  -7  -5  16   73.42    6.50
   7  -5 -16   89.47    7.88
   7  -5 -16   98.88    5.98
  -7  -5  15   38.29    4.83
   7  -5 -15   46.43    5.55
   7  -5 -15   51.88    5.39
  -7  -5  14  544.92   18.20
   7  -5 -14  667.01   19.00
   7  -5 -14  662.15   15.54
  -7  -5  13   15.66    3.00
   7  -5 -13   23.84    3.68
   7  -5 -13   25.66    3.90
  -7  -5  12  270.97   12.66
   7   5 -12  346.49   15.41
   7  -5 -12  307.10   12.87
   7  -5 -12  327.19   12.89
  -7  -5  11   45.79    5.03
   7   5 -11   56.92    7.29
   7  -5 -11   48.13    4.66
   7  -5 -11   53.95    4.62
  -7  -5  10   42.88    4.60
   7   5 -10   64.88    7.88
   7  -5 -10   65.02    5.34
   7  -5 -10   55.91    4.75
  -7  -5   9  630.19   21.51
   7   5  -9  758.94   25.79
  -7   5   9  620.51   23.40
  -7  -5   9  564.29   21.80
   7  -5  -9  714.95   23.74
   7  -5  -9  745.76   23.93
  -7  -5   8  110.40    8.00
   7   5  -8  115.88   12.35
  -7   5   8  102.53    9.32
  -7  -5   8  110.40    7.47
   7  -5  -8   94.34    8.20
   7  -5  -8  106.22    6.98
   7  -5  -8  124.15    9.49
  -7  -5   7   36.72    4.56
   7   5  -7   37.03   11.34
  -7   5   7   36.15    6.22
  -7  -5   7   38.78    4.74
   7  -5  -7   36.24    3.93
   7  -5  -7   42.77    4.91
  -7  -5   6  403.62   15.28
   7   5  -6  464.97   20.37
  -7  -5   6  397.75   16.73
   7  -5  -6  353.39   12.59
   7  -5  -6  416.02   14.71
  -7  -5   5   15.92    2.67
   7  -5  -5   19.70    2.78
  -7  -5   5   16.96    3.12
   7  -5  -5   15.56    2.23
   7  -5  -5   17.99    2.69
  -7  -5   4   82.27    6.25
   7  -5  -4   94.62    5.72
   7   5  -4   98.07   12.84
  -7  -5   4   83.84    6.89
   7  -5  -4   71.28    5.73
   7  -5  -4   92.75    6.43
  -7  -5   3    4.34    2.20
   7  -5  -3    5.32    1.80
   7   5  -3   -8.77    9.09
  -7  -5   3    5.09    2.81
   7  -5  -3    5.49    1.97
   7  -5  -3    5.02    2.54
  -7  -5   2   73.73    5.34
   7  -5  -2   90.00    6.00
   7   5  -2   90.33   12.71
  -7  -5   2   83.59    6.06
   7  -5  -2   86.78    6.01
   7  -5  -2   93.76    6.59
  -7  -5   1    4.05    1.96
   7  -5  -1    7.42    2.39
   7   5  -1   18.53    7.94
  -7  -5   1    5.60    2.35
   7  -5  -1    6.18    2.00
  -7  -5   0   44.08    4.50
   7  -5   0   55.66    4.32
   7   5   0   54.37    7.85
  -7  -5   0   52.41    4.69
   7  -5   0   62.18    6.12
  -7  -5  -1    2.36    1.65
   7   5   1    2.09    6.18
   7   5   1    2.45    2.78
   7  -5   1    1.47    2.14
   7   5   1    1.54    2.58
   7   5   2    8.94    3.01
   7  -5   2   10.17    2.26
   7   5   2   12.98    4.08
   7   5   2   10.10    3.39
  -7  -5  -2   12.01    3.39
   7  -5   2   11.28    2.69
   7   5   2   10.10    3.25
   7   5   3   -0.01    2.49
   7  -5   3   -0.10    2.20
   7   5   3    0.16    2.39
  -7  -5  -3    0.80    2.20
   7  -5   3    0.28    1.99
   7   5   3   -0.71    2.63
   7   5   4    3.09    3.70
   7  -5   4    3.49    2.27
   7   5   4    3.98    2.81
  -7  -5  -4    3.82    3.00
   7  -5   4    4.22    2.29
   7   5   4    3.49    2.11
   7   5   5    5.18    3.77
   7  -5   5    6.50    2.58
   7   5   5    5.32    2.91
  -7  -5  -5    5.89    3.19
   7  -5   5    6.99    2.55
   7   5   5    5.83    3.06
   7   5   6    0.24    2.81
   7  -5   6    0.70    2.14
  -7  -5  -6    1.51    2.39
   7  -5   6    1.17    2.26
   7   5   6    1.50    2.23
   7   5   7    2.38    3.82
   7  -5   7    1.41    2.29
   7   5   7    0.62    2.73
  -7  -5  -7    1.37    3.06
   7  -5   7    1.26    2.45
   7   5   7    1.23    2.91
   7   5   8    0.55    3.71
   7  -5   8    1.16    1.92
   7   5   8    0.56    2.70
  -7  -5  -8   -0.50    2.92
   7  -5   8    0.43    2.27
   7   5   8    1.02    3.09
   7   5   9    3.10    3.15
  -7  -5  -9    3.96    3.00
   7  -5   9    1.92    1.93
   7   5   9    2.49    2.32
   7   5  10   66.60    6.58
  -7  -5 -10   61.99    6.46
   7  -5  10   50.91    5.66
   7   5  11    2.41    3.18
  -7  -5 -11    2.05    2.42
   7  -5  11    2.57    4.04
  -7  -5 -12    3.53    2.49
   7   5  12    3.28    3.09
   7   5  13   12.46    3.18
   7   5  14    1.26    2.43
   7   5  15    0.83    2.38
   7   5  16    3.18    2.15
  -7  -7  16   11.54    2.15
   7  -7 -16   17.80    3.74
  -7  -7  15   16.82    2.54
   7  -7 -15   20.68    4.10
   7  -7 -15   21.96    3.73
  -7  -7  14   47.44    3.83
   7  -7 -14   55.42    5.58
   7  -7 -14   61.53    5.23
  -7  -7  13   14.86    2.57
   7  -7 -13   12.59    4.44
   7  -7 -13   18.07    4.04
   7   7 -12   13.90    4.16
   7  -7 -12   10.73    3.31
   7  -7 -12   14.36    3.10
   7   7 -11   40.12    6.09
   7  -7 -11   34.19    3.50
   7   7 -10   86.62    8.76
   7  -7 -10   82.22    5.75
   7   7  -9   89.88   10.24
   7  -7  -9   82.45    6.06
   7   7  -8   30.32    9.28
   7  -7  -8   20.49    4.23
   7   7  -7  360.53   14.59
   7  -7  -7  343.06   15.26
  -7  -7   6    4.99    2.58
   7  -7  -6    5.23    3.13
   7  -7  -5   14.10    3.40
   7   7  -5   27.26   11.91
  -7  -7   5   14.59    3.61
   7  -7  -5   18.31    3.37
   7  -7  -4    3.64    2.49
   7   7  -4   10.10   11.08
  -7  -7   4    3.16    2.12
   7  -7  -4    3.09    2.45
  -7  -7   3   55.36    5.39
   7  -7  -3   85.31    6.76
   7   7  -3   78.99   13.32
  -7  -7   3   63.35    5.60
   7  -7  -3   81.05    6.06
  -7  -7   2   54.50    6.04
   7  -7  -2   77.61    6.04
   7   7  -2   77.74   12.46
  -7  -7   2   54.31    5.91
   7  -7  -2   69.02    5.11
  -7  -7   1    5.79    2.33
   7  -7  -1    8.37    2.76
   7   7  -1   17.95    6.77
  -7  -7   1    5.76    2.81
   7  -7  -1    6.70    2.54
  -7  -7   0    3.68    2.15
   7  -7   0    6.84    2.87
   7   7   0    2.03    6.83
  -7  -7   0    4.01    2.11
   7  -7   0    5.32    2.09
  -7  -7  -1    1.75    2.08
   7  -7   1    3.01    3.03
   7   7   1    3.99    3.70
  -7  -7  -1    1.62    1.96
   7  -7   1    1.51    2.46
  -7  -7  -2   29.44    3.61
  -7  -7  -2   31.33    3.83
   7  -7   2   38.91    4.62
  -7  -7  -3   10.13    2.43
   7  -7   3   15.81    3.52
  -7  -7  -3   10.59    2.85
   7  -7   3   11.51    2.75
  -7  -7  -4    1.92    2.00
   7  -7   4    4.10    2.32
  -7  -7  -4    1.99    2.63
   7  -7   4    2.88    2.46
  -7  -7  -5    1.08    2.09
   7  -7   5    1.32    2.11
   7  -7   5    0.92    1.78
  -7  -7  -6   23.98    3.39
   7  -7   6   32.26    4.10
  -7  -7  -6   30.60    3.90
   7  -7   6   30.81    4.05
   7   7   6   27.45    4.05
  -7  -7  -7   12.65    2.55
   7  -7   7   14.88    3.03
  -7  -7  -7   15.78    3.15
   7  -7   7   14.24    2.98
   7   7   7   14.95    3.36
  -7  -7  -8   20.61    3.03
   7  -7   8   24.20    3.88
  -7  -7  -8   20.70    3.06
   7  -7   8   22.36    3.49
   7   7   8   23.92    4.14
  -7  -7  -9    1.22    2.05
   7  -7   9    1.16    2.05
  -7  -7  -9    0.82    1.92
   7  -7   9    1.40    2.35
   7   7   9    1.47    2.36
  -7  -7 -10    1.59    2.24
   7  -7  10   -2.41    3.44
   7   7  10    1.51    2.48
  -7  -7 -11    0.18    1.83
  -7  -7 -11    0.15    1.96
   7  -7  11   -2.95    5.08
   7   7  11    0.68    2.45
  -7  -7 -12   10.68    2.39
   7   7  12   12.61    3.09
   7   9  -8    0.30    3.07
   7  -9  -8    0.91    2.52
   7   9  -6   70.55    7.53
   7  -9  -6   66.63    7.59
   7   9  -5    7.17    3.00
   7   9  -4   23.32    4.07
   7  -9  -4   24.07    3.92
   7  -9  -3   13.41    4.17
   7   9  -3   18.16    3.96
   7  -9  -3   15.74    3.33
   7  -9  -2    5.32    3.61
   7   9  -2    5.45    2.70
   7  -9  -2    4.19    2.64
   7  -9  -1   13.30    3.89
   7   9  -1   13.15    3.09
   7  -9  -1   12.75    2.75
   7  -9   0   23.47    4.60
  -7  -9   0   24.28    4.75
   7  -9   0   24.30    3.92
   7  -9   1   32.66    5.36
  -7  -9  -1   34.31    5.40
   7  -9   1   33.44    4.97
   7  -9   2  131.77   11.92
  -7  -9  -2  119.37   11.05
   7  -9   2  122.62   11.06
  -7  -9  -3   72.44    7.77
   7  -9   3   68.74    7.41
   7  -9   4   13.94    5.06
  -8   0  23   -0.31    2.75
   8   0 -23   -0.07    2.15
  -8   0  22   10.85    3.49
   8   0 -22   10.79    2.82
  -8   0  21   -0.34    2.82
   8   0 -21   -0.30    2.21
   8   0 -21   -0.25    2.27
  -8   0  20  145.71    8.42
   8   0 -20  159.27   12.29
   8   0 -20  174.72    7.45
   8   0 -20  186.39    9.15
  -8   0  19   -0.61    3.10
   8   0 -19   -0.21    2.51
   8   0 -19    0.59    2.26
  -8   0  18   29.59    4.17
   8   0 -18   30.32    4.13
   8   0 -18   40.25    4.25
  -8   0  17    0.79    2.73
   8   0 -17    1.28    1.86
   8   0 -17    2.35    2.73
  -8   0  16  225.35   11.52
  -8   0  16  214.35   10.70
   8   0 -16  264.31   12.34
  -8   0  15    4.13    2.85
  -8   0  15    1.48    2.55
   8   0 -15    4.10    2.46
  -8   0  14   59.57    5.17
  -8   0  14   55.17    4.83
   8   0 -14   59.51    4.75
  -8   0  14   44.48    4.99
  -8   0  13    0.37    2.36
  -8   0  13    0.16    1.71
  -8   0  13   -0.07    2.38
  -8   0  13    0.30    2.05
   8   0 -13   -0.42    1.74
  -8   0  12  125.73    8.36
  -8   0  12  100.96    8.83
  -8   0  12  122.55    7.45
   8   0 -12  130.42    6.89
   8   0 -12  132.38    9.35
  -8   0  11    0.33    1.99
  -8   0  11    0.30    1.81
   8   0 -11   -0.24    1.74
  -8   0  10   40.07    4.45
   8   0 -10   40.16    3.90
  -8   0   9    1.89    2.27
  -8   0   8   16.66    3.88
  -8   0   7    0.31    2.43
  -8   0   6 1606.58   30.42
  -8   0   5    0.28    3.61
  -8   0   4   98.23    7.11
  -8   0   2   29.71    4.96
   8   0  -1    5.02    2.66
   8   0   0 1430.49   24.28
   8   0   1    5.55    3.59
   8   0   2  402.02   14.28
   8   0   3    8.97    3.03
   8   0   4  150.49    7.53
   8   0   5    0.37    2.51
   8   0   6  245.41    9.83
   8   0   7    0.34    1.87
   8   0   7    0.50    2.23
   8   0   8  353.32   13.54
   8   0   9    0.15    1.83
   8   0  10  227.06    9.40
   8   0  11   -0.24    2.00
   8   0  12   43.43    3.96
   8   0  13   -0.98    2.63
   8   0  18   37.80    4.54
   8   0  19   -0.18    2.41
  -8  -2  23   10.57    3.12
  -8   2  22   22.29    4.35
  -8  -2  22   22.11    4.11
   8  -2 -22   26.83    5.00
   8   2 -22   29.04    4.02
   8  -2 -22   33.15    4.66
   8   2 -22   29.47    4.44
  -8   2  21    2.24    2.78
  -8  -2  21    3.13    2.67
   8  -2 -21    3.67    2.72
   8  -2 -21    4.22    2.49
   8  -2 -21    4.22    2.73
   8   2 -21    3.99    2.45
  -8   2  20    9.00    3.30
  -8  -2  20    9.07    2.84
   8  -2 -20   11.92    3.00
   8  -2 -20   13.18    3.22
   8   2 -20   10.79    2.73
  -8   2  19   49.19    7.20
  -8  -2  19   49.47    4.68
  -8  -2  19   49.72    5.32
   8  -2 -19   53.57    6.00
  -8  -2  19   40.86    5.21
   8  -2 -19   69.86    6.83
  -8   2  18   38.66    5.79
  -8  -2  18   43.89    4.87
  -8  -2  18   42.25    4.91
   8  -2 -18   48.94    4.94
   8  -2 -18   46.98    4.39
  -8  -2  18   34.43    4.51
   8  -2 -18   52.34    5.11
  -8   2  17   88.09    7.69
  -8  -2  17   90.91    6.81
  -8  -2  17   92.74    7.59
  -8  -2  17   70.23    5.78
   8  -2 -17  102.94    6.03
   8  -2 -17  103.19    5.75
  -8  -2  17   70.32    7.19
   8  -2 -17   99.46    6.80
  -8   2  16  401.08   18.99
  -8  -2  16  455.98   20.33
  -8  -2  16  363.04   16.03
   8  -2 -16  420.69   18.62
   8  -2 -16  468.35   16.39
  -8  -2  16  347.73   16.55
   8  -2 -16  473.10   17.18
  -8   2  15    2.85    2.67
  -8  -2  15    2.72    2.33
   8  -2 -15    5.51    2.29
   8  -2 -15    5.06    2.11
   8  -2 -15    5.06    1.90
  -8   2  14  430.80   15.83
  -8  -2  14  510.38   19.11
   8  -2 -14  435.17   17.53
   8  -2 -14  520.73   17.40
   8  -2 -14  510.07   17.97
  -8   2  13   54.80    4.63
  -8  -2  13   61.48    5.51
   8  -2 -13   57.32    4.51
   8  -2 -13   55.48    4.28
   8  -2 -13   58.11    4.69
   8  -2 -13   58.94    4.84
   8  -2 -13   56.85    5.09
  -8   2  12   26.50    3.96
  -8   2  12   28.02    3.65
  -8  -2  12   28.49    3.80
   8  -2 -12   23.65    2.81
   8  -2 -12   28.68    3.37
   8  -2 -12   25.88    3.47
   8  -2 -12   23.32    3.04
   8  -2 -12   24.53    3.52
  -8  -2  11  890.68   24.10
  -8   2  11  832.66   19.54
  -8   2  11  916.57   25.20
  -8  -2  11  858.40   19.91
   8  -2 -11  759.21   16.78
   8  -2 -11  860.97   19.08
   8  -2 -11  824.56   19.17
  -8  -2  10    7.59    2.24
  -8   2  10    7.28    3.43
  -8   2  10    7.28    2.78
  -8  -2  10    8.27    2.66
   8  -2 -10    8.03    2.82
  -8  -2   9  455.61   15.22
   8  -2  -9  589.39   15.38
  -8  -2   8  317.58   13.18
   8  -2  -8  405.21   13.41
  -8   2   7  635.62   17.39
  -8  -2   7  555.53   17.43
   8  -2  -7  627.41   16.76
  -8   2   6   39.20    4.56
  -8  -2   6   40.95    5.02
   8  -2  -6   51.33    4.59
  -8   2   5 1418.64   30.87
  -8  -2   5 1315.05   29.43
   8  -2  -5 1445.87   26.81
   8   2  -4  120.47    7.81
  -8   2   4  118.29    7.51
   8  -2  -4   99.64    5.76
   8   2  -3  179.37    8.58
  -8   2   3  163.63    9.04
   8   2  -2   56.17    4.97
  -8   2   2   55.72    5.70
   8   2  -1  260.64   10.08
  -8   2   1  256.84   11.49
   8   2   0  195.63   10.56
  -8   2   0  204.22   11.39
   8   2   1 1500.79   27.42
  -8   2  -1 1769.51   36.41
  -8   2  -2  828.28   25.05
   8   2   3 1544.13   28.08
   8   2   4 3825.17   55.51
   8   2   5   26.21    4.14
   8   2   6  211.47   11.19
   8   2   6  208.02    9.26
   8   2   6  204.24    9.99
   8   2   6  183.84    8.23
   8   2   7   12.31    3.21
   8   2   7   14.43    3.43
   8   2   7   11.11    3.49
   8  -2   7    9.78    2.35
   8   2   7   12.58    2.90
   8   2   8   29.83    4.56
   8   2   8   32.96    4.11
   8   2   8   34.16    4.45
   8  -2   8   36.14    4.14
   8   2   8   25.89    3.70
   8   2   9   24.26    4.28
   8   2   9   20.52    3.68
   8   2   9   25.25    4.11
   8  -2   9   21.96    3.34
   8   2   9   21.90    3.39
   8   2  10  286.95   13.59
   8   2  10  262.05   12.53
   8   2  10  306.93   13.63
   8  -2  10  286.97   11.57
   8   2  10  267.87   11.58
   8   2  11   37.85    5.14
   8   2  11   37.03    4.22
   8  -2  11   40.59    4.16
   8   2  11   35.40    3.92
   8   2  12  119.30    8.77
   8   2  12  112.97    7.93
   8  -2  12   92.74    7.63
   8   2  12  106.60    7.97
   8   2  13    7.99    3.64
   8   2  13    8.49    2.85
   8  -2  13    8.21    2.92
   8   2  13    6.35    2.12
   8   2  14   19.58    3.73
   8   2  14   19.30    3.83
   8  -2  14   19.49    3.49
   8   2  15   41.22    5.42
   8   2  15   37.21    4.02
   8  -2  15   38.59    4.11
   8   2  16   23.37    4.66
   8   2  16   26.26    4.25
   8  -2  16   22.36    3.46
   8   2  17    4.88    2.85
   8   2  17    5.86    2.61
   8  -2  17    5.57    2.55
   8   2  18   15.46    3.61
   8  -2  18   19.24    3.88
  -8  -4  21    8.45    2.58
  -8  -4  21    8.76    2.30
   8  -4 -21   10.76    3.09
   8  -4 -21   13.45    3.36
  -8  -4  20    1.13    2.05
  -8  -4  20    1.69    1.84
   8  -4 -20    1.97    2.61
   8  -4 -20    2.57    2.52
  -8  -4  19    9.06    2.70
  -8  -4  19   10.41    2.43
   8  -4 -19   12.77    3.19
   8  -4 -19   15.56    3.19
  -8  -4  18    0.48    2.39
  -8  -4  18    0.42    1.80
   8  -4 -18    0.16    2.24
  -8  -4  17   24.74    3.37
  -8  -4  17   31.15    3.36
   8  -4 -17   29.66    4.14
   8  -4 -17   35.97    3.92
  -8  -4  16    2.08    2.15
   8  -4 -16    3.37    3.06
   8  -4 -16    3.76    2.46
  -8  -4  15   12.65    2.75
   8  -4 -15   14.25    3.31
   8  -4 -15   12.14    2.52
  -8  -4  14   33.39    3.82
   8  -4 -14   33.94    4.02
   8  -4 -14   34.62    3.44
  -8  -4  13    4.45    2.52
  -8  -4  13    3.79    2.36
   8  -4 -13    8.02    2.87
   8  -4 -13    6.00    2.27
  -8  -4  12    3.62    2.63
  -8  -4  12    3.65    1.99
   8  -4 -12    3.83    2.21
   8  -4 -12    4.37    1.93
   8  -4 -12    4.42    1.83
  -8  -4  11  153.30    8.23
   8   4 -11  162.44    8.48
  -8   4  11  141.66    8.40
  -8  -4  11  141.82    9.31
   8  -4 -11  164.45    8.98
   8  -4 -11  140.44    7.25
   8  -4 -11  158.00    7.85
   8  -4 -11  154.62    7.74
  -8  -4  10   48.36    4.28
   8   4 -10   51.12    5.21
  -8   4  10   43.46    5.14
  -8  -4  10   51.09    5.14
   8  -4 -10   54.85    5.83
   8  -4 -10   52.53    4.88
   8  -4 -10   60.29    5.12
   8  -4 -10   59.18    5.66
  -8  -4   9   61.16    4.75
   8   4  -9   68.15    6.22
  -8   4   9   62.85    6.59
  -8  -4   9   60.19    5.29
   8  -4  -9   60.35    6.27
   8  -4  -9   62.54    4.90
   8  -4  -9   64.20    4.69
   8  -4  -9   67.90    5.94
  -8  -4   8   67.67    5.33
   8   4  -8   59.21    6.13
  -8   4   8   62.34    5.64
  -8  -4   8   68.28    5.98
   8  -4  -8   54.62    6.70
   8  -4  -8   61.62    4.44
   8  -4  -8   70.52    4.90
   8  -4  -8   68.73    5.27
  -8  -4   7   24.66    4.19
   8   4  -7   24.60    6.01
  -8   4   7   26.26    4.16
  -8  -4   7   27.35    3.93
   8  -4  -7   24.11    2.82
   8  -4  -7   23.49    3.10
  -8  -4   6    3.39    2.55
   8  -4  -6    2.70    1.48
   8   4  -6    3.12    5.39
  -8   4   6    3.39    3.07
  -8  -4   6    3.43    2.57
   8  -4  -6    3.33    1.59
   8  -4  -6    3.85    2.20
   8  -4  -6    2.73    1.77
   8  -4  -6    2.15    2.21
  -8  -4   5   36.52    3.79
   8  -4  -5   39.20    3.76
   8   4  -5   42.69    5.86
  -8   4   5   39.69    4.77
  -8  -4   5   38.65    4.48
   8  -4  -5   31.45    2.85
   8  -4  -5   36.30    3.58
   8  -4  -5   35.96    3.70
  -8  -4   4   16.51    2.58
   8  -4  -4   18.92    2.84
  -8   4   4   14.57    3.28
  -8  -4   4   17.53    3.31
   8  -4  -4   14.79    2.33
   8  -4  -4   17.95    2.98
   8  -4  -4   15.65    2.94
  -8  -4   3    4.56    2.32
   8  -4  -3    7.59    2.15
   8   4  -3    2.24    4.56
   8   4  -3    6.41    2.72
  -8  -4   3    4.78    2.17
   8  -4  -3    4.17    2.41
   8  -4  -3    5.72    1.63
   8  -4  -3    6.01    2.15
  -8  -4   2  131.23    6.86
   8  -4  -2  163.04    7.84
   8   4  -2  156.50    9.01
   8   4  -2  141.02    8.58
   8  -4  -2  124.91    6.81
   8  -4  -2  142.55    7.13
   8  -4  -2  137.50    6.98
  -8  -4   1   57.32    4.29
   8  -4  -1   77.03    5.26
   8   4  -1   73.79    6.79
   8   4  -1   71.74    6.40
  -8  -4   1   68.77    5.86
   8  -4  -1   48.12    5.76
   8  -4  -1   62.85    5.23
   8   4  -1   56.06    6.10
  -8  -4   0    1.89    2.08
   8   4   0    2.82    3.15
   8   4   0    2.49    2.30
  -8  -4   0    2.21    2.55
   8  -4   0    2.14    1.86
   8   4   0    2.08    2.17
   8  -4   1  207.59    8.88
   8   4   1  155.92    8.40
   8   4   1  170.44    9.31
  -8  -4  -1  189.05    9.49
   8  -4   1  159.99    8.82
   8   4   1  150.91    9.26
   8  -4   2  198.34   10.02
   8   4   2  154.84    8.14
   8   4   2  198.30   10.27
   8   4   2  140.25    8.83
  -8  -4  -2  206.09   11.09
   8  -4   2  172.51   10.51
   8   4   2  173.47   10.04
   8  -4   3   28.02    3.25
   8   4   3   24.56    4.10
   8   4   3   18.81    3.70
  -8  -4  -3   29.55    4.28
   8  -4   3   24.36    3.90
   8   4   3   26.01    3.88
   8   4   4   15.10    3.89
   8  -4   4   19.90    2.84
   8   4   4   17.49    3.25
   8   4   4   13.78    3.21
  -8  -4  -4   19.03    3.55
   8   4   4   15.07    2.85
   8   4   5  195.85   10.45
   8  -4   5  196.80    9.03
   8   4   5  213.96   10.10
   8   4   5  171.59    9.31
  -8  -4  -5  230.92   13.67
   8   4   5  191.85    9.35
   8   4   6  441.58   18.29
   8  -4   6  426.05   16.44
   8   4   6  403.11   16.99
   8   4   6  406.44   17.18
  -8  -4  -6  475.61   20.01
   8   4   6  443.05   16.61
   8   4   7  106.68    7.85
   8  -4   7   93.77    5.89
   8   4   7  101.26    7.47
  -8  -4  -7   98.99    8.25
   8   4   8  152.00    9.78
   8   4   8  145.23    9.40
  -8  -4  -8  146.48   12.41
   8   4   9  253.22   12.78
   8   4   9  248.39   13.01
   8   4   9  279.76   12.22
   8   4  10   37.95    4.91
   8   4  10   35.59    4.80
   8   4  10   37.24    4.35
   8   4  11   63.53    6.12
   8   4  11   55.28    5.49
   8   4  11   66.01    5.26
   8   4  12   32.23    4.60
   8   4  12   27.56    4.11
   8   4  12   31.77    4.10
   8   4  13  133.73    8.46
   8   4  13  122.56    8.76
   8   4  13  141.14    9.23
   8   4  14    5.46    3.65
   8   4  14    5.36    2.76
   8   4  14    6.12    2.72
   8   4  15   34.94    5.21
   8   4  15   36.94    4.93
   8   4  16   44.05    5.64
   8   4  16   49.01    6.24
  -8  -6  18   12.65    2.38
   8  -6 -18   16.47    3.68
   8  -6 -18   17.07    3.74
  -8  -6  17    3.96    1.86
   8  -6 -17    5.27    2.67
   8  -6 -17    5.76    2.38
  -8  -6  16    6.79    2.15
   8  -6 -16    8.02    2.88
   8  -6 -16    8.09    2.57
  -8  -6  15   18.32    2.98
   8  -6 -15   19.09    3.58
   8  -6 -15   18.69    3.21
  -8  -6  14    7.69    2.26
   8  -6 -14   14.15    3.40
   8  -6 -14   10.65    2.27
  -8  -6  13   29.01    4.53
   8  -6 -13   41.51    4.54
   8  -6 -13   38.50    3.64
  -8  -6  12   22.64    3.93
   8   6 -12   31.39    4.19
   8  -6 -12   29.28    3.93
   8  -6 -12   29.35    3.40
  -8  -6  11   43.87    5.60
   8   6 -11   58.22    6.44
   8  -6 -11   42.72    5.23
   8  -6 -11   54.43    4.74
  -8  -6  10   26.43    3.36
   8   6 -10   35.56    5.52
   8  -6 -10   36.39    4.56
  -8  -6   9   52.37    4.87
   8   6  -9   87.92    8.25
  -8  -6   9   56.55    7.20
   8  -6  -9   75.26    5.21
  -8  -6   8   14.52    3.36
   8   6  -8   23.53    8.88
  -8  -6   8   15.29    3.40
   8  -6  -8   19.20    3.19
  -8  -6   7  138.46    8.18
   8   6  -7  187.10   11.91
  -8  -6   7  152.76   10.17
   8  -6  -7  181.71    9.10
  -8  -6   6   13.63    3.03
   8  -6  -6   17.34    3.10
  -8  -6   6   13.93    2.97
   8  -6  -6   15.03    2.95
  -8  -6   5   86.87    6.70
   8  -6  -5  104.78    7.05
   8   6  -5  116.59    9.56
  -8  -6   5   95.56    8.03
   8  -6  -5  106.93    6.37
  -8  -6   4  239.20   10.59
   8  -6  -4  283.92   12.17
   8   6  -4  331.52   14.16
  -8  -6   4  274.12   11.85
   8  -6  -4  268.29    9.89
  -8  -6   3   30.59    4.39
   8  -6  -3   37.52    4.10
   8   6  -3   39.46    7.60
  -8  -6   3   29.04    4.08
   8  -6  -3   33.45    4.04
  -8  -6   2    4.44    2.58
   8  -6  -2    6.76    2.26
   8   6  -2    9.40    6.12
  -8  -6   2    6.76    2.94
   8  -6  -2    7.13    2.27
  -8  -6   1  218.58    9.84
   8  -6  -1  267.92   10.39
   8   6  -1  279.79   12.46
  -8  -6   1  258.64   10.70
   8  -6  -1  268.55   10.70
  -8  -6   0  137.94    7.50
   8  -6   0  181.15   10.11
   8   6   0  152.29    9.09
  -8  -6   0  153.58    8.63
   8  -6   0  160.56    8.76
  -8  -6  -1   41.45    3.98
   8   6   1   45.08    5.12
   8  -6   1   50.30    5.51
  -8  -6  -2    3.36    2.30
   8  -6   2    5.34    2.35
   8   6   2    3.27    2.69
   8  -6   2    3.73    2.55
   8   6   2    1.60    1.97
  -8  -6  -3   24.36    2.91
   8  -6   3   35.59    4.05
  -8  -6  -3   27.63    3.71
   8  -6   3   27.68    3.64
   8   6   3   25.37    4.22
  -8  -6  -4   24.68    3.10
   8  -6   4   33.08    4.25
  -8  -6  -4   28.65    3.76
   8  -6   4   30.08    4.54
   8   6   4   27.17    3.86
  -8  -6  -5   11.46    2.64
   8  -6   5   16.85    3.18
  -8  -6  -5   13.51    3.50
   8  -6   5   11.95    2.95
   8   6   5   14.39    3.24
   8   6   6   84.58    6.25
   8  -6   6  110.98    6.21
  -8  -6  -6  104.32    7.72
   8  -6   6   88.74    7.39
   8   6   6   95.44    6.89
   8   6   7    2.73    2.67
   8  -6   7    5.40    2.21
  -8  -6  -7    4.69    2.85
   8  -6   7    3.90    2.18
   8   6   7    3.44    2.82
   8   6   8    8.12    3.71
   8  -6   8    8.80    2.51
  -8  -6  -8    8.88    2.58
   8  -6   8    7.91    2.64
   8   6   8    9.58    3.13
   8   6   9   60.89    5.70
  -8  -6  -9   61.50    5.54
   8   6   9   70.11    5.54
   8   6  10   12.53    3.85
  -8  -6 -10   13.61    3.16
   8   6  10   12.37    3.00
   8   6  11    7.87    3.19
  -8  -6 -11    9.09    2.64
   8   6  11    9.15    3.03
   8   6  12  141.79    7.91
  -8  -6 -13    8.73    2.36
  -8  -6 -14   23.58    3.77
   8   6  14   24.84    3.89
   8  -8 -12    2.00    2.23
   8   8 -11    0.22    2.42
   8  -8 -11    0.07    2.06
   8   8 -10    2.39    2.52
   8  -8 -10    2.49    2.21
   8   8  -9   30.24    4.13
   8  -8  -9   31.55    4.10
   8   8  -8   33.69    5.06
   8  -8  -8   34.88    5.09
   8   8  -6   19.27    3.93
   8  -8  -6   21.66    3.52
   8   8  -5   -0.31    3.93
  -8  -8   5    0.49    2.14
   8  -8  -5    0.77    2.03
   8  -8  -4    7.04    2.43
   8   8  -4   10.78    3.56
  -8  -8   4    6.30    2.51
   8  -8  -4    6.96    2.51
   8  -8  -3   24.69    4.62
   8   8  -3   28.92    4.54
  -8  -8   3   19.85    3.73
   8  -8  -3   26.84    3.61
   8  -8  -2   13.57    3.09
   8   8  -2   14.86    3.56
  -8  -8   2   11.19    3.03
   8  -8  -2   13.67    3.12
   8  -8  -1   16.48    3.01
   8   8  -1   18.93    3.49
  -8  -8   1   14.92    3.01
   8  -8  -1   18.81    3.28
   8  -8   0   10.60    3.07
   8   8   0    8.57    2.61
  -8  -8   0    6.37    2.33
   8  -8   0    7.45    2.23
   8  -8   1   43.16    6.41
  -8  -8  -1   34.42    4.77
   8  -8   1   40.04    5.21
  -8  -8  -2    2.54    2.60
   8  -8   2    2.02    1.97
   8  -8   3    0.34    2.52
  -8  -8  -3    0.21    2.38
   8  -8   3    0.42    1.92
   8  -8   4    7.30    2.58
  -8  -8  -4    6.44    2.54
   8  -8   4    6.38    2.43
   8  -8   5    7.04    2.69
   8  -8   5    5.76    2.27
   8  -8   6   13.24    3.10
   8  -8   6   13.41    3.49
   8  -8   7   11.24    3.24
  -8  -8  -7   12.74    2.84
  -8  -8  -8    3.19    2.52
  -9  -1  23   33.66    5.51
   9   1 -23   44.50    6.31
  -9   1  22    0.49    2.75
   9  -1 -22   -0.22    2.33
   9   1 -22    0.37    2.33
   9  -1 -22    0.15    2.17
  -9   1  21   27.76    5.39
  -9  -1  21   32.17    5.11
   9  -1 -21   30.88    6.38
   9  -1 -21   36.70    6.35
   9   1 -21   35.71    5.00
  -9   1  20  122.07    9.50
  -9  -1  20  137.19    8.15
   9  -1 -20  162.12   10.63
   9   1 -20  129.41   12.87
   9  -1 -20  150.49    8.70
   9  -1 -20  151.95    9.84
   9   1 -20  144.51   10.38
  -9   1  19   33.36    5.98
  -9  -1  19   36.61    4.05
   9  -1 -19   37.21    3.89
   9   1 -19   31.52    5.97
   9  -1 -19   40.86    4.32
   9  -1 -19   45.31    5.45
   9   1 -19   35.47    4.78
  -9   1  18   12.35    3.33
  -9  -1  18   12.81    3.52
   9  -1 -18   13.07    3.33
   9  -1 -18   16.75    3.43
   9  -1 -18   15.80    3.73
   9   1 -18   12.10    3.55
  -9   1  17   28.36    4.60
  -9  -1  17   31.74    4.14
  -9  -1  17   27.72    3.82
   9  -1 -17   30.41    3.85
   9  -1 -17   32.84    3.59
   9  -1 -17   32.35    4.29
  -9   1  16   94.18    8.52
  -9  -1  16  116.76    7.96
  -9  -1  16   96.55    6.93
   9  -1 -16  103.75    6.24
   9  -1 -16  125.65    7.29
   9  -1 -16  117.16    8.73
  -9   1  15  112.27    8.20
  -9  -1  15  122.43    8.17
  -9   1  15  109.71    7.01
  -9  -1  15  105.06    7.41
   9  -1 -15  118.88    8.15
  -9   1  14  149.26   11.21
  -9  -1  14  172.92    9.80
  -9   1  14  128.72   10.13
  -9   1  14  153.91    8.49
  -9  -1  14  154.16    8.91
   9  -1 -14  141.94    9.37
  -9   1  13   60.35    6.71
  -9  -1  13   68.27    5.69
  -9   1  13   51.92    4.84
  -9  -1  13   62.24    4.87
   9  -1 -13   54.86    5.95
  -9  -1  12    7.50    2.85
  -9   1  12    6.00    2.41
  -9   1  12    6.93    3.24
  -9  -1  12    6.76    2.42
   9  -1 -12    6.22    2.32
  -9  -1  11    3.62    2.00
  -9   1  11    2.95    2.95
  -9  -1  11    3.46    2.72
  -9   1  11    4.11    3.03
  -9  -1  11    3.88    2.14
   9  -1 -11    3.43    2.84
  -9  -1  10   28.14    4.25
  -9   1  10   27.41    3.80
  -9  -1  10   27.79    4.16
  -9   1  10   26.31    3.56
  -9  -1  10   28.31    3.52
   9  -1 -10   27.39    3.65
  -9   1   9   23.34    4.05
  -9  -1   9   22.23    3.36
  -9   1   8  154.72    7.78
  -9  -1   8  147.28    8.73
  -9  -1   7   23.98    4.28
  -9  -1   6  473.55   16.35
  -9   1   5    2.11    2.61
  -9  -1   5    1.71    2.57
  -9   1   4   14.37    3.41
  -9  -1   4   13.27    3.65
  -9   1   3    0.40    2.61
  -9   1   2   33.30    4.86
  -9   1   1  329.29   13.04
   9   1   0  986.29   21.77
  -9   1   0  999.49   24.22
   9   1   1   54.22    4.94
  -9   1  -1   59.33    5.89
   9   1   2   21.25    3.71
  -9   1  -2   22.95    4.56
   9  -1   3    6.25    2.63
   9   1   3   10.13    3.10
   9  -1   4   17.01    2.69
   9   1   4   19.64    3.73
   9   1   5    2.08    2.81
   9   1   5    1.81    1.97
   9   1   5    1.43    2.18
   9   1   6   53.43    5.45
   9  -1   6   49.56    4.56
   9   1   6   44.90    4.29
   9   1   7   10.42    3.00
   9   1   7    7.54    2.76
   9  -1   7    8.36    2.70
   9   1   7    8.27    2.41
   9   1   8   12.29    2.87
   9   1   8   10.10    2.66
   9  -1   8   11.30    2.66
   9   1   8    9.37    2.27
   9   1   9    1.92    2.94
   9  -1   9    1.08    2.29
   9   1   9    1.80    2.14
   9   1  10   40.65    4.74
   9  -1  10   50.15    4.84
   9  -1  11  100.17    6.50
   9  -1  12   65.10    5.02
   9  -1  13  118.00    7.11
   9   1  14    2.98    2.95
   9  -1  14    1.78    2.45
   9   1  15   20.27    3.59
   9  -1  15   19.35    3.44
   9   1  16   37.68    4.88
   9  -1  16   37.58    4.59
   9   1  17   37.43    4.05
   9  -1  17   35.47    4.14
   9   1  18   15.98    3.86
   9  -1  18   17.18    3.52
  -9  -3  22    2.92    2.54
   9   3 -22    3.93    2.88
  -9  -3  21    4.42    2.48
   9  -3 -21    6.15    2.72
   9  -3 -21    7.47    2.81
  -9  -3  20   31.46    4.54
  -9  -3  20   29.52    4.37
   9  -3 -20   36.91    6.27
   9  -3 -20   48.03    7.77
  -9  -3  19   85.16    6.58
  -9  -3  19   87.08    6.67
   9  -3 -19  108.32    7.41
   9  -3 -19  112.50    9.31
  -9  -3  18    8.43    2.81
  -9  -3  18    8.58    2.23
   9  -3 -18   10.01    2.94
  -9  -3  17   50.90    4.99
  -9  -3  17   58.25    6.53
   9  -3 -17   56.33    5.70
   9  -3 -17   57.21    5.40
  -9  -3  16  277.73   11.45
   9  -3 -16  302.79   10.27
   9  -3 -16  288.41    9.87
   9  -3 -16  279.82   10.65
  -9  -3  15   50.35    4.44
  -9  -3  15   41.91    4.83
   9  -3 -15   50.90    4.60
   9  -3 -15   51.52    5.02
   9  -3 -15   52.84    4.66
   9  -3 -15   56.08    4.65
  -9  -3  14  145.32    7.62
  -9  -3  14  123.07    7.25
   9  -3 -14  150.42    8.45
   9  -3 -14  144.64    7.71
   9  -3 -14  133.64    7.16
   9  -3 -14  140.82    7.75
  -9  -3  13    2.14    2.57
  -9  -3  13    1.51    2.63
   9  -3 -13    2.30    2.48
   9  -3 -13    1.87    1.93
   9  -3 -13    2.14    2.11
   9  -3 -13    2.11    1.66
  -9  -3  12    2.26    1.97
  -9  -3  12    2.02    2.52
   9  -3 -12    1.77    2.26
   9  -3 -12    0.97    1.89
   9  -3 -12    1.65    2.05
   9  -3 -12    1.26    1.94
   9  -3 -12    1.62    1.93
  -9   3  11   11.80    2.90
  -9  -3  11   11.14    2.69
   9  -3 -11   11.14    2.78
   9  -3 -11   11.68    2.29
   9  -3 -11   13.57    2.79
   9  -3 -11   10.42    2.54
   9  -3 -11   11.57    2.24
   9   3 -10   12.26    2.41
  -9   3  10   12.34    3.46
  -9  -3  10   12.06    3.27
   9  -3 -10   11.11    2.72
   9  -3 -10   14.74    2.90
   9  -3 -10   15.22    2.94
   9  -3 -10   10.75    2.76
   9  -3 -10   11.45    2.43
   9  -3 -10   13.63    3.12
   9   3  -9    8.85    2.43
  -9   3   9    8.70    3.01
  -9  -3   9    7.91    2.73
   9  -3  -9    7.41    2.26
   9  -3  -9    7.88    2.05
   9  -3  -9    8.23    2.18
   9  -3  -9    7.79    2.63
   9   3  -8   45.92    4.93
  -9   3   8   45.05    5.75
  -9  -3   8   51.12    4.60
   9  -3  -8   39.72    4.84
   9  -3  -8   47.36    4.11
   9  -3  -8   53.66    4.54
   9  -3  -8   45.05    4.66
  -9  -3   7    9.67    2.41
   9   3  -7    7.42    2.26
  -9   3   7    8.54    2.94
  -9  -3   7   10.11    2.60
   9  -3  -7    8.83    2.23
   9  -3  -7    8.63    2.51
  -9  -3   6   10.76    2.75
   9   3  -6   11.17    2.97
  -9   3   6   11.05    3.49
  -9  -3   6    9.13    3.07
  -9  -3   6   11.77    2.70
   9  -3  -6   10.47    2.63
   9  -3  -6    7.93    2.41
  -9  -3   5  257.81   12.99
   9   3  -5  244.12   10.16
  -9   3   5  256.77   11.95
  -9  -3   5  205.48   10.29
   9  -3  -5  227.21    9.41
   9  -3  -5  253.68   10.14
  -9  -3   4    3.24    1.83
   9   3  -4    3.49    2.63
  -9   3   4    2.67    2.39
  -9  -3   4    3.37    2.60
   9  -3  -4    3.93    2.46
   9   3  -3    7.39    2.72
   9   3  -3    6.27    3.25
  -9   3   3    5.66    3.25
   9   3  -2    6.95    2.94
  -9   3   2    6.25    2.98
  -9  -3   1   19.00    2.97
   9   3  -1   22.70    3.83
  -9   3   1   23.52    3.98
   9  -3  -1   23.35    3.10
  -9  -3   0  372.26   12.13
   9  -3   0  481.33   13.63
   9   3   0  415.33   15.08
   9  -3   0  440.28   16.39
   9   3   0  374.13   14.24
   9   3   1   37.86    4.72
   9  -3   1   39.45    3.64
   9   3   1   37.58    3.43
   9   3   1   44.91    4.65
  -9  -3  -1   32.96    4.13
   9  -3   1   37.18    5.48
   9   3   1   38.23    4.19
   9   3   2    4.37    2.60
   9  -3   2    5.17    1.77
   9   3   2    4.91    1.72
   9   3   2    6.70    2.45
   9   3   2    6.12    3.61
  -9  -3  -2    5.46    2.41
   9   3   2    5.11    2.06
   9   3   3   17.40    3.77
   9  -3   3   21.39    2.90
   9   3   3   17.56    3.09
   9   3   3   17.12    3.53
  -9  -3  -3   17.39    3.21
   9   3   3   16.29    2.72
   9   3   4  102.18    7.57
   9  -3   4  101.05    5.58
   9   3   4  109.65    7.90
  -9  -3  -4   84.15    7.11
   9   3   5    9.99    3.83
   9  -3   5    8.86    1.94
   9   3   5   10.20    3.15
   9   3   6   20.13    3.80
   9  -3   6   19.03    2.66
   9   3   6   21.28    3.33
   9   3   6   24.22    4.50
   9   3   6   20.90    3.12
   9   3   7    0.82    2.60
   9   3   7    0.39    2.52
   9   3   7    0.61    3.46
   9   3   7    0.82    2.02
   9   3   8   12.83    3.41
   9   3   8   12.75    3.40
   9   3   8   13.75    2.84
   9   3   9   52.07    5.70
   9   3   9   57.53    5.82
   9   3   9   50.78    4.59
   9   3  10    0.53    3.40
   9   3  10    1.07    3.46
   9   3  10    1.14    2.60
   9   3  11    8.70    3.52
   9   3  11    7.99    3.56
   9  -3  11    5.88    2.05
   9   3  11    8.45    2.49
   9   3  12   25.18    4.10
   9   3  12   24.78    4.29
   9  -3  12   20.92    3.19
   9   3  12   24.41    3.49
   9   3  13    6.83    3.24
   9   3  13    8.39    3.52
   9  -3  13    6.37    2.45
   9   3  13    8.69    2.78
   9   3  14   16.39    3.59
   9   3  14   17.09    3.77
   9  -3  14   15.65    2.98
   9   3  14   15.99    3.06
   9   3  15   55.17    7.68
   9   3  15   54.10    7.29
   9  -3  15   50.35    6.03
   9   3  15   57.21    8.14
   9   3  16   29.04    4.35
   9   3  16   30.41    4.59
   9  -3  16   31.58    4.53
  -9  -5  19    0.45    1.90
  -9  -5  19    0.48    1.68
   9  -5 -19    0.48    2.51
   9  -5 -19    1.02    2.29
  -9  -5  18    1.34    2.06
  -9  -5  18    1.90    1.78
   9  -5 -18    2.17    2.64
   9  -5 -18    2.36    2.42
  -9  -5  17    3.64    2.36
  -9  -5  17    3.44    2.06
   9  -5 -17    3.86    2.60
   9  -5 -17    5.06    2.15
  -9  -5  16   50.72    5.23
  -9  -5  16   66.08    5.18
   9  -5 -16   60.53    6.77
   9  -5 -16   65.18    5.95
  -9  -5  15    2.97    2.58
   9  -5 -15    3.39    2.81
   9  -5 -15    3.59    2.23
  -9  -5  14   16.33    3.40
   9  -5 -14   19.35    3.65
   9  -5 -14   17.65    2.55
  -9  -5  13   -0.24    2.32
   9  -5 -13   -0.12    1.86
  -9  -5  12   22.51    2.97
   9   5 -12   27.97    3.49
  -9  -5  12   18.02    2.87
   9  -5 -12   24.22    4.16
   9  -5 -12   25.57    2.88
  -9  -5  11    6.50    2.48
   9   5 -11    7.07    2.70
  -9  -5  11    4.72    2.55
   9  -5 -11    7.17    2.78
   9  -5 -11    6.38    2.00
  -9  -5  10   45.25    4.39
   9   5 -10   45.28    4.59
  -9  -5  10   37.83    4.48
   9  -5 -10   39.86    5.36
   9  -5 -10   44.51    5.05
  -9  -5   9   41.38    4.19
   9   5  -9   55.25    5.42
  -9  -5   9   41.22    5.03
   9  -5  -9   42.24    4.74
  -9  -5   8  141.72    8.05
   9   5  -8  153.46    8.63
  -9  -5   8  134.00    8.37
   9  -5  -8  147.22    8.55
  -9  -5   7    7.11    2.78
   9   5  -7   11.86    4.26
  -9  -5   7    6.89    2.64
   9  -5  -7    8.42    2.29
  -9  -5   6    2.05    1.99
   9  -5  -6    1.96    1.59
  -9  -5   6    2.88    2.41
   9  -5  -6    1.66    1.47
   9  -5  -6    2.27    1.86
  -9  -5   5   37.73    4.23
   9  -5  -5   38.31    4.22
  -9  -5   5   41.78    5.11
   9  -5  -5   31.54    3.64
   9  -5  -5   38.42    4.34
  -9  -5   4   30.73    3.70
   9  -5  -4   30.48    3.67
   9   5  -4   33.82    5.18
  -9  -5   4   30.79    3.93
   9  -5  -4   29.07    4.17
  -9  -5   3  188.97    9.56
   9  -5  -3  191.23    9.13
   9   5  -3  235.33   11.39
  -9  -5   3  192.88   10.41
   9  -5  -3  186.88   10.73
  -9  -5   2   23.24    3.53
   9  -5  -2   31.08    3.53
   9   5  -2   33.47    5.33
   9  -5  -2   27.32    4.65
  -9  -5   1   10.73    2.45
   9  -5  -1   13.82    2.57
   9   5  -1   13.20    3.67
  -9  -5   0  111.53    6.87
   9   5   0  122.73    8.20
  -9  -5   0  125.07    8.61
   9   5   0  114.81   10.38
  -9  -5  -1    1.63    2.27
   9  -5   1    2.91    2.36
   9   5   1    1.08    2.38
   9   5   1    0.92    2.75
  -9  -5  -1    2.63    3.03
   9  -5   1    2.45    1.77
   9   5   1    2.02    2.63
  -9  -5  -2   -0.01    1.68
   9  -5   2    1.34    1.75
   9   5   2    0.74    1.97
  -9  -5  -2    0.55    2.21
   9   5   2    0.56    2.26
  -9  -5  -3   22.95    2.88
   9  -5   3   28.37    3.24
  -9  -5  -3   31.22    4.53
   9   5   3   28.15    3.83
   9  -5   4   11.55    2.32
  -9  -5  -4   11.61    3.43
   9   5   4   12.00    2.79
   9  -5   5  179.84    8.63
  -9  -5  -5  170.73   10.51
   9   5   5  157.13    8.82
   9  -5   6   61.81    4.54
  -9  -5  -6   57.09    5.83
   9   5   6   59.21    5.12
   9  -5   7  144.43    6.98
  -9  -5  -7  147.70   10.66
   9   5   7  155.82    7.66
   9  -5   8   43.95    4.07
  -9  -5  -8   43.47    5.79
   9   5   8   50.02    4.80
   9   5   9   16.73    3.64
   9   5   9   20.30    3.76
   9   5  10   31.08    4.47
   9   5  11   41.90    5.43
   9   5  11   43.58    4.35
   9   5  12    8.36    2.98
   9   5  12   10.05    2.76
   9   5  13    3.18    3.01
   9   5  13    3.82    2.51
   9   5  14   19.02    3.62
  -9  -7  15    0.37    1.69
   9  -7 -15    0.24    2.21
   9  -7 -14    0.39    2.00
  -9  -7  13   -0.34    1.71
   9  -7 -13    0.12    2.20
   9   7 -12   40.98    5.81
   9  -7 -12   35.10    5.12
   9   7 -11    3.47    2.69
   9  -7 -11    2.17    2.21
  -9  -7  10    0.21    1.66
   9   7 -10    1.19    2.46
   9  -7 -10    1.20    2.21
  -9  -7   9    4.08    2.05
   9   7  -9    8.17    3.37
   9  -7  -9    6.86    2.57
  -9  -7   8    0.45    1.81
   9   7  -8    1.71    2.66
  -9  -7   8    0.00    2.26
   9  -7  -8    0.43    2.29
  -9  -7   7    5.94    2.23
   9   7  -7    9.98    3.79
  -9  -7   7    6.15    2.58
   9  -7  -7    6.64    2.46
  -9  -7   6    4.38    2.18
  -9  -7   6    3.99    2.41
   9  -7  -6    5.18    2.66
  -9  -7   5   24.11    3.64
   9  -7  -5   34.06    4.51
   9   7  -5   31.67    5.29
  -9  -7   5   28.12    4.59
   9  -7  -5   31.00    4.41
  -9  -7   4   33.63    4.37
   9  -7  -4   37.30    4.74
   9   7  -4   41.78    4.65
  -9  -7   4   33.20    4.81
   9  -7  -4   40.32    4.88
  -9  -7   3  118.32    8.64
   9  -7  -3  144.79    8.27
   9   7  -3  165.17    9.03
  -9  -7   3  131.29    8.95
   9  -7  -3  149.75    9.23
  -9  -7   2    3.74    2.63
   9  -7  -2    7.20    3.03
   9   7  -2    5.75    3.37
  -9  -7   2    7.93    3.15
   9  -7  -2    4.62    2.66
  -9  -7   1    5.23    2.17
   9  -7  -1    7.54    2.90
   9   7  -1    5.20    2.81
  -9  -7   1    5.54    2.72
   9  -7  -1    5.37    2.49
  -9  -7   0    0.31    2.15
   9  -7   0   -0.31    2.67
  -9  -7   0    0.24    2.32
  -9  -7  -1    1.56    2.35
   9   7   1    1.34    2.03
  -9  -7  -1    0.70    2.57
   9  -7   1    1.56    2.12
  -9  -7  -2    4.17    2.48
   9  -7   2    2.64    1.83
  -9  -7  -3    5.73    2.57
   9  -7   3    9.46    3.03
   9  -7   3    5.54    2.29
  -9  -7  -4    0.00    1.84
   9  -7   4    0.07    2.55
  -9  -7  -4    0.52    2.58
   9  -7   4    0.15    2.02
  -9  -7  -5    5.79    2.33
   9  -7   5    6.79    2.63
  -9  -7  -5    5.82    2.72
   9  -7   5    5.63    2.45
   9   7   5    5.63    2.72
  -9  -7  -6    1.96    1.93
   9  -7   6    2.60    2.24
  -9  -7  -6    3.65    2.72
   9   7   6    2.92    2.55
  -9  -7  -7    0.86    2.11
   9  -7   7    1.38    1.99
  -9  -7  -7    1.13    2.24
   9   7   7    1.68    2.54
  -9  -7  -8    1.80    2.02
   9  -7   8    1.11    1.97
  -9  -7  -8    1.50    2.29
   9   7   8    2.30    2.66
  -9  -7  -9    1.20    1.90
  -9  -7  -9    1.41    2.15
   9   7   9    1.23    2.41
  -9  -7 -10    0.07    1.83
   9   7  10    1.51    2.64
 -10   0  22   22.94    4.83
  10   0 -22   27.94    3.89
 -10   0  21    0.82    2.88
  10   0 -21    0.39    2.57
  10   0 -21    0.99    2.45
 -10   0  20    1.50    2.87
  10   0 -20    1.81    2.32
  10   0 -20    2.70    2.67
 -10   0  19    0.62    2.20
  10   0 -19    0.52    2.06
  10   0 -19   -0.34    2.67
 -10   0  18   23.62    4.51
  10   0 -18   25.58    4.10
  10   0 -18   33.39    4.42
 -10   0  17    1.78    2.72
 -10   0  17    0.43    2.14
 -10   0  16    2.21    2.69
 -10   0  16    0.95    2.92
 -10   0  15    0.04    2.48
 -10   0  15   -0.21    2.21
 -10   0  14  644.10   21.50
 -10   0  14  639.41   16.35
  10   0 -14  610.08   23.22
 -10   0  13    3.93    3.33
 -10   0  13    2.54    2.81
 -10   0  13    4.86    3.24
  10   0 -13    7.50    3.15
 -10   0  12  126.17    9.87
 -10   0  12  112.24    8.64
  10   0 -12  130.82    9.72
 -10   0  11    0.92    2.03
 -10   0  11    0.71    2.57
 -10   0  11    0.89    2.08
  10   0 -11    0.25    2.60
 -10   0  10  745.98   26.21
 -10   0  10  712.39   24.35
 -10   0  10  857.26   26.01
  10   0 -10  828.42   26.19
 -10   0   9   -0.37    2.94
 -10   0   9    0.33    2.76
  10   0  -9    0.37    2.64
 -10   0   8  169.20   10.91
 -10   0   8  177.97   10.45
  10   0  -8  175.66    9.77
 -10   0   7    0.70    2.87
 -10   0   6   35.37    4.87
 -10   0   3    1.26    3.64
 -10   0   2  592.28   17.49
 -10   0   1    5.51    3.93
  10   0   0  117.41    7.41
  10   0   1    0.33    2.12
  10   0   2   70.58    5.78
  10   0   3    0.40    1.96
  10   0   4   23.50    3.62
  10   0   4   20.53    3.37
  10   0   4   16.84    2.95
  10   0   5    0.53    1.77
  10   0   5    1.93    2.30
  10   0   5    0.18    1.40
  10   0   6   -0.18    2.02
  10   0   7    0.88    2.00
  10   0   8  279.97   12.32
  10   0   9    2.21    2.84
  10   0  10  295.80   12.29
  10   0  11    0.22    2.94
  10   0  12    2.23    3.03
  10   0  13   -0.09    2.21
  10   0  14   70.72    6.07
  10   0  15    1.63    2.72
  10   0  16   -0.04    2.58
  10   0  17    0.94    2.51
  10  -2 -22   45.76    7.22
  10  -2 -21    0.55    2.58
  10  -2 -21    0.95    2.15
  10  -2 -20  128.59   11.24
  10  -2 -20  139.03   11.74
  10  -2 -20  146.48   12.72
 -10  -2  19   66.65    5.43
  10  -2 -19   82.42    7.22
  10   2 -19   64.33    9.25
  10  -2 -19   85.52    6.70
  10  -2 -19   81.48    8.37
 -10  -2  18   11.33    2.82
 -10  -2  18    9.23    2.57
  10  -2 -18   13.90    3.37
  10  -2 -18   12.01    3.07
  10  -2 -18   13.91    3.19
 -10  -2  17   33.87    4.38
 -10  -2  17   28.33    4.02
  10  -2 -17   34.27    4.04
  10  -2 -17   33.38    4.78
 -10  -2  16  648.14   17.89
 -10  -2  16  527.53   15.52
  10  -2 -16  601.52   15.84
  10  -2 -16  603.65   20.55
 -10  -2  15  207.61   11.03
 -10  -2  15  174.29    9.53
  10  -2 -15  189.49    9.58
  10  -2 -15  178.00    9.98
  10  -2 -15  176.03   10.13
  10  -2 -15  153.99   10.04
 -10  -2  14  898.21   19.52
 -10  -2  14  869.73   19.67
  10  -2 -14  846.84   17.88
  10  -2 -14  900.97   18.80
  10  -2 -14  801.39   19.14
 -10  -2  13  192.29   10.91
 -10  -2  13  168.99    8.94
  10  -2 -13  184.06    8.83
  10  -2 -13  141.31    7.97
  10  -2 -13  158.14    7.96
 -10  -2  12   57.16    5.21
 -10   2  12   50.99    5.08
 -10   2  12   57.55    5.02
 -10  -2  12   54.76    4.71
  10  -2 -12   61.99    5.08
  10  -2 -12   51.59    4.45
  10  -2 -12   54.80    4.80
 -10  -2  11  703.99   25.28
 -10   2  11  575.99   19.46
 -10   2  11  721.01   24.75
 -10  -2  11  655.11   18.20
 -10  -2  10   96.74    6.50
  10   2 -10   92.08    6.44
 -10   2  10   92.08    8.34
 -10  -2  10   92.36    6.34
 -10  -2   9   80.52    7.14
  10   2  -9   80.80    5.42
 -10  -2   9   59.20    6.40
 -10   2   9   71.44    5.89
 -10  -2   9   68.59    5.91
  10  -2  -9   80.77    6.22
 -10  -2   8   34.92    4.60
  10   2  -8   27.73    3.31
 -10   2   8   29.89    4.02
 -10  -2   8   26.61    4.08
 -10   2   8   30.15    4.81
  10  -2  -8   34.09    4.23
  10   2  -8   27.39    4.39
 -10  -2   7    2.23    1.94
  10  -2  -7    3.01    1.56
  10   2  -7    3.53    1.96
 -10   2   7    1.78    3.21
 -10  -2   7    2.02    2.82
 -10  -2   7    2.67    2.91
  10  -2  -7    2.87    2.55
  10   2  -7    3.99    2.73
 -10  -2   6  195.00    9.77
  10   2  -6  150.19    9.19
 -10   2   6  176.58    9.55
 -10  -2   6  187.65   11.98
 -10  -2   6  201.79   10.20
  10  -2  -6  184.68    9.40
  10  -2  -6  170.70    8.58
 -10   2   5  447.09   14.67
 -10  -2   5  450.02   17.55
 -10  -2   5  498.24   18.13
  10  -2  -5  438.90   13.85
 -10   2   4  326.00   12.74
 -10  -2   4  292.56   11.55
  10   2  -3  324.07   13.12
 -10   2   3  316.87   13.51
  10   2  -2  257.64   10.96
 -10   2   2  232.18   11.94
  10  -2  -1   57.35    4.59
  10   2  -1   55.16    5.78
 -10   2   1   56.46    6.01
  10   2  -1   46.66    5.03
  10  -2   0  114.41    6.49
  10   2   0  101.23    5.67
  10   2   0  112.41    6.68
 -10   2   0  112.48    8.55
  10   2   0  114.62    8.48
  10   2   0   96.61    6.43
  10   2   1    1.83    2.29
  10  -2   1    4.02    2.33
  10   2   1    1.51    1.38
 -10   2  -1    2.63    3.04
  10   2   1    1.89    2.60
  10   2   2  116.31    8.05
  10  -2   2  154.25    7.96
  10   2   2  126.71    6.40
  10   2   2  154.02    7.94
  10   2   2  154.56    9.06
  10   2   2  111.93    6.16
  10   2   3   33.73    4.45
  10  -2   3   41.50    4.16
  10   2   3   39.69    4.05
  10   2   3   45.89    5.36
  10   2   3   35.11    3.53
  10   2   4    3.06    2.58
  10  -2   4    3.36    1.77
  10   2   4    4.31    2.95
  10   2   4    3.01    2.95
  10   2   4    3.82    2.35
  10   2   5  361.54   15.37
  10  -2   5  399.00   12.75
  10   2   5  434.44   15.10
  10   2   5  433.21   16.60
  10   2   5  340.99   14.15
  10   2   6  322.24   14.91
  10   2   6  289.19   11.92
  10   2   6  343.62   14.10
  10   2   6  319.33   12.29
  10   2   7   36.52    5.02
  10   2   7   38.91    4.39
  10   2   7   41.11    4.57
  10   2   8   54.25    5.81
  10  -2   8   49.04    4.65
  10   2   8   53.21    4.84
  10   2   9   14.54    3.71
  10  -2   9   14.82    3.04
  10   2   9   16.06    3.04
  10   2  10   61.04    7.60
  10   2  10   63.68    5.86
  10  -2  10   55.48    4.69
  10   2  10   59.46    6.28
  10   2  11    2.03    2.75
  10   2  11    3.67    3.47
  10  -2  11    2.66    2.03
  10   2  11    1.96    2.06
  10   2  12   38.53    5.12
  10   2  12   45.58    5.24
  10  -2  12   40.38    4.22
  10   2  12   40.22    4.68
  10   2  13   43.52    6.10
  10   2  13   48.97    4.74
  10  -2  13   42.31    4.34
  10   2  14  118.20    7.99
  10  -2  14  110.37    7.65
  10   2  15    2.32    2.90
  10  -2  15    3.18    2.54
  10   2  16    2.02    2.46
  10  -2  16    2.41    2.52
 -10  -4  20   19.46    3.98
 -10  -4  20   20.83    3.39
  10  -4 -20   33.06    5.86
 -10  -4  19    2.02    2.33
 -10  -4  19    2.35    1.81
  10  -4 -19    2.95    2.92
  10  -4 -19    2.57    2.42
 -10  -4  18   68.09    7.05
 -10  -4  18   67.73    6.31
  10  -4 -18   76.94    7.81
  10  -4 -18   90.61    9.37
 -10  -4  17   79.83    6.83
 -10  -4  17   85.95    6.04
  10  -4 -17   90.12    7.99
  10  -4 -17   90.85    7.54
 -10  -4  16   71.28    5.97
  10  -4 -16   74.67    7.08
  10  -4 -16   75.82    6.93
 -10  -4  15   21.88    3.53
 -10  -4  15   18.23    3.28
  10  -4 -15   27.82    4.56
  10  -4 -15   25.57    3.58
 -10  -4  14   28.05    3.76
 -10  -4  14   25.54    4.08
  10  -4 -14   34.96    4.29
  10  -4 -14   30.50    4.10
 -10  -4  13  138.15    7.88
 -10  -4  13  120.25    7.97
  10  -4 -13  131.98    7.50
  10  -4 -13  133.46    6.61
  10  -4 -13  123.60    7.97
 -10  -4  12  226.27   12.61
  10   4 -12  227.40   10.56
 -10  -4  12  199.53   10.35
  10  -4 -12  254.33   11.83
  10  -4 -12  262.07   11.09
  10  -4 -12  208.77   10.63
 -10  -4  11   72.01    6.18
  10   4 -11   81.85    5.06
 -10  -4  11   67.08    5.51
  10  -4 -11   83.92    5.78
  10  -4 -11   87.97    5.81
  10  -4 -11   80.87    7.44
 -10  -4  10  196.49   10.84
  10   4 -10  180.36    8.54
 -10  -4  10  179.59    9.18
  10  -4 -10  172.91   10.81
  10  -4 -10  217.20    9.43
  10  -4 -10  186.79   11.17
 -10  -4   9  255.90   11.55
  10   4  -9  249.39   10.35
 -10   4   9  222.20   11.92
 -10  -4   9  235.02   11.02
  10  -4  -9  245.04   11.37
 -10  -4   8   17.06    2.98
  10   4  -8   19.17    3.31
 -10   4   8   10.23    3.39
 -10  -4   8   15.54    3.10
  10  -4  -8   10.91    2.54
 -10  -4   7   44.56    5.75
  10  -4  -7   44.44    4.62
  10   4  -7   46.93    4.48
 -10   4   7   41.51    4.68
 -10  -4   7   43.67    4.59
  10  -4  -7   47.11    4.38
  10  -4  -7   34.85    4.26
  10  -4  -6  176.28    8.40
  10   4  -6  168.80    8.42
 -10   4   6  154.63    9.18
 -10  -4   6  176.16    9.26
  10  -4  -6  167.73    8.20
  10  -4  -6  131.38    8.21
  10  -4  -5  193.49    8.86
  10  -4  -5  181.11    9.06
  10  -4  -4  104.79    6.37
  10   4  -4  104.85    6.92
  10  -4  -4   88.07    5.97
  10  -4  -3  698.65   22.49
  10   4  -3  762.86   23.19
  10   4  -3  676.58   26.74
 -10  -4   3  737.22   24.44
  10  -4  -3  621.05   18.81
  10  -4  -3  602.02   18.08
  10   4  -3  635.28   23.84
 -10  -4   2   34.15    4.05
  10  -4  -2   38.81    4.14
  10   4  -2   37.22    4.10
  10   4  -2   37.67    5.14
 -10  -4   2   34.80    4.45
  10  -4  -2   32.31    4.41
  10  -4  -2   35.96    3.85
  10   4  -2   38.78    5.54
 -10  -4   1   33.50    3.53
  10  -4  -1   39.39    4.14
  10   4  -1   32.29    4.22
  10   4  -1   35.66    5.27
 -10  -4   1   37.01    4.20
  10  -4  -1   33.33    4.08
  10   4  -1   29.93    4.44
 -10  -4   0  220.12   10.48
  10   4   0  231.51   10.82
  10   4   0  242.59   11.98
 -10  -4   0  231.81   11.14
  10  -4   0  218.94   10.07
  10   4   0  204.36    9.87
 -10  -4  -1  200.75    9.16
  10  -4   1  233.26   10.26
  10   4   1  182.07    9.29
  10   4   1  176.68   12.25
 -10  -4  -1  212.43   11.11
  10  -4   1  201.62   10.23
  10   4   1  186.95   10.35
 -10  -4  -2    3.15    2.33
  10  -4   2    3.50    2.27
  10   4   2    2.12    1.72
  10   4   2    1.71    2.12
 -10  -4  -2    1.87    2.06
  10  -4   2    2.82    2.45
  10   4   2    1.41    2.42
  10   4   3   29.96    4.10
  10  -4   3   41.68    3.77
  10   4   3   31.95    5.66
  10   4   3   35.19    5.08
 -10  -4  -3   34.48    4.48
  10  -4   3   38.36    5.20
  10   4   3   37.06    4.35
  10   4   4   54.99    5.33
  10  -4   4   67.48    4.91
  10   4   4   58.59    5.60
 -10  -4  -4   68.59    7.39
  10  -4   4   61.45    5.30
  10   4   4   69.16    5.67
  10   4   5    9.86    3.61
  10  -4   5    9.77    2.20
  10   4   5    8.45    3.89
 -10  -4  -5   11.05    3.16
  10  -4   5    8.95    2.23
  10   4   5    9.26    3.18
  10   4   6   29.01    4.35
  10  -4   6   36.18    3.65
  10   4   6   32.19    4.87
 -10  -4  -6   32.08    4.34
  10  -4   6   32.49    4.02
  10   4   7    6.87    3.28
  10  -4   7    5.95    2.03
  10   4   7    6.22    3.92
  10  -4   7    5.21    1.92
  10   4   8   31.62    4.20
  10   4   8   37.44    5.20
  10   4   8   39.12    4.29
  10   4   9    6.83    3.82
  10   4   9    6.03    3.61
  10   4   9    8.36    2.67
  10   4  10   27.91    4.04
  10   4  10   32.16    4.78
  10   4  10   32.62    3.82
  10   4  11   11.06    3.82
  10   4  11   11.00    3.79
  10   4  11   11.43    3.30
  10   4  12    0.88    2.91
  10   4  12    1.81    2.94
  10   4  12    1.84    2.58
  10   4  13   16.06    3.76
  10   4  13   14.85    3.67
  10   4  13   18.96    3.64
  10   4  14    0.28    2.27
  10   4  14    0.30    2.15
 -10  -6  16    1.50    1.97
  10  -6 -16    1.53    2.38
  10  -6 -16    1.56    2.15
 -10  -6  15   10.88    2.79
  10  -6 -15   13.79    3.25
  10  -6 -15   16.54    3.44
 -10  -6  14  127.22   13.10
  10  -6 -14  157.08   14.97
  10  -6 -14  171.74   15.89
 -10  -6  13   18.57    3.80
  10   6 -13   23.90    4.42
  10  -6 -13   19.85    4.39
 -10  -6  12  125.47    8.79
  10   6 -12  160.66   10.36
 -10  -6  12  100.44    8.89
  10  -6 -12  155.94    9.32
 -10  -6  11  114.66    7.54
  10   6 -11  135.36    8.15
 -10  -6  11  102.71    7.91
  10  -6 -11  124.24    8.79
 -10  -6  10   14.43    2.81
  10   6 -10   15.31    3.93
 -10  -6  10   12.74    2.73
  10  -6 -10   16.06    4.31
 -10  -6   9  170.52    9.74
  10   6  -9  218.85   11.89
 -10  -6   9  185.95   12.22
  10  -6  -9  204.44   11.39
 -10  -6   8   14.18    3.03
  10   6  -8   14.91    3.33
 -10  -6   8   15.87    3.90
  10  -6  -8   14.95    3.82
 -10  -6   7    3.34    2.67
  10   6  -7    5.36    3.31
 -10  -6   7    4.28    3.21
  10  -6  -7    3.22    2.57
 -10  -6   6  209.39   10.47
  10  -6  -6  200.61   10.65
 -10  -6   6  204.49    9.92
  10  -6  -6  209.88   11.36
 -10  -6   5  145.04    8.11
  10  -6  -5  137.84    9.40
  10   6  -5  140.36    8.61
 -10  -6   5  155.58    8.77
  10  -6  -5  132.79   10.39
 -10  -6   4  313.44   12.55
  10  -6  -4  320.16   12.68
  10   6  -4  328.54   11.60
 -10  -6   4  333.27   14.15
  10  -6  -4  285.63   15.37
 -10  -6   3   37.15    4.22
  10  -6  -3   41.99    4.11
  10   6  -3   32.32    4.32
 -10  -6   3   34.88    4.51
  10  -6  -3   34.21    5.30
 -10  -6   2   40.92    4.04
  10  -6  -2   48.02    4.47
  10   6  -2   46.23    4.50
 -10  -6   2   43.37    5.06
  10  -6  -2   39.64    5.09
 -10  -6   1    5.64    2.43
  10  -6  -1    7.78    3.00
  10   6  -1    5.61    2.27
 -10  -6   0   54.49    4.93
  10  -6   0   59.33    5.14
  10   6   0   46.68    5.17
  10   6   1    2.21    2.14
 -10  -6  -1    3.74    2.58
  10   6   1    2.60    2.84
 -10  -6  -2  115.57    6.61
  10  -6   2  165.66    7.82
 -10  -6  -2  128.47    7.84
  10   6   2  119.46    8.74
 -10  -6  -3   28.43    3.36
  10  -6   3   39.11    4.48
 -10  -6  -3   31.98    4.04
  10   6   3   29.81    4.13
 -10  -6  -4    1.63    1.94
  10  -6   4    1.38    2.17
 -10  -6  -4    1.59    2.81
  10   6   4    0.77    2.64
 -10  -6  -5   -0.31    1.54
  10  -6   5   -0.09    2.30
 -10  -6  -5    0.40    2.58
  10   6   5   -0.15    2.06
 -10  -6  -6    0.50    1.78
  10  -6   6    0.99    2.12
 -10  -6  -6    0.73    2.85
  10   6   6    0.58    2.61
 -10  -6  -7   11.11    2.49
  10  -6   7   12.17    2.60
 -10  -6  -7   12.75    3.27
  10   6   7   13.36    3.34
 -10  -6  -8   18.59    3.03
  10  -6   8   18.40    3.15
 -10  -6  -8   19.58    4.28
  10   6   8   21.63    3.85
 -10  -6  -9    4.86    2.20
 -10  -6  -9    4.86    2.72
  10   6   9    6.30    2.92
 -10  -6 -10   -0.31    1.93
  10   6  10    0.27    2.39
  10   6  11   13.33    3.15
  10   8 -10   38.94    5.60
  10   8  -9    2.21    2.32
  10   8  -8   26.07    4.16
  10  -8  -8   19.81    5.58
  10  -8  -7  157.44   12.89
  10   8  -6  226.85   10.10
 -10  -8   6  166.01   11.89
  10  -8  -6  184.18   11.05
  10   8  -5    5.51    2.78
 -10  -8   5    4.56    2.60
  10  -8  -4    1.89    2.14
  10   8  -4    2.75    2.57
 -10  -8   4    1.17    2.24
  10  -8  -4    2.15    2.03
 -10  -8   3    1.16    1.96
  10  -8  -3    1.40    2.23
  10   8  -3    1.48    2.29
 -10  -8   3    0.86    2.36
  10  -8  -3    1.29    2.05
 -10  -8   2    9.16    2.75
  10  -8  -2   10.91    2.87
  10   8  -2   10.93    2.63
 -10  -8   2    9.49    2.85
  10  -8  -2    9.44    2.67
  10  -8  -1    0.59    2.39
  10   8  -1    0.79    1.97
 -10  -8   1    0.98    2.39
  10  -8  -1    1.19    2.02
 -10  -8   0   26.74    4.16
  10  -8   0   31.55    4.38
 -10  -8   0   25.37    4.08
 -10  -8  -1    5.30    3.30
  10  -8   1    7.05    2.72
 -10  -8  -1    5.18    2.51
 -10  -8  -2    4.39    2.39
 -10  -8  -2    5.05    2.58
 -10  -8  -3    5.40    3.50
  10  -8   3    5.95    2.57
  10  -8   4   29.09    5.26
 -10  -8  -4   28.36    4.48
 -11  -1  22   87.03   10.39
  11   1 -22  113.18   10.38
 -11   1  21    5.14    3.00
 -11  -1  21    4.83    2.73
  11  -1 -21    6.32    2.90
  11   1 -21    5.08    3.06
  11  -1 -21    5.98    2.64
  11   1 -21    7.63    2.66
 -11   1  20   81.30   11.09
 -11  -1  20   90.29   10.04
  11  -1 -20  111.26   11.11
  11   1 -20   91.44   10.85
  11  -1 -20  117.37   12.41
  11   1 -20  117.59   11.71
 -11   1  19   48.89    7.33
 -11  -1  19   55.14    5.63
  11  -1 -19   66.31    5.86
  11   1 -19   53.73    7.14
  11  -1 -19   69.37    7.26
  11   1 -19   63.62    5.08
 -11   1  18    1.53    2.29
 -11  -1  18    1.92    2.90
 -11  -1  18    0.77    2.88
  11  -1 -18    1.47    2.73
  11  -1 -18    1.22    2.58
 -11   1  17   42.46    5.98
 -11  -1  17   50.32    6.37
 -11  -1  17   46.32    4.97
  11  -1 -17   56.89    5.03
  11  -1 -17   58.96    5.37
 -11   1  16    2.57    2.36
 -11  -1  16    2.51    3.15
 -11  -1  16    2.30    3.00
  11  -1 -16    2.52    2.12
 -11  -1  15   94.95    8.60
 -11  -1  15   90.55    7.05
  11  -1 -15   96.68    6.58
  11  -1 -15   95.72    6.79
 -11  -1  14   40.16    5.88
 -11   1  14   36.95    4.48
 -11  -1  14   39.52    4.48
  11  -1 -14   37.58    4.48
  11  -1 -14   36.92    4.68
 -11  -1  13   11.89    2.84
 -11   1  13   10.24    3.52
 -11  -1  13   10.59    3.40
  11  -1 -13   13.18    2.76
  11  -1 -13    9.16    2.78
  11   1 -13   11.39    3.56
 -11  -1  12 1075.67   35.71
 -11   1  12  928.70   31.82
 -11   1  12 1051.35   30.85
  11  -1 -12  877.17   29.69
  11  -1 -12 1125.07   32.11
  11   1 -12  990.48   34.33
 -11  -1  11   18.14    3.92
 -11   1  11   15.16    5.27
 -11  -1  11   14.16    4.02
 -11   1  11   16.54    5.21
  11  -1 -11   25.46    4.07
  11   1 -11   18.32    4.80
 -11  -1  10  179.41   11.22
  11   1 -10  197.54    8.92
 -11   1  10  169.02    9.62
 -11  -1  10  159.44   11.06
 -11   1  10  184.74    9.71
 -11  -1  10  185.53    9.75
  11  -1 -10  196.46    9.84
  11   1 -10  186.41   11.60
 -11  -1   9   20.16    3.33
  11   1  -9   20.22    2.97
 -11   1   9   17.61    3.37
 -11  -1   9   19.72    3.85
 -11   1   9   23.24    4.29
 -11  -1   9   22.66    3.40
  11  -1  -9   22.82    3.62
  11   1  -9   19.55    4.01
 -11  -1   8   96.05    8.60
  11   1  -8   86.07    6.76
 -11   1   8   85.16    6.81
 -11  -1   8   93.40    7.68
 -11   1   8  104.67    7.99
 -11  -1   8  106.78    8.18
  11   1  -8   97.86    7.14
 -11  -1   7  623.25   23.58
  11   1  -7  564.40   17.71
 -11  -1   7  580.77   20.95
 -11   1   7  643.76   22.61
 -11  -1   7  659.26   23.50
  11  -1  -7  593.23   22.63
  11  -1  -7  581.07   19.70
  11   1  -7  553.07   18.96
 -11  -1   6   56.83    7.57
  11  -1  -6   58.19    4.42
  11   1  -6   72.20    4.77
 -11   1   6   68.46    5.98
 -11  -1   6   62.74    6.90
 -11  -1   6   63.90    7.04
  11  -1  -6   55.88    7.04
  11  -1  -6   65.46    6.74
  11   1  -6   74.90    6.16
  11  -1  -5  418.23   13.10
  11   1  -5  445.46   13.60
 -11   1   5  453.05   15.98
 -11  -1   5  484.05   18.63
 -11  -1   5  501.57   18.02
  11  -1  -5  476.95   17.99
  11  -1  -5  457.69   14.70
  11   1  -5  457.01   17.16
  11  -1  -4    4.23    1.69
  11   1  -4    4.05    1.53
 -11   1   4    4.31    2.67
 -11  -1   4    5.06    3.31
  11  -1  -4    4.88    2.73
  11  -1  -4    4.35    2.73
  11   1  -4    3.55    2.55
  11  -1  -3  106.85    5.89
 -11   1   3  135.57    8.60
 -11  -1   3  126.29    9.07
  11  -1  -3  133.64    9.31
  11  -1  -3  119.37    9.21
  11   1  -3  126.20    7.87
  11   1  -2   96.21    5.36
 -11   1   2  120.99    8.08
  11  -1  -2  124.92    8.24
  11  -1  -2   88.76    7.04
  11  -1  -1   26.35    3.43
  11   1  -1   20.90    3.67
  11   1  -1   28.97    3.99
 -11   1   1   32.17    4.90
  11   1  -1   25.37    4.84
  11  -1  -1   24.82    3.89
  11   1  -1   27.87    3.77
  11  -1   0   13.54    2.09
  11   1   0   12.13    2.05
  11   1   0   15.69    3.73
 -11   1   0   16.26    3.64
  11   1   0   14.91    3.89
  11  -1   0   12.65    2.76
  11   1   0   13.08    3.15
  11  -1   1   94.37    5.67
  11   1   1   95.23    6.34
  11   1   1  105.16    7.69
 -11   1  -1  108.24    7.78
  11   1   1  100.13    8.24
  11  -1   1   82.25    6.49
  11   1   1   95.73    7.20
  11  -1   2    3.22    1.44
  11   1   2    3.86    1.77
  11   1   2    3.83    2.88
 -11   1  -2    3.50    3.19
  11   1   2    5.29    2.69
  11  -1   2    2.23    2.20
  11   1   2    4.19    2.76
  11  -1   3  167.04    7.75
  11   1   3  149.69    7.57
  11   1   3  183.48    9.31
 -11   1  -3  177.01   11.14
  11   1   3  180.85   11.27
  11   1   3  164.27    8.64
  11  -1   4   96.48    6.44
  11   1   4   90.66    6.81
  11   1   4   90.48    7.74
  11   1   4   78.36    6.10
  11   1   5  122.79    7.97
  11   1   5  145.34    8.70
  11  -1   5  124.20    7.78
  11   1   5  135.81    7.41
  11   1   6   27.93    4.32
  11   1   6   31.67    4.59
  11  -1   6   25.23    4.77
  11   1   6   23.84    3.34
  11   1   7  435.09   17.37
  11  -1   7  399.48   16.72
  11   1   7  357.19   13.90
  11   1   8  242.54   10.79
  11  -1   8  202.95    9.32
  11   1   8  225.07   11.61
  11   1   9    2.90    2.97
  11  -1   9    2.12    2.39
  11   1   9    3.77    2.39
  11   1  10  155.33    8.77
  11  -1  10  139.64    9.00
  11   1  11   15.04    3.55
  11  -1  11   13.78    3.30
  11   1  12    0.70    3.21
  11  -1  12    1.20    2.84
  11   1  13   92.19    6.76
  11  -1  13   94.07    8.20
  11  -1  14  103.90   11.54
  11  -1  15  125.10   10.05
  11  -1  16    2.90    2.64
 -11  -3  21   11.68    3.24
  11  -3 -21   14.79    4.05
  11   3 -21   17.86    3.71
 -11  -3  20   30.50    3.82
  11  -3 -19    2.23    2.18
 -11  -3  18    1.63    1.86
 -11  -3  18    1.07    2.14
  11  -3 -18    2.00    2.88
  11  -3 -18    2.14    2.32
 -11  -3  17   49.10    5.15
 -11  -3  17   37.09    4.50
  11  -3 -17   52.23    6.58
  11  -3 -17   52.51    7.57
 -11  -3  16   13.66    2.79
  11  -3 -16   18.99    3.65
 -11  -3  15    1.75    2.08
  11  -3 -15    2.20    2.23
  11  -3 -15    2.54    2.20
  11  -3 -15    1.83    1.68
 -11  -3  14    6.50    2.49
 -11  -3  14    4.97    2.61
  11  -3 -14    6.01    3.03
  11  -3 -14    4.16    1.97
  11  -3 -14    4.05    2.02
 -11  -3  13    2.05    2.84
 -11  -3  13    1.37    2.76
  11  -3 -13    1.32    2.67
  11  -3 -13    2.57    1.87
  11  -3 -13    0.89    1.43
 -11  -3  12  177.14    9.26
 -11  -3  12  172.17    9.28
  11  -3 -12  144.91    7.62
  11  -3 -12  184.95    8.79
 -11  -3  11   21.87    4.29
  11   3 -11   21.32    2.72
 -11  -3  11   20.49    3.67
  11  -3 -11   19.78    3.50
  11  -3 -11   22.54    3.07
  11  -3 -11   19.66    3.79
 -11  -3  10  136.03    8.42
  11   3 -10  110.46    6.87
 -11  -3  10  131.63    8.06
  11  -3 -10   96.58    8.48
  11  -3 -10  137.93    8.18
  11  -3 -10  113.62    8.48
 -11  -3   9  224.50   10.50
  11   3  -9  198.46    9.06
 -11   3   9  181.02   12.34
 -11  -3   9  200.06   10.35
  11  -3  -9  188.71   11.21
 -11  -3   8  187.62   11.22
  11  -3  -8  150.13    8.33
  11   3  -8  162.04    7.50
 -11   3   8  153.10    9.03
  11  -3  -8  160.36    7.44
  11  -3  -8  132.26    8.73
 -11  -3   7  287.34   14.97
  11  -3  -7  294.46   11.67
  11   3  -7  272.82   10.33
 -11   3   7  275.53   12.80
  11  -3  -7  247.04    9.72
  11  -3  -7  261.92   11.55
  11   3  -7  240.82   12.98
 -11  -3   6    0.85    2.39
  11  -3  -6    0.39    1.89
  11   3  -6    0.37    1.90
 -11   3   6    0.85    2.29
 -11  -3   6    0.64    1.96
 -11  -3   6    0.70    2.90
  11  -3  -6    1.20    2.32
  11  -3  -6    0.01    2.02
  11   3  -6    1.01    2.02
 -11  -3   5   72.84    6.15
  11  -3  -5   70.89    5.12
 -11   3   5   70.49    6.30
 -11  -3   5   57.07    6.25
 -11  -3   5   76.39    6.24
  11  -3  -5   66.65    4.90
  11  -3  -5   58.19    5.63
  11   3  -5   62.42    7.22
 -11  -3   4  234.45   11.28
  11  -3  -4  269.76   10.88
  11   3  -4  189.48   11.85
 -11   3   4  244.37   12.66
 -11  -3   4  198.60   12.31
 -11  -3   4  221.88   11.22
  11  -3  -4  220.32    9.46
  11  -3  -4  172.87   13.27
  11   3  -4  239.13   12.62
 -11  -3   3    0.31    2.21
  11  -3  -3    0.45    2.08
  11   3  -3    1.02    2.06
  11   3  -3    0.37    2.00
 -11   3   3    1.17    2.98
 -11  -3   3    0.34    2.41
  11  -3  -3    0.56    2.72
  11  -3  -3    0.48    1.97
  11   3  -3    0.30    1.92
 -11  -3   2    2.35    2.55
  11  -3  -2    1.87    1.96
  11   3  -2    1.74    1.63
  11   3  -2    1.38    2.76
 -11  -3   2    2.21    2.08
  11  -3  -2    1.46    2.38
  11  -3  -2    1.41    1.65
  11   3  -2    1.80    2.87
 -11  -3   1   34.71    4.23
  11   3  -1   35.44    3.52
  11   3  -1   34.10    4.31
 -11  -3   1   32.81    4.19
  11  -3  -1   37.39    4.41
  11   3  -1   35.22    4.20
 -11  -3   0   19.67    3.40
  11  -3   0   26.18    3.31
  11   3   0   19.64    3.16
  11   3   0   23.04    3.74
 -11  -3   0   19.75    3.61
  11  -3   0   24.11    4.10
  11   3   0   20.46    3.10
 -11  -3  -1   80.84    6.74
  11  -3   1   87.38    5.85
  11   3   1   81.41    6.00
  11   3   1   81.21    6.53
  11   3   1   71.83    6.65
 -11  -3  -1   79.73    8.91
  11  -3   1   93.27    6.84
  11   3   1   77.67    6.47
 -11  -3  -2    0.33    2.18
  11  -3   2    1.26    1.87
  11   3   2    0.49    1.80
  11   3   2    1.83    2.92
  11   3   2    0.86    3.82
 -11  -3  -2    0.33    2.02
  11  -3   2    1.57    2.87
  11   3   2    0.68    2.63
  11  -3   3  333.97   12.84
  11  -3   3  316.27   14.74
  11   3   5  462.77   15.50
  11  -3   5  588.66   15.07
  11   3   5  533.44   15.56
  11   3   6   62.08    6.06
  11  -3   6   89.74    6.68
  11   3   6   73.08    6.73
  11   3   6   76.03    5.89
  11   3   7  136.74    9.34
  11   3   7  167.62   10.78
  11   3   7  158.21    8.25
  11   3   8   52.72    5.14
  11   3   8   66.23    5.91
  11   3   8   66.34    5.14
  11   3   9   19.95    3.46
  11   3   9   26.99    4.59
  11   3   9   25.76    3.90
  11   3  10    0.86    2.95
  11   3  10    2.20    3.86
  11   3  10    0.59    2.61
  11   3  11    1.16    2.78
  11   3  11    1.48    3.39
  11  -3  11    1.90    1.87
  11   3  11    1.13    2.67
  11   3  12  119.68   10.81
  11   3  12  149.12   11.86
  11   3  12  141.14   12.37
  11   3  13    0.50    2.35
  11   3  13    1.16    2.97
  11   3  13    0.85    2.33
  11   3  14   67.55    6.49
 -11  -5  18    0.15    2.03
 -11  -5  18    0.16    1.72
  11  -5 -18   -0.58    2.39
 -11  -5  17    3.49    2.29
 -11  -5  17    3.28    1.87
  11  -5 -17    4.45    2.57
  11  -5 -17    4.65    2.36
 -11  -5  16   20.96    3.95
 -11  -5  16   24.66    3.67
  11  -5 -16   25.17    4.23
  11  -5 -16   26.13    4.54
 -11  -5  15    1.05    2.42
  11  -5 -15    0.64    2.21
  11  -5 -15    0.86    1.97
 -11  -5  14    0.52    2.48
 -11  -5  14    0.76    1.94
  11  -5 -14    1.37    2.41
  11  -5 -14    0.74    1.78
 -11  -5  13   69.38    5.54
  11   5 -13   77.43    5.54
 -11  -5  13   59.97    5.86
  11  -5 -13   67.05    6.84
  11  -5 -13   72.31    6.27
 -11  -5  12   31.88    3.65
  11   5 -12   36.76    4.10
 -11  -5  12   25.86    3.53
  11  -5 -12   31.59    4.42
 -11  -5  11   20.74    3.27
  11   5 -11   26.52    3.27
 -11  -5  11   22.27    3.62
  11  -5 -11   23.89    3.53
 -11  -5  10   32.89    4.10
  11   5 -10   32.90    3.37
 -11  -5  10   30.60    4.04
 -11  -5   9    2.67    2.58
  11   5  -9    2.72    2.58
 -11  -5   9    2.92    2.66
 -11  -5   8   35.71    4.29
  11   5  -8   36.91    3.98
 -11  -5   8   34.64    4.50
 -11  -5   7   92.02    8.14
  11  -5  -7   83.69    6.19
  11   5  -7   98.05    5.92
 -11  -5   7   86.26    6.53
 -11  -5   6   41.53    4.57
  11  -5  -6   37.79    3.90
 -11  -5   6   41.54    5.24
 -11  -5   5    8.51    2.75
  11  -5  -5    8.36    2.66
  11   5  -5    9.06    3.03
 -11  -5   5   10.21    3.76
 -11  -5   4  509.79   21.62
  11  -5  -4  505.65   17.83
  11   5  -4  473.91   17.42
 -11  -5   3  202.84   10.62
  11  -5  -3  206.55    9.90
  11   5  -3  198.03    9.67
 -11  -5   3  209.30   12.53
  11  -5  -2  267.81   10.91
  11   5  -2  262.90   10.99
 -11  -5   2  245.11   12.29
  11   5  -2  225.94   14.82
  11  -5  -1  602.53   19.46
  11   5  -1  555.65   18.56
 -11  -5   1  604.86   22.24
  11   5  -1  608.17   25.88
  11   5   0   66.32    5.63
 -11  -5   0   80.52    6.95
  11   5   0   60.52    6.07
  11  -5   1   26.98    3.15
  11   5   1   23.09    2.90
 -11  -5  -1   28.30    4.13
  11  -5   1   19.05    3.62
  11   5   1   26.01    4.20
  11  -5   2  201.52    8.21
  11   5   2  148.60    8.51
 -11  -5  -2  196.66   12.28
  11   5   2  174.57   10.36
 -11  -5  -3    1.51    1.94
  11  -5   3    4.23    2.58
 -11  -5  -3    4.41    3.36
  11  -5   3    3.22    2.20
  11   5   3    3.44    2.39
 -11  -5  -4  113.74    6.95
  11  -5   4  126.91    6.99
 -11  -5  -4  128.83   10.60
  11   5   4  133.79    7.63
 -11  -5  -5   65.52    5.48
  11  -5   5   77.18    5.55
 -11  -5  -5   70.33    7.94
  11   5   5   76.51    6.35
 -11  -5  -6   89.08    5.79
  11  -5   6   99.54    5.73
 -11  -5  -6  106.44   10.38
  11   5   6  117.01    7.26
 -11  -5  -7   96.80    7.32
  11  -5   7   99.83    6.90
 -11  -5  -7   89.28    9.41
  11   5   7  115.32    6.99
 -11  -5  -8   29.62    3.82
  11   5   8   36.39    4.47
 -11  -5  -9   11.05    2.64
 -11  -5 -10   14.24    3.00
  11   5  10   14.10    3.41
 -11  -5 -11   28.14    3.73
  11   5  11   31.24    3.88
 -11  -5 -12    6.16    2.27
  11   5  12    7.14    2.72
 -11  -7  13    7.04    2.32
 -11  -7  12    1.07    1.97
  11   7 -12    1.05    2.36
  11  -7 -12    1.01    2.09
 -11  -7  11    3.89    2.27
  11   7 -11    6.21    2.61
  11  -7 -11    4.51    2.32
 -11  -7  10   11.70    2.97
  11   7 -10   15.74    3.24
 -11  -7  10   10.73    3.12
  11  -7 -10   14.68    3.22
 -11  -7   9    2.20    2.09
  11   7  -9    4.13    2.38
 -11  -7   9    2.03    2.33
  11  -7  -9    2.52    2.61
 -11  -7   8    0.91    2.00
  11   7  -8    1.99    2.46
 -11  -7   8    1.44    2.33
 -11  -7   7   47.73    6.10
 -11  -7   7   50.45    6.80
  11  -7  -7   66.34    7.22
 -11  -7   6   32.29    4.86
  11  -7  -6   30.87    5.51
  11   7  -6   36.46    4.84
 -11  -7   6   33.75    5.45
  11  -7  -6   33.96    5.45
 -11  -7   5    0.61    2.15
  11  -7  -5    2.63    2.42
  11   7  -5    2.82    2.63
 -11  -7   5    0.68    2.94
 -11  -7   4   16.02    3.21
  11  -7  -4   16.29    3.36
  11   7  -4   16.91    3.27
 -11  -7   4   15.08    3.76
 -11  -7   3   58.26    5.66
  11  -7  -3   64.72    6.03
  11   7  -3   61.57    5.72
 -11  -7   3   62.97    6.38
 -11  -7   2   16.20    3.83
  11  -7  -2   24.38    4.38
  11   7  -2   18.81    3.12
 -11  -7   2   14.92    3.22
  11  -7  -1    9.22    3.10
  11   7  -1    7.71    2.49
 -11  -7   1    7.16    3.04
 -11  -7   0  139.25   11.45
  11  -7   0  182.00   14.52
  11   7   0  148.03   11.94
 -11  -7  -1    4.47    2.94
 -11  -7  -2   16.87    4.29
  11  -7   2   22.81    4.45
 -11  -7  -2   16.75    3.33
 -11  -7  -3   75.96    8.23
  11  -7   3   91.04    9.81
 -11  -7  -3   82.88    9.72
 -11  -7  -4   25.60    3.77
  11  -7   4   30.44    4.14
 -11  -7  -4   26.71    4.17
 -11  -7  -5   14.65    3.10
  11  -7   5   16.79    2.98
 -11  -7  -5   15.95    3.39
  11   7   5   16.02    4.19
 -11  -7  -6    8.40    2.55
  11  -7   6    9.31    2.39
 -11  -7  -6    8.23    2.79
  11   7   6   10.02    3.43
 -11  -7  -7    3.33    2.36
 -12   0  21    0.40    2.48
  12   0 -21   -0.39    2.45
  12   0 -21    0.22    2.21
 -12   0  20   96.45   12.07
  12   0 -20  130.27   14.18
  12   0 -20  143.51   14.27
 -12   0  19    0.39    2.55
  12   0 -19   -0.58    2.12
  12   0 -19    0.45    2.18
 -12   0  18   66.26    7.56
  12   0 -18   73.20    6.84
  12   0 -18   78.50    7.36
 -12   0  17    0.71    2.52
  12   0 -17    0.68    2.33
 -12   0  16  112.08   10.21
 -12   0  16  111.96    9.53
  12   0 -16  136.95    9.71
 -12   0  15    0.71    2.63
  12   0 -15    1.05    2.09
 -12   0  14   70.81    7.23
  12   0 -14   59.48    6.22
 -12   0  13    1.01    1.99
 -12   0  13    0.76    2.32
  12   0 -13    2.14    2.51
 -12   0  12  290.88   12.25
  12   0 -12  295.47   13.82
 -12   0  11    0.70    2.92
 -12   0  11    1.74    2.46
  12   0 -11    3.46    3.34
  12   0 -10    2.36    1.68
 -12   0  10    1.65    2.14
 -12   0  10    2.55    2.81
  12   0 -10    2.67    2.52
  12   0  -9    0.73    1.77
 -12   0   9    0.71    2.20
 -12   0   9    0.00    2.85
  12   0  -9    0.53    2.39
  12   0  -8  459.15   15.03
 -12   0   8  476.10   19.02
 -12   0   8  532.21   21.80
  12   0  -8  526.45   19.79
  12   0  -7   -0.03    1.43
 -12   0   7    0.62    2.85
 -12   0   7   -0.21    2.00
  12   0  -7    0.21    2.82
  12   0  -6   34.42    3.24
 -12   0   6   35.07    4.75
 -12   0   6   36.12    4.50
  12   0  -5    0.56    1.68
  12   0  -5    0.42    2.35
  12   0  -4   39.67    3.59
 -12   0   4   44.13    5.39
  12   0  -4   48.94    6.18
  12   0  -4   47.94    5.40
 -12   0   3   -0.61    2.90
  12   0  -3    0.10    1.80
  12   0  -2    0.59    1.29
 -12   0   2   -0.12    3.12
  12   0  -2    1.46    2.61
  12   0  -1   -0.65    1.80
 -12   0   1    0.21    2.57
  12   0  -1   -0.40    2.03
  12   0   0   29.71    3.25
 -12   0   0   37.04    5.12
  12   0   0   32.32    4.41
  12   0   1    0.68    1.28
 -12   0  -1   -1.05    2.38
  12   0   1   -0.46    1.90
  12   0   2    1.37    1.77
 -12   0  -2    0.56    2.92
  12   0   2    0.61    2.11
  12   0   2    0.99    2.29
  12   0   3    0.37    1.23
 -12   0  -3    0.06    2.45
  12   0   3    0.13    2.79
  12   0   3    1.19    2.17
  12   0   4  118.60    6.96
 -12   0  -4  105.79    9.46
  12   0   4  111.07    8.76
  12   0   4  102.19    7.78
  12   0   5    0.16    2.78
  12   0   5    0.31    1.69
  12   0   6   87.05    7.02
  12   0   7    0.62    2.88
  12   0   8    1.78    3.00
  12   0   9   -0.22    2.98
  12   0  10  311.77   15.90
  12   0  11    1.44    3.06
  12   0  12   56.33    6.31
  12   0  13    0.83    2.64
  12   0  14    3.74    2.84
  12   0  15   -0.09    2.52
 -12  -2  21   17.30    3.64
  12  -2 -21   23.25    5.26
  12   2 -21   24.02    3.99
 -12  -2  20   36.60    5.05
  12  -2 -20   49.20    5.91
  12   2 -20   38.22    6.35
  12   2 -20   50.35    5.12
 -12  -2  19   31.56    4.72
  12   2 -19   30.47    5.52
 -12  -2  18   11.17    3.24
 -12  -2  18   10.94    2.97
  12  -2 -18   12.92    3.22
  12  -2 -18   13.44    4.13
 -12  -2  17   39.12    5.24
 -12  -2  17   33.79    4.28
  12  -2 -17   42.64    4.78
  12  -2 -17   40.10    5.21
 -12  -2  16  262.41   13.60
 -12  -2  16  225.85   11.82
  12  -2 -16  265.48   14.21
  12  -2 -16  270.68   10.87
  12  -2 -16  270.43   13.12
 -12  -2  15   27.78    4.62
 -12  -2  15   26.56    4.34
  12  -2 -15   31.15    4.04
  12  -2 -15   31.05    3.99
  12  -2 -15   23.81    4.35
 -12  -2  14   69.63    7.02
 -12  -2  14   65.03    5.00
  12  -2 -14   58.85    5.08
  12  -2 -14   64.57    4.93
 -12  -2  13  243.05   14.42
 -12  -2  13  237.27   11.00
  12  -2 -13  204.42   14.05
  12  -2 -13  229.61   10.14
  12  -2 -13  240.63   11.57
 -12  -2  12   11.15    3.18
 -12  -2  12   10.50    3.12
  12  -2 -12   16.02    3.47
 -12  -2  11    2.41    2.08
  12   2 -11    4.16    2.09
 -12   2  11    3.40    3.03
  12  -2 -11    4.77    2.21
 -12  -2  10    0.56    1.93
  12   2 -10    0.50    1.81
 -12   2  10    1.07    2.79
 -12  -2  10   -0.52    2.70
  12  -2 -10    0.24    3.13
  12   2 -10    1.08    2.64
 -12  -2   9   50.32    6.43
  12  -2  -9   45.11    4.01
  12   2  -9   59.30    4.60
 -12   2   9   43.15    4.87
 -12  -2   9   37.34    5.32
 -12   2   9   49.66    5.91
 -12  -2   9   49.28    5.58
  12  -2  -9   50.96    4.97
  12   2  -9   48.82    5.12
 -12  -2   8   30.53    5.34
  12  -2  -8   27.32    3.22
  12   2  -8   32.52    3.64
 -12   2   8   28.34    3.96
 -12  -2   8   23.19    3.55
 -12  -2   8   30.66    3.83
  12  -2  -8   27.44    3.89
  12   2  -8   29.93    4.20
 -12  -2   7  130.74   10.20
  12  -2  -7  121.92    6.41
  12   2  -7  106.07    7.71
 -12   2   7  117.80    7.77
 -12  -2   7  102.15    8.21
 -12  -2   7  122.12    8.40
  12  -2  -7  120.51    8.37
  12   2  -7  123.72    8.97
 -12  -2   6   84.79    8.02
  12  -2  -6   76.14    4.65
  12   2  -6   86.93    5.72
 -12   2   6   81.42    6.22
 -12  -2   6   69.04    6.62
 -12  -2   6   86.13    7.30
  12  -2  -6   82.27    7.14
  12  -2  -6   78.78    6.79
  12   2  -6   83.59    6.47
 -12  -2   5   29.84    5.72
  12  -2  -5   35.44    3.39
  12   2  -5   23.95    2.79
 -12   2   5   30.32    4.54
 -12  -2   5   26.01    4.35
 -12  -2   5   32.84    5.51
  12  -2  -5   33.01    5.09
  12  -2  -5   30.94    3.98
  12   2  -5   35.94    4.08
 -12  -2   4   69.97    6.92
  12  -2  -4   71.71    5.43
 -12   2   4   72.90    6.99
 -12  -2   4   61.63    6.22
 -12  -2   4   71.04    7.56
  12  -2  -4   76.11    7.08
  12  -2  -4   61.32    6.87
  12   2  -4   63.90    5.83
 -12  -2   3    5.20    2.30
  12  -2  -3    5.52    1.80
  12   2  -3    5.06    2.05
 -12   2   3    4.26    2.55
 -12  -2   3    4.23    2.51
 -12  -2   3    4.81    2.54
  12  -2  -3    6.80    2.45
  12  -2  -3    5.05    2.29
  12   2  -3    4.57    2.27
 -12  -2   2   17.09    3.76
  12   2  -2   20.56    3.07
 -12   2   2   16.73    3.37
 -12  -2   2   15.20    3.25
 -12  -2   2   17.10    3.99
  12  -2  -2   20.59    3.74
  12  -2  -2   14.62    3.34
  12   2  -2   18.97    3.10
 -12  -2   1  215.83   13.29
  12  -2  -1  237.84    9.55
  12   2  -1  250.65   10.50
  12   2  -1  207.92   10.20
 -12   2   1  217.26   12.19
 -12  -2   1  229.08   15.81
  12  -2  -1  270.74   13.11
  12  -2  -1  181.12    9.96
  12   2  -1  220.54   10.30
  12  -2   0  343.16   13.27
  12   2   0  318.75   12.26
  12   2   0  297.17   14.61
 -12  -2  -1   18.44    3.68
  12  -2   1   28.40    4.69
  12   2   1   17.30    3.44
  12   2   1   16.52    3.70
  12   2   1   17.46    4.39
  12   2   1   14.16    3.16
 -12  -2  -2  156.95   11.28
  12  -2   2  186.06    8.52
  12   2   2  166.67    7.97
  12   2   2  156.04    9.04
  12   2   2  178.98   11.45
  12   2   2  169.42    8.89
 -12  -2  -3    4.32    2.21
  12  -2   3    6.07    2.14
  12   2   3    5.30    1.92
  12   2   3    4.39    2.64
  12   2   3    5.09    3.73
  12   2   3    4.01    2.15
 -12  -2  -4  221.03   14.00
  12  -2   4  241.47    9.92
  12   2   4  234.54   11.83
  12   2   4  231.08   10.27
 -12  -2  -5   34.36    4.42
  12  -2   5   45.48    5.61
  12   2   5   39.88    5.49
  12   2   5   37.86    4.65
  12   2   6   12.00    3.93
  12   2   6    9.89    2.98
  12   2   7   33.79    4.84
  12   2   7   31.95    4.39
  12   2   8   34.71    4.93
  12   2   8   34.16    4.60
  12   2   9   12.69    4.22
  12   2   9   12.12    3.12
  12   2  10   16.75    3.90
  12   2  10   17.99    3.25
  12  -2  11   33.84    4.65
  12   2  11   42.83    6.09
  12  -2  12   29.68    4.57
  12  -2  13   18.77    3.73
  12  -2  13   20.37    3.86
  12   2  14   72.17    8.24
  12  -2  14   43.25    5.98
 -12  -4  19   65.21    7.23
  12  -4 -19   80.38    9.19
 -12  -4  18   69.22    6.10
 -12  -4  18   65.24    5.49
  12  -4 -18   76.70    6.77
 -12  -4  17   13.91    3.19
 -12  -4  17   15.92    3.03
 -12  -4  17   11.85    3.21
  12  -4 -17   17.06    4.47
 -12  -4  16   47.56    5.82
 -12  -4  16   38.75    5.55
  12  -4 -16   50.14    6.32
 -12  -4  15    1.48    2.42
  12  -4 -15    2.26    2.79
 -12  -4  14    3.70    2.63
  12  -4 -14    5.17    2.90
 -12  -4  13   19.49    3.49
  12  -4 -13   18.66    3.37
  12  -4 -13   24.22    3.52
  12   4 -12    1.89    2.03
 -12  -4  12    0.77    2.17
  12  -4 -12    0.91    1.77
  12  -4 -12    1.94    2.60
  12   4 -11   36.58    3.68
 -12  -4  11   31.40    3.86
  12  -4 -11   39.11    3.99
 -12  -4  10    4.84    2.81
  12   4 -10    5.79    2.33
 -12  -4  10    5.97    2.52
 -12  -4   9   50.85    5.23
  12   4  -9   43.58    3.93
 -12  -4   9   46.07    5.43
  12  -4  -9   42.37    3.79
 -12  -4   8    8.89    3.21
  12  -4  -8    8.24    2.12
  12   4  -8    8.33    2.20
 -12  -4   8    8.52    3.16
  12  -4  -8    6.79    2.23
  12  -4  -8    7.20    2.88
 -12  -4   7    1.65    2.95
  12  -4  -7    0.82    1.84
  12   4  -7    0.86    2.35
  12  -4  -7    0.12    2.30
  12  -4  -7   -0.37    2.42
 -12  -4   6   58.27    5.49
  12  -4  -6   48.12    4.72
  12   4  -6   44.88    4.35
 -12  -4   6   52.37    4.80
  12  -4  -6   50.23    5.27
  12  -4  -6   39.39    4.96
 -12  -4   5   19.20    3.71
  12  -4  -5   18.69    3.12
 -12  -4   5   17.88    3.73
  12  -4  -5   15.47    2.92
  12   4  -5   16.58    4.07
 -12  -4   4   44.93    5.79
  12  -4  -4   45.42    4.08
  12   4  -4   38.51    3.70
 -12  -4   4   37.04    4.29
  12  -4  -4   34.79    3.73
  12   4  -4   40.41    5.66
 -12  -4   3   17.55    3.88
  12  -4  -3   15.46    2.58
  12   4  -3   15.03    2.60
 -12  -4   3   15.57    4.17
  12  -4  -3   12.28    3.01
  12   4  -3   15.32    3.68
 -12  -4   2   57.74    5.73
  12  -4  -2   52.63    4.48
  12   4  -2   52.14    4.53
 -12  -4   2   54.59    6.12
  12  -4  -2   45.51    4.78
  12  -4  -2   38.41    3.83
  12   4  -2   51.47    5.91
 -12  -4   1   87.40    6.77
  12   4  -1   84.29    5.29
 -12  -4   1   78.41    7.35
  12  -4  -1   75.17    6.44
  12   4  -1   87.64    6.83
 -12  -4   0   58.20    5.94
  12  -4   0   61.97    5.33
  12   4   0   57.35    4.68
 -12  -4   0   56.06    6.28
  12  -4   0   54.07    5.17
  12   4   0   59.17    5.83
 -12  -4  -1   14.57    3.95
  12  -4   1   18.72    3.09
  12   4   1   16.48    2.55
 -12  -4  -1   13.24    3.39
  12  -4   1   13.51    2.90
  12   4   1   17.30    3.85
 -12  -4  -2   22.42    3.71
  12  -4   2   21.28    3.07
  12   4   2   21.57    2.97
 -12  -4  -2   20.62    4.38
  12  -4   2   18.11    3.21
  12   4   2   18.94    3.28
 -12  -4  -3   10.29    3.04
  12  -4   3   12.44    3.00
 -12  -4  -3    9.55    3.19
  12  -4   3    9.34    2.51
  12   4   3    9.09    3.34
 -12  -4  -4   11.57    2.97
  12  -4   4   12.87    2.85
 -12  -4  -4    8.85    4.04
  12  -4   4   11.43    2.97
  12   4   4   15.10    3.67
 -12  -4  -5    1.43    1.92
  12  -4   5    1.13    1.96
  12  -4   5    0.89    1.92
 -12  -4  -6    1.14    2.08
  12  -4   6    1.07    1.81
  12  -4   6    0.56    1.65
 -12  -4  -7   53.15    6.28
  12  -4   7   37.01    4.13
  12   4   7   56.66    4.94
 -12  -4  -8   15.01    3.07
  12  -4   8   10.10    2.45
  12   4   8   15.22    3.53
 -12  -4  -9    3.59    2.35
  12   4   9    5.36    2.52
 -12  -4 -10   63.07    8.30
  12   4  10   75.68    8.83
 -12  -4 -11    0.83    2.09
  12   4  11    2.12    2.63
 -12  -4 -12    0.94    2.14
  12   4  12    0.71    2.36
 -12  -6  15   13.66    3.34
 -12  -6  15   14.73    2.78
 -12  -6  14   32.57    5.43
 -12  -6  13   15.81    3.24
  12   6 -13   21.45    3.77
 -12  -6  13   13.87    3.50
 -12  -6  12   22.92    4.25
  12   6 -12   29.41    4.53
 -12  -6  12   20.19    3.96
 -12  -6  11    1.71    2.58
  12   6 -11    2.76    2.46
 -12  -6  11    1.32    2.48
 -12  -6  10   24.76    3.95
  12   6 -10   30.64    4.16
 -12  -6  10   22.67    4.28
 -12  -6   9   24.91    3.56
  12   6  -9   30.64    3.68
 -12  -6   9   27.85    4.23
 -12  -6   8   35.40    4.16
  12   6  -8   36.14    3.86
 -12  -6   8   33.70    4.34
 -12  -6   7    1.02    2.70
  12  -6  -7    1.02    2.27
 -12  -6   7   -0.13    3.04
 -12  -6   6   10.13    2.91
  12  -6  -6    8.95    3.04
 -12  -6   6    9.03    3.52
 -12  -6   5   28.19    3.99
  12  -6  -5   31.06    4.07
  12   6  -5   32.81    3.85
 -12  -6   5   28.02    4.41
 -12  -6   4    6.74    3.07
  12  -6  -4    7.72    2.72
  12   6  -4    6.24    2.33
 -12  -6   3   35.29    4.57
  12  -6  -3   36.24    4.68
  12   6  -3   33.15    3.70
 -12  -6   2   50.93    5.03
  12  -6  -2   58.87    5.32
  12   6  -2   53.26    4.62
 -12  -6   2   54.96    5.48
  12  -6  -1    0.45    2.46
  12   6  -1    1.28    2.26
 -12  -6   1    0.45    3.25
 -12  -6   0   60.87    5.85
  12   6   0   65.40    5.36
 -12  -6   0   65.70    6.41
  12  -6   1   30.57    3.85
  12   6   1   25.64    3.31
 -12  -6  -1   23.73    4.01
  12   6   1   22.58    4.53
 -12  -6  -2    1.92    2.33
  12  -6   2    2.98    2.49
 -12  -6  -2    1.05    3.25
  12   6   2    1.96    2.42
  12  -6   3   10.45    2.92
 -12  -6  -3   11.11    3.55
  12   6   3    8.73    3.24
  12  -6   4    2.63    2.42
 -12  -6  -4    1.10    3.09
  12   6   4    3.53    2.97
  12  -6   5    1.78    1.87
 -12  -6  -5    1.38    2.78
  12   6   5    1.84    2.58
  12  -6   6    3.73    2.23
 -12  -6  -6    4.41    2.91
  12   6   6    4.65    2.81
  12   6   7   51.24    5.60
 -12  -6  -8    6.90    2.39
  12   6   8    7.63    2.98
 -12  -6  -9    2.06    2.55
  13  -1 -21    0.37    2.98
 -13  -1  20   26.15    5.00
  13  -1 -20   34.33    6.21
  13   1 -20   35.11    5.82
  13   1 -20   34.73    4.68
 -13  -1  19  111.19   12.78
  13   1 -19  137.54   13.93
  13  -1 -19  167.58   17.01
  13   1 -19  149.81   14.64
 -13  -1  18    5.58    2.58
  13  -1 -18    7.25    2.73
  13   1 -18    8.28    2.87
 -13  -1  17   16.30    3.64
 -13  -1  17   18.54    3.73
  13  -1 -17   18.56    4.42
  13  -1 -17   19.09    4.66
  13   1 -17   21.25    3.58
 -13  -1  16  435.99   18.10
 -13  -1  16  418.02   16.67
  13  -1 -16  438.42   13.97
  13  -1 -16  497.16   16.93
  13  -1 -16  443.81   19.98
 -13  -1  15    6.16    3.00
 -13  -1  15    6.89    3.15
  13  -1 -15    9.21    3.10
 -13  -1  14    3.09    2.90
 -13   1  14    3.82    2.61
  13  -1 -14    3.22    2.64
  13  -1 -14    3.27    2.39
  13   1 -14    2.95    3.01
 -13  -1  13  336.64   16.69
 -13   1  13  365.06   16.39
 -13  -1  13  346.83   12.06
  13  -1 -13  364.01   14.31
  13   1 -13  328.54   17.00
 -13  -1  12   21.60    4.86
 -13   1  12   26.59    4.45
 -13  -1  12   25.06    4.01
  13  -1 -12   23.74    4.34
  13   1 -12   25.49    4.14
 -13  -1  11  880.37   26.12
  13   1 -11 1071.78   20.79
 -13   1  11  971.00   27.97
 -13  -1  11  992.84   22.05
  13  -1 -11 1015.02   26.16
  13   1 -11 1004.23   27.50
  13  -1 -10  634.58   17.24
 -13   1  10  618.16   24.87
 -13  -1  10  609.62   25.11
  13  -1 -10  676.69   20.31
  13   1 -10  624.32   24.87
 -13  -1   9   36.82    6.44
  13  -1  -9   51.16    4.56
  13   1  -9   51.27    4.57
 -13   1   9   48.61    5.43
 -13  -1   9   48.30    6.92
  13   1  -9   49.11    5.29
  13  -1  -8    0.48    1.48
  13   1  -8    1.28    1.69
 -13  -1   8    0.48    1.96
 -13   1   8    1.25    2.09
 -13  -1   8    0.82    2.29
  13  -1  -8    1.40    3.33
  13   1  -8    2.69    2.45
  13  -1  -7    9.38    2.23
  13   1  -7   11.88    2.43
 -13   1   7    8.43    3.01
 -13  -1   7    8.67    2.73
 -13  -1   7   10.13    3.44
  13  -1  -7   10.07    3.36
  13   1  -7   10.82    2.92
  13  -1  -6  231.18   10.11
  13   1  -6  231.99   10.39
 -13   1   6  220.67   11.54
 -13  -1   6  217.79   13.61
 -13  -1   6  258.16   15.16
  13  -1  -6  241.55   13.10
  13  -1  -6  236.87   11.77
  13   1  -6  254.81   13.39
  13  -1  -5  211.54    9.35
  13   1  -5  234.66    9.07
 -13   1   5  212.64   12.38
 -13  -1   5  206.36   12.20
 -13  -1   5  231.97   14.48
  13  -1  -5  233.35   12.71
  13  -1  -5  221.22   12.61
  13   1  -5  215.06   10.72
  13  -1  -4    1.04    1.38
 -13   1   4    1.14    3.37
 -13  -1   4    0.27    3.03
 -13  -1   4    0.10    2.41
  13  -1  -4    1.50    2.73
  13  -1  -4    0.95    3.04
  13   1  -4    2.06    3.12
  13   1  -3  261.32   10.30
 -13   1   3  235.76   12.77
  13  -1  -3  280.76   13.97
  13  -1  -3  240.33   12.10
  13  -1  -2    2.09    2.00
  13   1  -2    1.96    1.60
 -13   1   2    2.41    2.54
  13  -1  -2    2.06    2.43
  13  -1  -2    1.54    2.82
  13   1  -2    2.30    2.27
  13  -1  -1   39.52    3.85
  13   1  -1   43.64    4.62
 -13   1   1   40.32    5.40
 -13  -1   1   36.06    4.81
  13  -1  -1   48.28    5.18
  13  -1  -1   35.77    5.00
  13   1  -1   43.00    5.15
  13  -1   0    3.68    1.63
  13   1   0    2.70    2.00
 -13   1   0    3.64    3.07
 -13  -1   0    2.63    3.10
  13   1   0    1.92    2.64
  13  -1   0    3.61    2.73
  13  -1   0    2.00    2.43
  13   1   0    2.91    2.85
  13  -1   1    5.94    1.80
  13   1   1    5.48    1.72
 -13   1  -1    5.69    2.66
 -13  -1  -1    4.34    2.52
  13   1   1    4.81    2.90
  13  -1   1    3.88    2.05
  13   1   1    4.48    2.36
  13  -1   2   14.58    2.84
  13   1   2   11.64    1.99
  13   1   2   11.79    3.67
  13  -1   2    9.71    2.66
  13   1   2   11.73    3.16
  13  -1   3   13.26    2.49
  13   1   3   11.34    2.12
  13   1   3   10.56    3.52
  13   1   3   10.63    3.13
  13  -1   4   23.64    3.36
  13   1   4   22.33    4.26
  13   1   4   18.81    3.15
  13   1   5    4.02    3.00
  13   1   5    3.27    2.17
  13   1   6   17.45    3.80
  13   1   6   15.28    2.98
  13   1   7    3.40    3.28
  13  -1   7    3.27    2.49
  13   1   7    2.60    2.64
  13   1   8   44.85    5.91
  13  -1   8   41.54    5.27
  13   1   8   40.25    5.89
  13   1   9   14.55    3.88
  13  -1   9   13.15    3.39
  13   1  10   70.02    7.44
  13  -1  10   65.58    6.90
  13   1  11    1.78    3.28
  13  -1  11    0.36    2.46
  13   1  12    9.81    3.46
  13  -1  12    8.42    2.97
  13   1  13   13.48    3.49
  13  -1  13   13.59    3.40
  13   1  14    2.35    3.01
 -13  -3  19   12.00    3.31
  13  -3 -19   15.66    3.56
  13   3 -19   11.89    3.67
  13   3 -19   14.55    3.36
 -13  -3  18   81.54    7.02
 -13  -3  18   64.48    6.38
  13  -3 -18   89.45    9.31
 -13  -3  17    5.40    2.54
 -13  -3  17    5.30    2.63
  13  -3 -17    6.12    2.91
 -13  -3  16   58.87    6.27
 -13  -3  16   51.37    4.94
  13  -3 -16   56.55    5.72
 -13  -3  15   79.73    6.76
 -13  -3  15   69.01    5.92
  13  -3 -15   79.52    8.15
  13  -3 -15   80.83    5.94
 -13  -3  14  244.89   12.50
 -13  -3  14  225.29   10.50
  13  -3 -14  185.08   12.59
  13  -3 -14  265.82   11.28
 -13  -3  13  145.38   10.42
 -13  -3  13  138.84    9.31
  13  -3 -13  122.95   10.94
  13  -3 -13  169.02   10.21
 -13  -3  12   53.69    5.60
  13   3 -12   48.56    4.16
 -13  -3  12   51.30    5.06
  13  -3 -12   42.08    5.11
  13  -3 -12   56.69    5.67
 -13  -3  11   32.53    4.84
  13   3 -11   37.00    3.95
 -13  -3  11   30.56    4.11
  13  -3 -11   25.80    4.65
  13  -3 -11   38.14    4.39
  13  -3 -11   32.34    4.31
 -13  -3  10  228.38   11.58
  13   3 -10  260.03    8.95
  13  -3 -10  211.47   10.65
 -13  -3   9    6.70    3.04
  13  -3  -9    7.39    3.15
  13   3  -9    6.10    2.51
 -13  -3   9    6.96    2.97
  13  -3  -9   10.29    3.16
  13  -3  -9    9.95    3.64
 -13  -3   8  479.28   20.53
  13  -3  -8  448.58   18.62
  13   3  -8  476.95   16.15
 -13  -3   8  437.68   17.59
  13  -3  -8  432.20   15.43
  13  -3  -8  392.32   16.84
  13   3  -8  443.51   21.87
 -13  -3   7  186.15   10.35
  13  -3  -7  176.35    8.20
  13   3  -7  182.92    8.66
 -13  -3   7  163.67    9.75
  13  -3  -7  162.37    8.89
  13  -3  -7  158.98   10.73
  13   3  -7  167.04   11.73
 -13  -3   6  348.98   16.88
  13  -3  -6  354.30   10.79
  13   3  -6  381.47   10.94
 -13  -3   6  327.26   14.15
  13  -3  -6  291.06   12.61
  13  -3  -6  299.02   14.27
  13   3  -6  356.29   16.33
 -13  -3   5  197.05   12.74
  13  -3  -5  202.43    9.78
 -13  -3   5  176.78   10.51
  13  -3  -5  187.28    7.71
  13  -3  -5  158.92   12.23
  13   3  -5  200.47   10.33
 -13  -3   4   83.16    7.36
  13  -3  -4   66.57    4.99
  13   3  -4   73.85    5.66
 -13  -3   4   71.10    6.77
  13  -3  -4   60.34    5.79
  13  -3  -4   58.39    7.32
  13   3  -4   66.44    6.25
 -13  -3   3   58.97    6.34
  13  -3  -3   67.38    4.65
  13   3  -3   69.66    4.74
 -13  -3   3   52.41    6.46
  13  -3  -3   55.31    4.26
  13   3  -3   62.22    5.63
 -13  -3   2  548.23   20.44
  13   3  -2  490.15   16.94
 -13  -3   2  506.14   20.65
  13  -3  -2  503.01   15.78
  13   3  -2  523.46   15.46
 -13  -3   1   38.97    7.19
  13  -3  -1   40.03    5.08
  13   3  -1   38.02    5.57
 -13  -3   1   31.98    4.96
  13  -3  -1   41.88    5.82
  13   3  -1   31.48    4.86
 -13  -3   0  317.30   16.21
  13  -3   0  391.18   13.35
  13   3   0  308.58   13.04
 -13  -3   0  270.07   16.60
  13  -3   0  374.98   14.85
  13   3   0  339.42   12.71
 -13  -3  -1  106.32    8.74
  13  -3   1  131.34    9.13
  13   3   1  119.89    8.64
  13  -3   1  131.37    8.74
  13   3   1   95.21    7.20
 -13  -3  -2   38.90    4.87
  13  -3   2   50.30    5.43
  13   3   2   42.76    4.26
  13  -3   2   50.52    6.13
 -13  -3  -3   15.04    3.07
  13  -3   3   14.31    3.12
  13  -3   3   16.63    3.74
 -13  -3  -4    0.18    2.45
  13  -3   4    0.82    1.66
  13   3   4    1.08    2.79
  13  -3   4    0.95    2.72
  13   3   4    1.35    2.95
 -13  -3  -5  225.81   14.22
  13  -3   5  229.37    9.58
  13   3   5  215.24   10.87
  13  -3   5  223.48    9.89
  13   3   5  240.37    9.92
 -13  -3  -6  115.51    9.96
  13  -3   6  111.25    7.02
  13   3   6  101.61    7.57
  13  -3   6  120.29    8.72
  13   3   6  122.65    9.22
 -13  -3  -7  180.50   11.65
  13  -3   7  175.76    9.58
  13   3   7  208.38   11.54
 -13  -3  -8    4.66    2.33
  13  -3   8    5.21    2.45
  13   3   8    5.30    2.97
 -13  -3  -9   47.97    6.47
  13  -3   9   45.43    4.93
  13   3   9   47.21    5.46
  13   3  10   36.63    5.85
  13  -3  10   40.06    5.55
  13   3  10   43.19    6.65
  13  -3  11    0.52    1.94
  13   3  11   -0.24    2.55
 -13  -5  16    0.67    2.41
 -13  -5  16    0.94    1.97
 -13  -5  15   58.16    6.34
 -13  -5  15   45.30    6.13
 -13  -5  14   93.60   10.17
 -13  -5  14   71.82    8.46
 -13  -5  13    1.78    2.54
  13   5 -13    2.30    2.18
 -13  -5  13    1.47    2.57
 -13  -5  12   65.43    7.99
  13   5 -12   80.98    7.77
 -13  -5  12   58.44    7.01
 -13  -5  11   34.28    4.81
  13   5 -11   40.56    4.17
 -13  -5  11   30.96    4.44
  13   5 -10    4.97    2.51
 -13  -5  10    3.58    2.97
  13   5  -9   81.42    5.36
 -13  -5   9   73.29    6.18
  13  -5  -8    7.19    3.24
  13   5  -8    6.13    2.60
 -13  -5   8    7.48    3.36
  13  -5  -7  144.61    9.19
  13   5  -7  162.38    6.95
  13  -5  -6   53.52    5.58
 -13  -5   5    7.04    2.61
  13  -5  -5    8.39    2.63
  13   5  -5    9.41    2.51
 -13  -5   5    6.10    3.50
 -13  -5   4   29.69    5.15
  13  -5  -4   24.41    3.46
  13   5  -4   29.22    3.80
 -13  -5   4   27.73    4.68
 -13  -5   3  179.81   11.91
  13  -5  -3  157.41    8.85
  13   5  -3  194.51    9.93
 -13  -5   3  162.61   11.14
  13   5  -3  175.11   13.57
 -13  -5   2  128.64    9.16
  13  -5  -2  114.65    7.62
  13   5  -2  109.30    8.02
 -13  -5   2  129.59    9.58
  13   5  -2  104.24   11.15
 -13  -5   1   78.23    7.11
  13   5  -1   78.02    6.83
 -13  -5   1   76.89    7.60
  13   5  -1   74.71    8.98
 -13  -5   0   32.65    5.49
  13  -5   0   31.48    3.64
  13   5   0   37.07    3.90
 -13  -5   0   30.21    5.51
  13   5   0   29.93    4.69
 -13  -5  -1   47.84    7.72
  13  -5   1   58.45    5.08
  13   5   1   56.26    4.56
 -13  -5  -1   51.12    7.41
  13   5   1   46.66    5.54
 -13  -5  -2   89.08    7.04
  13  -5   2   92.87    6.95
 -13  -5  -2   87.27    9.25
  13   5   2   90.17    7.20
 -13  -5  -3   28.79    4.01
  13  -5   3   34.04    3.70
 -13  -5  -3   29.07    5.91
  13   5   3   31.76    4.66
 -13  -5  -4   -0.10    2.42
  13  -5   4    0.40    2.12
 -13  -5  -4    0.76    2.82
  13   5   4    0.16    2.94
 -13  -5  -5    0.22    1.97
  13  -5   5    1.44    2.08
  13   5   5    0.91    2.88
 -13  -5  -6   -0.03    2.32
  13  -5   6    0.31    1.99
  13   5   6   -0.16    2.85
 -13  -5  -7   19.85    3.98
  13   5   7   22.15    3.73
 -13  -5  -8   14.89    3.59
 -13  -5  -9    1.60    2.27
  13   5   9    0.89    2.61
 -13  -7   9   28.00    4.62
  13   7  -9   36.52    5.11
 -13  -7   9   26.43    4.66
 -13  -7   8   38.56    5.58
  13   7  -8   52.65    5.81
 -13  -7   8   36.20    5.36
 -13  -7   7    0.85    2.08
 -13  -7   7    1.31    2.39
 -13  -7   6    5.18    2.35
  13   7  -6    5.72    2.46
 -13  -7   6    4.66    2.51
 -13  -7   5   23.74    4.13
  13  -7  -5   28.21    4.91
  13   7  -5   31.85    4.69
 -13  -7   5   25.09    4.26
 -13  -7   4   68.99    6.09
  13  -7  -4   71.98    6.93
  13   7  -4   84.94    6.86
 -13  -7   4   66.29    6.55
 -13  -7   3    8.88    4.22
  13  -7  -3   11.42    2.92
  13   7  -3   12.50    2.78
 -13  -7   2    3.47    2.55
  13  -7  -2    4.57    2.43
  13   7  -2    4.47    2.29
 -13  -7   1   16.87    3.99
  13  -7  -1   20.93    3.67
  13   7  -1   21.48    3.96
 -13  -7   1   16.32    3.40
 -13  -7   0   40.47    5.23
  13  -7   0   47.94    5.42
 -13  -7   0   37.95    5.69
 -13  -7  -1   19.06    5.03
 -13  -7  -1   19.42    4.25
 -13  -7  -2   85.03    8.69
  13  -7   2  104.20   10.24
 -13  -7  -2   80.81    9.62
 -13  -7  -3    3.28    2.97
  13  -7   3    5.45    2.72
  14   0 -20   -0.07    2.73
  14   0 -19    0.53    2.60
  14   0 -17    0.03    2.12
 -14   0  16    1.26    2.54
  14   0 -16    0.77    2.24
 -14   0  15    0.15    2.97
 -14   0  14    4.13    3.49
  14   0 -14    3.21    3.12
 -14   0  13   -0.16    3.18
  14   0 -13    0.03    3.07
 -14   0  12  491.19   15.92
  14   0 -12  508.65   18.16
  14   0 -11    1.62    1.97
 -14   0  11    0.92    3.27
  14   0 -11    2.12    2.84
  14   0 -10   21.17    3.03
 -14   0  10   19.00    3.68
  14   0 -10   18.62    3.76
  14   0  -9    1.02    1.75
 -14   0   9    0.70    2.27
  14   0  -9    1.92    3.10
  14   0  -8   33.87    4.04
 -14   0   8   33.29    5.15
  14   0  -8   39.67    5.42
  14   0  -7    0.58    1.65
 -14   0   7    1.19    2.82
  14   0  -6   44.13    4.44
  14   0  -5    0.28    1.44
  14   0  -5   -0.48    2.42
  14   0  -5   -1.35    2.92
  14   0  -4  106.44    8.58
  14   0  -4  108.01    9.00
  14   0  -3    0.37    1.78
  14   0  -3    0.79    2.36
  14   0  -3   -0.12    2.42
  14   0  -2  102.24    6.04
  14   0  -2  104.32    8.92
  14   0  -2   84.23    8.28
  14   0  -1   -0.36    2.51
  14   0  -1    0.77    2.29
  14   0   0   -0.15    1.63
  14   0   0   -0.07    2.57
  14   0   0    0.00    2.69
  14   0   1    0.19    1.86
  14   0   1   -0.04    2.08
  14   0   2   18.25    2.78
  14   0   2   15.59    3.56
  14   0   3    0.00    1.74
  14   0   3    0.36    2.35
  14   0   3   -0.04    2.55
  14   0   4   14.28    2.60
  14   0   4   12.01    3.33
  14   0   4    9.96    2.97
  14   0   5   -0.21    2.15
  14   0   6    0.97    2.55
  14   0   7    1.11    3.10
  14   0   8  174.72   11.63
  14   0   9    1.19    2.64
  14   0  10   50.52    6.79
  14   0  11   -0.34    2.67
  14   0  12   14.49    3.64
 -14  -2  19    3.28    2.54
  14  -2 -19    5.09    2.97
  14   2 -19    3.58    2.66
 -14  -2  18   80.35    8.11
  14  -2 -18  109.23    8.98
  14   2 -18   90.66    7.63
 -14  -2  17   -0.13    2.48
 -14  -2  17    0.79    2.52
  14   2 -17    0.27    2.09
 -14  -2  16   57.15    6.81
 -14  -2  16   53.72    5.61
  14  -2 -16   69.07    7.01
  14  -2 -16   64.45    5.78
 -14  -2  15    6.55    3.12
 -14  -2  15    6.15    3.04
  14  -2 -15    8.27    2.67
  14  -2 -15   11.09    2.97
 -14  -2  14   64.42    7.36
  14  -2 -14   71.27    8.06
  14  -2 -14   80.98    6.46
 -14  -2  13    1.04    2.29
  14  -2 -13    1.41    2.32
  14  -2 -13    2.48    2.60
  14  -2 -13    0.77    2.67
 -14  -2  12  181.36   11.27
  14   2 -12  214.82    8.95
 -14  -2  12  190.71    9.58
  14  -2 -12  157.26   10.84
  14  -2 -12  217.84    9.58
  14   2 -12  189.18   15.29
 -14  -2  11   52.57    6.31
  14   2 -11   59.85    4.71
 -14  -2  11   58.60    5.40
  14  -2 -11   38.44    5.73
  14  -2 -11   59.27    5.61
  14  -2 -11   57.95    6.52
  14   2 -11   54.30    8.34
 -14  -2  10    2.41    2.17
  14   2 -10    3.21    2.08
 -14  -2  10    2.94    2.98
  14  -2 -10    5.02    2.87
  14   2 -10    3.64    3.34
 -14  -2   9   28.80    5.09
  14  -2  -9   40.44    4.65
  14   2  -9   30.07    3.39
 -14  -2   9   30.99    4.26
  14  -2  -9   36.46    4.13
  14  -2  -9   34.15    4.66
  14   2  -9   33.88    5.27
 -14  -2   8   89.60    7.84
  14  -2  -8   89.20    5.85
  14   2  -8   89.42    6.86
 -14  -2   8   96.76    7.74
  14  -2  -8   95.44    7.48
  14   2  -8   88.47    7.60
 -14  -2   7  104.14    9.47
  14  -2  -7  114.20    6.28
  14   2  -7  143.84    7.50
 -14  -2   7  110.89    9.59
  14  -2  -7  117.87    9.47
  14   2  -7  125.18    8.43
 -14  -2   6   54.73    7.07
  14  -2  -6   58.93    5.58
  14   2  -6   68.25    4.72
 -14  -2   6   56.29    5.83
  14  -2  -6   61.44    6.76
  14   2  -6   64.08    5.86
 -14  -2   5   23.40    4.14
  14  -2  -5   25.66    3.28
 -14  -2   5   22.98    3.61
  14  -2  -5   24.88    3.58
  14  -2  -5   22.61    5.32
  14   2  -5   23.19    3.61
 -14  -2   4   79.57    7.74
  14  -2  -4   79.00    5.63
  14   2  -4   84.09    5.09
 -14  -2   4   76.48    8.54
  14  -2  -4   87.46    7.65
  14  -2  -4   74.67    7.65
  14   2  -4   77.22    6.16
 -14  -2   3    7.45    3.24
  14   2  -3   10.11    2.45
 -14  -2   3    7.79    2.57
  14  -2  -3   11.09    3.43
  14  -2  -3    7.14    2.21
  14  -2  -3    7.50    3.27
  14   2  -3    9.90    2.87
  14  -2  -2    8.11    2.02
  14   2  -2   10.91    2.61
  14  -2  -2   10.02    3.52
  14  -2  -2    6.96    2.52
  14   2  -2    9.18    3.34
  14  -2  -1   29.99    3.24
  14   2  -1   30.32    3.31
  14  -2  -1   31.16    3.98
  14  -2  -1   22.00    4.60
  14  -2   0   17.33    2.73
  14   2   0   19.41    2.82
  14  -2   0   24.59    4.31
  14  -2   1    3.01    1.89
  14   2   1    3.41    1.86
  14   2   1    2.98    2.26
  14  -2   2   29.84    3.52
  14   2   2   28.98    3.24
  14   2   2   25.61    3.76
  14  -2   3   26.38    3.61
  14   2   3   21.23    2.81
  14   2   3   20.93    3.73
  14  -2   3   28.34    4.45
  14   2   3   20.74    3.33
  14  -2   4   62.25    5.97
  14   2   4   53.38    5.58
  14  -2   4   68.91    6.10
  14   2   4   56.73    6.03
  14  -2   5   11.03    2.39
  14   2   5    8.54    3.53
  14  -2   5   11.34    3.43
  14   2   5   11.37    3.67
  14   2   6    0.62    2.48
  14  -2   6    1.81    2.81
  14   2   6    0.37    2.09
  14   2   7   15.16    3.95
  14  -2   7   18.44    3.50
  14   2   7   15.35    3.50
  14   2   8    5.24    3.46
  14  -2   8    5.86    2.41
  14   2   8    5.11    2.61
  14   2   9    0.30    3.10
  14  -2   9    0.62    2.08
  14   2   9    1.22    2.35
  14   2  10   17.04    3.95
  14  -2  10   20.00    3.44
  14  -2  11    5.76    2.45
 -14  -4  17   10.29    3.07
 -14  -4  16   40.76    5.29
 -14  -4  16   40.58    5.43
 -14  -4  16   34.01    5.00
  14  -4 -16   43.50    6.12
 -14  -4  15    3.98    2.67
 -14  -4  15    2.92    2.70
 -14  -4  14    4.78    2.97
 -14  -4  14    3.39    2.52
 -14  -4  13   18.08    3.34
  14   4 -13   19.38    3.15
 -14  -4  13   17.55    3.30
 -14  -4  12   57.49    5.97
  14   4 -12   59.83    4.80
 -14  -4  12   47.63    4.57
  14  -4 -12   62.06    5.57
 -14  -4  11    7.41    3.00
  14   4 -11    7.45    2.43
 -14  -4  11    8.58    3.25
 -14  -4  10   31.64    4.50
  14   4 -10   32.66    3.27
  14  -4 -10   33.69    3.74
 -14  -4   9    9.07    2.92
  14   4  -9    7.13    2.61
  14  -4  -9    7.42    2.73
 -14  -4   8   -0.13    2.84
  14  -4  -8    0.79    2.02
  14   4  -8    0.58    2.27
 -14  -4   8    0.40    2.33
  14  -4  -8    0.74    2.02
 -14  -4   7   81.07    7.45
  14  -4  -7   78.07    6.22
  14   4  -7   83.05    5.98
 -14  -4   7   70.45    6.47
  14  -4  -7   63.29    5.29
  14  -4  -7   50.01    5.42
 -14  -4   6    6.21    3.31
  14  -4  -6    6.49    2.49
 -14  -4   6    4.53    2.63
  14  -4  -6    4.56    2.20
  14  -4  -6    4.08    2.41
  14   4  -6    5.49    3.46
 -14  -4   5    3.77    3.19
  14  -4  -5    3.15    1.77
  14   4  -5    4.80    2.63
 -14  -4   5    4.66    3.18
  14  -4  -5    3.00    1.74
  14   4  -5    4.69    3.49
 -14  -4   4   11.58    3.58
  14  -4  -4   10.66    2.66
  14   4  -4   11.67    2.73
 -14  -4   4   10.20    2.87
  14  -4  -4    6.86    2.15
  14   4  -4    9.81    3.43
 -14  -4   3  109.36    9.83
  14  -4  -3   94.69    5.26
  14   4  -3  115.51    6.49
 -14  -4   3   90.92    8.69
  14   4  -3  100.37    8.94
 -14  -4   2  226.92   15.96
  14  -4  -2  216.63   10.94
  14   4  -2  199.53   11.97
 -14  -4   2  183.54   12.66
  14   4  -2  212.95   13.67
 -14  -4   1  225.81   17.34
  14   4  -1  253.84   11.83
 -14  -4   1  167.68   11.58
  14  -4  -1  178.22   12.35
  14   4  -1  213.17   11.77
 -14  -4   0  130.85   11.43
  14  -4   0  125.52    7.16
  14   4   0  113.86    7.96
 -14  -4   0   97.20   10.08
  14  -4   0  104.72    9.50
  14   4   0  115.51    8.48
  14  -4   1    6.53    3.52
  14   4   1    4.60    2.26
  14  -4   1    4.51    2.57
  14   4   1    3.19    3.40
 -14  -4  -2   52.81    6.74
  14  -4   2   64.29    4.59
  14  -4   2   44.65    5.09
  14   4   2   59.91    5.40
 -14  -4  -3    2.70    2.29
  14  -4   3    2.36    1.94
  14  -4   3    1.97    1.99
  14   4   3    2.78    2.95
 -14  -4  -4   11.58    3.15
  14  -4   4   10.48    2.42
  14  -4   4    8.64    2.69
  14   4   4   10.13    3.62
 -14  -4  -5  135.93   11.40
  14  -4   5  112.14    6.86
  14  -4   5   86.22    6.70
 -14  -4  -6    1.29    2.87
  14  -4   6    1.69    2.20
  14   4   6    0.88    3.07
 -14  -4  -7  496.49   21.08
  14   4   7  513.31   17.98
 -14  -4  -8    4.48    2.73
  14  -4   8    4.14    2.70
  14   4   8    4.37    2.95
  14   4   9   86.34   10.20
 -14  -6  12   27.79    4.66
 -14  -6  12   24.87    4.47
 -14  -6  11   18.62    3.62
  14   6 -11   23.15    3.98
 -14  -6  11   16.15    3.67
 -14  -6  10    4.69    2.63
  14   6 -10    6.95    2.58
 -14  -6  10    5.05    2.69
 -14  -6   9   15.13    3.36
  14   6  -9   21.25    3.16
 -14  -6   9   13.99    3.28
 -14  -6   8    0.76    2.57
  14   6  -8    0.79    2.45
 -14  -6   8    0.86    2.70
 -14  -6   7    3.73    2.57
 -14  -6   7    3.74    2.98
 -14  -6   6    2.64    2.36
  14  -6  -6    3.01    2.27
  14   6  -6    3.89    2.60
  14  -6  -5    7.42    2.57
  14   6  -5    8.43    2.95
 -14  -6   5    5.70    3.16
  14  -6  -4   46.89    5.92
  14   6  -4   54.21    6.73
 -14  -6   4   47.26    6.59
  14  -6  -3    2.00    2.27
  14   6  -3    2.51    2.35
 -14  -6   3    1.17    2.48
  14  -6  -2   48.12    5.81
  14   6  -2   53.14    6.03
 -14  -6   2   42.54    6.52
  14  -6  -1    0.89    2.30
  14   6  -1    1.10    1.99
 -14  -6   1   -0.18    2.92
 -14  -6   0   33.50    4.65
  14   6   0   37.52    4.13
 -14  -6   0   30.60    5.33
 -14  -6  -1    0.43    2.39
  14  -6   1    1.28    2.20
 -14  -6  -1    1.60    2.73
  14   6   1    1.78    2.64
 -14  -6  -2    3.64    2.54
  14  -6   2    5.09    2.51
 -14  -6  -2    3.71    2.78
  14   6   2    3.68    2.67
 -14  -6  -3   30.12    5.27
  14  -6   3   34.85    4.74
 -14  -6  -3   28.39    5.76
  14   6   3   30.79    5.72
 -14  -6  -4    5.60    2.60
  14  -6   4    6.61    2.46
  14   6   4    5.94    3.04
 -14  -6  -5   14.79    3.89
  15  -1 -19    6.46    3.19
  15   1 -19    5.51    3.06
  15  -1 -18    1.78    2.81
  15   1 -18    1.34    2.55
  15  -1 -17   68.06    7.53
  15  -1 -17   65.06    7.42
  15  -1 -16    8.63    3.16
  15  -1 -16    9.06    2.64
  15   1 -16    8.73    2.73
 -15  -1  15   19.45    3.31
  15  -1 -15   17.24    4.75
  15  -1 -15   22.75    3.58
 -15  -1  14    1.01    3.09
  15  -1 -14    0.15    2.73
  15  -1 -14    1.13    2.72
  15  -1 -14   -0.03    2.90
  15   1 -14    1.28    3.04
 -15  -1  13   18.63    3.68
  15  -1 -13   22.09    4.41
  15  -1 -13   15.81    3.93
  15   1 -13   18.17    4.75
 -15   1  12   21.51    3.62
 -15  -1  12   21.04    4.25
  15  -1 -12   20.95    4.53
  15   1 -12   23.03    5.12
  15   1 -11   21.38    3.24
 -15   1  11   19.02    3.67
 -15  -1  11   20.96    3.44
  15  -1 -11   19.88    4.50
  15   1 -11   20.07    4.11
  15  -1 -10   35.48    4.45
  15   1 -10   34.58    3.67
 -15   1  10   32.77    4.99
 -15  -1  10   34.24    4.42
  15   1 -10   31.36    4.94
  15  -1  -9   10.04    2.70
  15   1  -9   11.19    2.82
 -15  -1   9    8.06    3.07
  15   1  -9    8.49    3.18
  15  -1  -8   18.37    3.88
  15   1  -8   22.32    3.39
 -15  -1   8   15.05    3.93
  15  -1  -8   20.47    5.17
  15   1  -8   20.79    4.35
  15  -1  -7    6.56    2.29
  15   1  -7    6.24    1.99
 -15  -1   7    6.53    2.95
  15  -1  -7    6.81    3.43
  15   1  -7    6.00    2.82
  15  -1  -6   14.51    2.39
  15   1  -6   14.65    2.45
 -15  -1   6   14.73    2.85
  15  -1  -6   18.16    4.45
  15   1  -6   14.22    3.85
  15  -1  -5   16.26    2.41
  15   1  -5   16.79    2.76
  15  -1  -5   17.68    3.52
  15  -1  -5   17.65    3.70
  15   1  -5   15.53    3.34
  15  -1  -4    8.36    2.39
  15  -1  -4    8.91    2.92
  15  -1  -4    8.31    3.06
  15   1  -3   10.70    2.57
  15  -1  -3    9.37    3.15
  15  -1  -3    8.91    3.01
  15   1  -3    7.82    2.72
  15  -1  -2  129.41    7.88
  15   1  -2  123.23    7.30
  15  -1  -2  135.87    9.01
  15  -1  -2  118.94   10.19
  15   1  -2  127.79    8.73
  15  -1  -1   13.88    2.36
  15   1  -1   14.97    2.64
  15  -1  -1   12.95    3.24
  15   1  -1   14.80    3.41
  15  -1  -1   11.92    2.92
  15   1  -1   12.20    2.97
  15  -1   0   17.61    2.85
  15   1   0   14.59    2.32
  15  -1   0   16.88    3.58
  15   1   0   16.33    3.41
  15  -1   0   11.30    2.78
  15   1   0   12.29    3.49
  15  -1   1    1.74    1.71
  15   1   1    1.93    2.09
  15  -1   1    2.36    3.01
  15   1   1    1.71    2.87
  15  -1   1    1.48    2.17
  15   1   1    2.73    2.61
  15  -1   2   42.58    4.91
  15   1   2   40.86    4.26
  15  -1   2   42.89    4.88
  15  -1   2   24.39    3.93
  15   1   2   35.17    5.39
  15  -1   3    3.55    1.74
  15   1   3    2.52    1.81
  15  -1   3    3.10    3.01
  15   1   3    2.32    2.26
  15  -1   4   38.11    4.42
  15  -1   4   43.61    4.90
  15   1   4   28.95    4.51
  15   1   5   15.47    3.68
  15  -1   5   22.27    3.50
  15   1   5   17.73    3.95
  15   1   6   17.80    4.23
  15   1   6   16.93    3.79
  15   1   7    3.95    3.21
  15   1   7    4.26    2.72
  15   1   8    0.82    2.43
  15  -1   8    0.22    2.82
  15   1   9    0.16    2.69
  15  -1   9   -0.16    2.72
  15  -1  10    7.79    2.90
  15  -1  11    0.00    2.58
  15   1  11   -0.27    2.92
 -15  -3  17    7.74    3.12
 -15  -3  17    6.67    2.64
  15  -3 -17    8.52    3.59
 -15  -3  16    7.30    2.84
 -15  -3  16    6.81    2.75
  15  -3 -16    8.82    3.04
 -15  -3  15   62.34    7.94
 -15  -3  15   53.00    7.04
  15  -3 -15   63.52    8.03
 -15  -3  14    0.33    2.41
 -15  -3  14    0.62    2.75
  15  -3 -14    0.91    2.38
  15  -3 -14    0.80    2.11
 -15  -3  13   63.34    6.99
  15  -3 -13   81.08    7.45
 -15  -3  12   10.07    3.12
  15   3 -12    9.47    2.20
  15  -3 -12   11.28    2.90
 -15  -3  11  141.49   10.84
  15   3 -11  178.63    8.06
 -15  -3  11  143.59    8.74
 -15  -3  10    1.17    2.21
  15   3 -10   -0.24    2.06
 -15  -3  10    0.70    2.14
  15  -3 -10    0.19    1.90
  15  -3 -10    0.80    2.58
 -15  -3   9   10.45    2.90
  15  -3  -9   11.33    2.66
  15   3  -9   13.63    2.76
 -15  -3   9   10.39    3.13
  15  -3  -9   10.41    2.30
  15  -3  -9   10.81    3.64
  15   3  -9   11.92    4.11
 -15  -3   8   12.89    2.81
  15  -3  -8   13.85    2.70
  15   3  -8   17.22    3.10
 -15  -3   8   14.52    3.41
  15  -3  -8   14.16    2.76
  15  -3  -8   12.69    3.39
  15   3  -8   14.06    3.62
 -15  -3   7   17.85    3.85
  15  -3  -7   18.65    2.81
  15   3  -7   21.71    3.07
 -15  -3   7   16.84    3.64
  15  -3  -7   16.17    3.06
  15  -3  -7   15.84    3.96
  15   3  -7   18.35    3.80
 -15  -3   6    1.32    2.51
  15  -3  -6    2.66    2.00
 -15  -3   6    1.62    2.70
  15  -3  -6    2.69    2.12
  15  -3  -6    1.69    2.63
  15   3  -6    3.33    3.06
 -15  -3   5   15.63    3.47
  15  -3  -5   14.21    2.57
  15   3  -5   17.12    3.13
 -15  -3   5   15.20    3.37
  15  -3  -5   12.49    2.58
  15  -3  -5   14.19    3.70
  15   3  -5   14.02    3.40
 -15  -3   4    3.58    2.76
  15  -3  -4    4.53    1.89
  15   3  -4    5.43    2.46
 -15  -3   4    2.51    2.52
  15  -3  -4    3.28    2.02
  15  -3  -4    2.82    2.54
  15   3  -4    3.55    3.37
  15  -3  -3    8.76    2.51
  15   3  -3    9.26    2.70
 -15  -3   3    5.34    2.88
  15  -3  -3    6.84    3.46
  15   3  -3    7.90    3.21
 -15  -3   2  201.61   13.67
  15   3  -2  203.35   11.57
 -15  -3   2  161.08   12.75
  15   3  -2  206.09   12.37
  15  -3  -1    1.92    2.48
  15   3  -1    1.44    1.78
  15   3  -1    1.87    3.28
 -15  -3   0    1.90    2.27
  15  -3   0    2.70    1.83
  15   3   0    3.41    2.21
  15  -3   0    1.72    2.82
  15   3   0    3.24    2.58
 -15  -3  -1    7.66    3.31
  15  -3   1    7.35    2.11
  15   3   1    5.92    2.05
  15  -3   1    7.69    3.49
 -15  -3  -2   29.00    4.74
  15  -3   2   31.95    3.85
  15   3   2   31.58    3.49
  15  -3   2   32.00    4.74
  15  -3   3   94.04    6.06
  15  -3   3  100.54    7.66
  15   3   3   96.14    7.33
  15  -3   4   17.21    3.85
  15  -3   4   17.76    4.81
  15   3   4   15.25    3.79
  15  -3   5    3.18    1.77
  15  -3   5    3.09    2.73
  15   3   5    3.71    2.75
  15  -3   6    0.50    2.29
  15   3   6    0.53    2.85
  15  -3   7    2.12    2.27
  15   3   7    2.64    2.72
  15  -3   8    2.60    2.12
  15   3   8    3.40    2.79
  15  -3   9    1.47    2.15
  15   3   9    1.56    2.60
 -15  -5  14    1.23    3.10
 -15  -5  13   23.98    4.44
 -15  -5  13   20.89    4.28
 -15  -5  12   26.00    4.74
  15   5 -12   30.75    4.31
 -15  -5  12   22.75    4.77
 -15  -5  11    1.22    2.70
  15   5 -11    0.77    2.14
 -15  -5  11    0.99    2.72
 -15  -5  10    1.26    2.61
  15   5 -10    1.51    2.42
 -15  -5  10    1.14    2.55
 -15  -5   9    0.07    2.48
  15   5  -9    0.16    2.14
 -15  -5   8    7.87    3.01
  15   5  -8    7.53    2.54
 -15  -5   8    6.65    2.75
 -15  -5   7    2.20    2.54
  15  -5  -7    2.12    2.02
 -15  -5   7    2.63    3.09
 -15  -5   6   28.67    4.65
  15  -5  -6   29.75    4.08
  15   5  -6   36.98    4.39
 -15  -5   6   25.55    4.80
 -15  -5   5   17.79    3.82
  15  -5  -5   19.48    3.09
  15   5  -5   21.63    3.44
 -15  -5   5   17.97    3.92
 -15  -5   4    6.25    3.88
  15  -5  -4    5.00    2.06
  15   5  -4    6.87    2.35
 -15  -5   4    6.96    3.44
 -15  -5   3   85.34    9.00
  15  -5  -3   75.10    7.11
  15   5  -3   93.45    8.17
 -15  -5   3   70.60    8.74
  15   5  -3   70.35    9.41
 -15  -5   2   11.76    4.17
  15  -5  -2   11.80    2.60
  15   5  -2   13.35    2.81
 -15  -5   2    9.10    3.43
  15   5  -2   11.00    3.50
 -15  -5   1   10.75    3.56
  15   5  -1   16.76    3.00
 -15  -5   1   11.79    4.08
  15   5  -1   12.81    4.41
  15  -5   0    1.93    2.05
  15   5   0    1.01    1.97
 -15  -5   0    0.91    2.95
  15   5   0    1.57    2.97
 -15  -5  -1   41.36    6.74
  15  -5   1   45.68    5.30
 -15  -5  -1   34.19    6.09
  15   5   1   40.50    6.10
 -15  -5  -2    4.81    2.84
  15  -5   2    4.01    2.18
  15   5   2    3.98    3.03
 -15  -5  -3   13.70    3.37
  15  -5   3   14.27    2.75
  15   5   3   12.63    3.44
 -15  -5  -4    4.13    2.69
  15  -5   4    4.42    2.26
  15   5   4    4.56    3.00
 -15  -5  -5   -0.33    2.43
  15   5   5   -0.15    2.73
  16   0 -18   61.62    8.20
  16   0 -17   -0.09    2.35
  16   0 -16  118.00   10.13
  16   0 -16  146.05    9.92
  16   0 -15    0.36    2.41
 -16   0  14  127.17   11.61
  16   0 -14  155.20   13.88
  16   0 -14  116.34   12.14
 -16   0  13    0.12    2.55
  16   0 -13    0.22    2.46
 -16   0  12  111.49    8.95
  16   0 -12  114.01   10.56
  16   0 -11    0.25    2.11
 -16   0  11    0.21    2.79
  16   0 -11    0.22    3.31
  16   0 -10  496.10   18.32
 -16   0  10  411.77   17.83
  16   0 -10  460.53   18.94
  16   0  -9    0.18    1.74
 -16   0   9    0.76    2.38
  16   0  -9   -0.86    3.58
  16   0  -8  308.09   16.05
  16   0  -7    0.18    1.90
  16   0  -6  282.82   10.51
  16   0  -6  256.75   13.05
  16   0  -5    1.46    1.93
  16   0  -5    0.59    3.39
  16   0  -4   66.11    6.77
  16   0  -4   66.86    8.48
  16   0  -3   -0.42    2.12
  16   0  -3   -0.74    2.33
  16   0  -3    0.37    3.09
  16   0  -2  201.88    9.25
  16   0  -2  195.55   11.63
  16   0  -2  188.51   15.34
  16   0  -1    0.94    2.11
  16   0  -1    0.80    2.33
  16   0  -1   -0.37    2.78
  16   0   0  126.91    9.29
  16   0   0  140.56   10.97
  16   0   0  109.10   10.91
  16   0   1    0.50    1.97
  16   0   1    0.43    2.58
  16   0   1   -0.52    2.91
  16   0   2    1.48    2.09
  16   0   2    1.29    2.43
  16   0   2    0.97    2.54
  16   0   3    0.55    2.72
  16   0   3   -0.27    2.38
  16   0   4   11.49    2.85
  16   0   4    8.12    2.69
  16   0   5   -0.77    2.73
  16   0   6    3.00    2.87
  16   0   7    0.49    2.79
  16   0   8  115.08   10.79
  16   0   9   -0.27    2.64
  16  -2 -16    5.95    2.92
  16  -2 -16    6.25    2.70
  16   2 -16    6.43    2.87
 -16  -2  15    0.80    2.17
 -16  -2  15    0.94    2.52
  16  -2 -15    0.85    2.51
  16  -2 -15    1.34    2.43
 -16  -2  14   37.56    6.37
 -16  -2  14   39.43    5.92
  16  -2 -14   41.69    6.92
  16  -2 -14   54.53    6.92
 -16  -2  13    0.92    2.46
 -16  -2  13    0.76    2.64
  16  -2 -13    0.16    2.38
 -16  -2  12   17.61    3.93
  16   2 -12   23.30    3.15
 -16  -2  12   17.65    3.52
  16  -2 -12   23.59    3.46
  16  -2 -12   18.93    3.47
  16   2 -12   19.57    5.72
 -16  -2  11   11.25    2.98
  16   2 -11   12.83    2.64
 -16  -2  11   10.93    2.75
  16  -2 -11   12.01    3.73
  16   2 -11   12.99    3.79
  16  -2 -10    6.19    2.63
  16   2 -10    4.93    2.08
 -16  -2  10    4.48    2.85
  16  -2 -10    5.21    2.69
  16  -2 -10    5.57    3.55
  16   2 -10    3.65    3.59
  16  -2  -9   27.10    4.39
  16   2  -9   24.08    3.10
 -16  -2   9   19.58    3.55
  16  -2  -9   22.11    3.70
  16  -2  -9   20.98    3.88
  16   2  -9   21.10    4.69
  16  -2  -8   66.77    5.86
  16   2  -8   72.42    5.66
 -16  -2   8   54.10    5.86
  16  -2  -8   55.56    5.51
  16  -2  -8   61.51    8.46
  16   2  -8   60.50    6.95
  16  -2  -7    2.94    1.93
  16   2  -7    3.70    2.27
 -16  -2   7    1.81    2.55
  16  -2  -7    2.60    1.81
  16  -2  -7    3.74    2.84
  16   2  -7    4.29    3.18
  16  -2  -6   80.22    6.43
  16   2  -6   90.70    6.03
 -16  -2   6   61.59    5.61
  16  -2  -6   65.21    5.15
  16  -2  -6   77.01    7.87
  16   2  -6   74.12    6.35
  16  -2  -5   13.79    2.69
 -16  -2   5   10.99    2.84
  16  -2  -5   12.66    2.54
  16  -2  -5   12.78    3.33
  16   2  -5   15.86    3.71
  16  -2  -4    5.69    2.39
  16   2  -4    6.99    2.57
  16  -2  -4    4.72    1.81
  16  -2  -4    4.71    3.28
  16   2  -4    5.76    3.37
  16   2  -3  104.14    7.16
  16  -2  -3   80.87    6.44
  16  -2  -3   70.18    6.70
  16   2  -3   85.74    7.85
  16  -2  -2   85.42    7.38
  16   2  -2   81.53    5.49
  16  -2  -2   80.10    7.04
  16  -2  -2   55.90    6.47
  16  -2  -1    3.24    1.87
  16   2  -1    3.33    1.86
  16  -2   0  103.99    7.26
  16   2   0   98.87    6.99
  16  -2   0   91.38    7.82
  16   2   0   80.55    7.93
  16  -2   1   22.06    2.87
  16   2   1   23.92    3.53
  16  -2   1   21.93    4.45
  16   2   1   19.60    4.83
  16  -2   2   83.32    6.58
  16   2   2   68.13    5.83
  16  -2   2   74.93    7.32
  16   2   2   69.05    9.28
  16  -2   3    5.20    1.97
  16   2   3    5.89    3.06
  16  -2   4    2.23    1.77
  16   2   4    2.88    2.87
  16  -2   5    0.73    2.69
  16   2   5   -0.28    2.46
  16  -2   6   27.26    4.35
  16   2   6   30.70    4.83
  16  -2   7    0.65    2.51
  16   2   7    0.92    2.45
  16   2   7    0.27    2.39
  16  -2   8    7.25    2.70
 -16  -4  14   34.40    6.03
 -16  -4  14   30.70    5.20
 -16  -4  13   21.10    4.23
 -16  -4  13   19.15    3.77
 -16  -4  12   10.97    3.25
  16   4 -12   10.39    3.09
 -16  -4  11  246.58   12.99
  16   4 -11  300.00   10.53
 -16  -4  11  240.54   11.77
 -16  -4  10    0.71    2.54
  16   4 -10    1.78    2.26
 -16  -4  10    1.78    2.79
 -16  -4   9    0.68    2.60
  16   4  -9    1.14    1.96
 -16  -4   9    2.24    2.85
 -16  -4   8   98.82   10.38
  16  -4  -8  110.66    9.55
  16   4  -8  127.00    9.61
 -16  -4   8   91.67    9.32
 -16  -4   7  150.62   13.85
  16  -4  -7  156.21   11.60
  16   4  -7  198.91   14.25
 -16  -4   7  155.33   13.47
 -16  -4   6    8.40    3.93
  16  -4  -6   11.52    2.55
 -16  -4   6    7.62    2.88
  16   4  -6   10.35    3.74
 -16  -4   5   85.88    9.80
  16  -4  -5   85.43    8.25
  16   4  -5  115.38    8.85
 -16  -4   5   78.44    9.55
  16   4  -5   91.73   11.00
 -16  -4   4   33.11    5.30
  16  -4  -4   32.80    4.07
  16   4  -4   46.28    4.90
 -16  -4   4   29.89    5.40
  16   4  -4   40.10    6.83
  16  -4  -3   23.38    3.27
  16   4  -3   31.13    4.08
 -16  -4   3   22.40    4.63
  16   4  -3   24.82    5.33
  16   4  -2    1.68    2.24
 -16  -4   2    0.53    2.45
  16   4  -2    0.53    2.88
 -16  -4   1   93.23   10.59
  16  -4  -1   90.03    8.33
  16   4  -1  109.90    8.73
  16   4  -1   92.07    9.74
  16  -4   0   11.65    2.58
  16   4   0   11.60    2.67
  16   4   0   11.09    3.68
 -16  -4  -1   61.85    8.97
  16  -4   1   59.27    6.44
  16   4   1   62.16    8.45
  16  -4   2    0.70    2.08
  16   4   2    0.74    2.98
  16  -4   3  121.73    7.44
  16   4   3  119.30   10.66
  16  -4   4   27.47    4.19
  16   4   5   74.55    9.50
  17   1 -16   20.46    4.60
  17  -1 -15   14.95    3.55
  17  -1 -15   16.61    3.76
  17   1 -15   17.40    3.67
 -17  -1  14    8.28    2.81
  17  -1 -14    7.26    3.12
  17  -1 -14   11.05    2.97
 -17  -1  13   46.00    6.47
  17  -1 -13   40.18    6.01
  17  -1 -13   58.88    7.28
  17   1 -13   45.33    7.72
 -17  -1  12   39.42    5.30
  17  -1 -12   40.21    5.97
  17   1 -12   42.77    8.00
  17   1 -11    0.27    1.94
 -17  -1  11   -0.53    2.60
  17  -1 -11    0.55    2.75
  17   1 -11   -0.86    3.39
  17  -1 -10   14.94    3.39
  17   1 -10   13.91    2.85
 -17  -1  10   11.28    3.13
  17  -1 -10   13.07    3.21
  17   1 -10   13.04    4.13
  17  -1  -9    3.31    2.45
  17   1  -9    2.69    1.99
 -17  -1   9    1.77    2.00
  17  -1  -9    3.43    2.61
  17  -1  -9    2.42    3.36
  17   1  -9    2.57    2.82
  17  -1  -8    9.13    2.55
  17   1  -8    7.39    2.24
 -17  -1   8    5.05    2.69
  17  -1  -8    6.83    2.78
  17  -1  -8    7.04    3.88
  17   1  -8    7.81    3.85
  17  -1  -7    2.41    2.20
  17   1  -7    2.88    2.36
  17  -1  -7    3.10    2.36
  17  -1  -7    1.72    3.36
  17   1  -7    2.02    3.59
  17  -1  -6   34.09    3.70
  17   1  -6   33.57    4.47
  17  -1  -6   29.77    4.42
  17  -1  -6   31.54    4.69
  17   1  -6   28.11    4.13
  17  -1  -5   12.86    2.64
  17  -1  -5   11.14    3.19
  17  -1  -5   11.51    3.40
  17   1  -4   30.44    4.29
  17  -1  -4   22.66    3.49
  17  -1  -4   25.14    4.83
  17   1  -4   22.91    3.83
  17  -1  -3    5.98    2.45
  17   1  -3    6.47    2.52
  17  -1  -3    5.15    2.46
  17  -1  -3    4.88    2.81
  17   1  -3    5.06    3.07
  17  -1  -2    3.76    2.38
  17   1  -2    2.84    2.15
  17  -1  -2    2.48    2.70
  17  -1  -2    2.29    3.04
  17   1  -2    3.53    3.19
  17  -1  -1   60.46    6.25
  17   1  -1   54.74    5.03
  17  -1  -1   48.46    5.24
  17  -1  -1   40.99    5.32
  17   1  -1   50.55    6.95
  17  -1   0   41.78    4.93
  17   1   0   39.29    5.05
  17  -1   0   29.32    4.31
  17  -1   0   25.00    4.29
  17   1   0   30.14    5.39
  17  -1   1    1.11    1.93
  17   1   1    0.97    1.99
  17  -1   1    0.86    2.78
  17   1   1    0.64    2.30
  17  -1   2   25.69    4.38
  17   1   2   28.83    4.57
  17  -1   2   25.77    4.48
  17   1   2   26.13    4.86
  17   1   2   23.22    4.93
  17  -1   3    5.58    2.11
  17  -1   3    5.21    2.92
  17   1   3    5.85    3.90
  17   1   3    4.80    2.79
  17  -1   4   27.84    4.44
  17   1   4   31.30    5.60
  17   1   4   21.87    4.68
  17  -1   5    2.38    2.57
  17   1   5    2.85    2.52
  17   1   5    2.26    2.61
  17  -1   6    9.40    3.00
  17   1   6    9.43    2.97
  17  -1   7   -0.34    2.94
 -17  -3  14    3.06    2.75
 -17  -3  13    4.04    2.70
 -17  -3  12    5.98    2.70
  17   3 -12    5.69    2.11
 -17  -3  12    6.19    2.75
 -17  -3  11    0.62    2.43
  17   3 -11    0.88    1.87
 -17  -3  11    1.13    2.48
  17  -3 -11    1.01    2.18
 -17  -3  10   17.22    3.95
  17   3 -10   25.09    3.70
 -17  -3  10   18.68    4.05
  17  -3 -10   23.73    3.80
 -17  -3   9   44.67    6.87
  17  -3  -9   56.32    6.93
  17   3  -9   50.44    5.60
 -17  -3   9   46.81    6.64
  17  -3  -9   49.49    5.73
  17   3  -9   50.78    8.94
 -17  -3   8    9.83    3.13
  17  -3  -8   13.54    3.21
  17   3  -8   14.24    3.12
 -17  -3   8   11.36    3.22
  17  -3  -8   13.01    3.33
  17  -3  -8    8.97    3.43
  17   3  -8   13.12    4.78
  17  -3  -7   39.08    4.97
  17   3  -7   43.50    5.05
 -17  -3   7   30.35    4.81
  17  -3  -7   30.21    4.16
  17  -3  -7   27.36    4.90
  17   3  -7   32.84    6.25
  17  -3  -6    4.17    1.92
 -17  -3   6    3.61    2.52
  17  -3  -6    3.46    2.02
  17  -3  -6    2.60    2.49
  17   3  -6    3.03    3.71
  17  -3  -5   20.61    3.24
  17   3  -5   20.96    3.27
 -17  -3   5   15.83    3.82
  17  -3  -5   15.86    2.98
  17  -3  -5   12.90    3.00
  17   3  -5   20.47    4.86
  17  -3  -4   10.33    2.54
  17   3  -4   11.71    2.64
  17   3  -4   10.42    3.46
  17   3  -3   10.87    2.72
  17   3  -3    7.72    3.59
  17  -3  -2   13.10    2.85
  17   3  -2   16.24    3.04
  17   3  -2   13.87    3.90
  17  -3  -1    2.91    2.18
  17   3  -1    3.58    2.23
  17   3  -1    2.94    3.16
  17  -3   0   54.77    6.43
  17   3   0   60.56    7.30
  17   3   0   45.37    7.02
  17  -3   1   19.38    3.25
  17  -3   2   84.38    6.44
  17   3   2   79.31    7.62
  17  -3   3   12.23    2.88
  17  -3   3   10.78    3.07
  17   3   3   11.61    3.43
  17   3   4    9.12    4.16
  17   3   5   47.48    7.62
  17   5  -8   13.60    3.10
 -17  -5   7    0.04    2.82
  17   5  -6    1.10    2.24
  17  -5  -5    2.94    2.38
  17   5  -5    4.16    2.43
  17  -5  -4    1.13    2.11
  17   5  -4    2.58    2.11
  17  -5  -3    0.77    2.15
  17  -5  -2    5.23    2.49
  18   0 -14    2.43    2.35
  18   0 -13   -0.01    2.30
  18   0 -12  124.03   10.35
  18   0 -11    0.64    1.99
  18   0 -11    0.64    2.60
  18   0 -11   -0.64    2.98
  18   0 -10  422.99   17.76
  18   0 -10  384.07   32.53
  18   0 -10  352.01   30.84
  18   0  -9    0.21    2.20
  18   0  -9    0.37    3.47
  18   0  -8   61.21    8.14
  18   0  -7    0.33    2.00
  18   0  -7    0.77    3.03
  18   0  -6   52.29    6.84
  18   0  -6   41.11    7.94
  18   0  -5   -0.45    3.19
  18   0  -4   94.09    9.62
  18   0  -4   70.79    8.54
  18   0  -3    0.07    2.30
  18   0  -3   -0.46    3.03
  18   0  -2    0.80    2.23
  18   0  -2    1.07    3.10
  18   0  -1   -0.48    2.15
  18   0  -1    0.16    2.24
  18   0  -1    0.00    2.55
  18   0   0    5.11    2.30
  18   0   0    3.71    2.43
  18   0   0    2.79    2.84
  18   0   1   -0.04    2.02
  18   0   1   -0.70    2.30
  18   0   1   -0.13    2.49
  18   0   2    2.21    1.94
  18   0   2    1.80    2.48
  18   0   2    1.44    2.70
  18   0   3    0.52    2.38
  18   0   4    0.85    2.43
 -18  -2  13   21.34    3.88
 -18  -2  12   39.61    5.79
  18  -2 -12   52.34    6.81
  18   2 -11    0.33    1.78
 -18  -2  11    0.31    2.21
  18  -2 -11    0.18    2.33
  18   2 -11    0.24    3.18
  18   2 -10   73.79    6.25
 -18  -2  10   56.08    5.85
  18  -2 -10   77.37    6.64
  18  -2 -10   63.66    6.83
  18   2 -10   69.19   10.07
  18  -2  -9   81.73    6.93
  18   2  -9   81.96    6.46
 -18  -2   9   55.11    6.10
  18  -2  -9   69.72    6.12
  18  -2  -9   63.75    6.96
  18   2  -9   70.48    8.42
  18  -2  -8   50.27    6.65
  18   2  -8   48.73    6.30
  18  -2  -8   39.98    5.37
  18  -2  -8   37.88    6.38
  18   2  -8   41.93    8.48
  18  -2  -7    4.37    2.39
  18   2  -7    3.89    2.29
  18  -2  -7    2.94    2.14
  18  -2  -7    3.49    3.04
  18   2  -7    2.08    3.33
  18  -2  -6   24.50    3.93
  18  -2  -6   18.62    3.74
  18  -2  -6   18.17    3.88
  18   2  -6   19.75    4.07
  18  -2  -5    9.40    2.54
  18   2  -5   11.19    2.84
  18  -2  -5    8.31    3.16
  18   2  -5    8.57    3.53
  18  -2  -4   30.84    5.30
  18   2  -4   36.32    5.24
  18  -2  -4   23.47    4.90
  18   2  -4   28.31    6.00
  18   2  -3    1.29    2.23
  18  -2  -3    0.77    2.43
  18  -2  -2   43.35    6.30
  18   2  -2   50.33    7.44
  18  -2  -1    0.28    2.12
  18   2  -1    0.85    2.06
  18   2  -1    0.49    3.03
  18  -2   0   28.92    4.42
  18   2   0   30.96    4.37
  18   2   0   24.32    4.63
  18  -2   1   12.03    2.61
  18   2   1   10.48    3.34
  18  -2   2   10.76    2.76
  18   2   2    8.49    3.10
  18   2   3   10.94    4.14
  18   4  -8    1.35    2.54
  18  -4  -6    6.06    2.38
  18   4  -6    7.17    2.52
  18  -4  -5    3.06    2.17
  18   4  -5    3.74    2.26
  18  -4  -4   16.09    3.79
  18   4  -4   24.57    3.86
  18  -4  -3   13.81    2.82
  18   4  -3   17.13    3.10
  19  -1 -11   13.76    3.55
  19   1 -11   12.90    3.10
  19   1 -11   11.60    3.79
  19   1 -10    0.36    2.03
  19  -1 -10    0.25    2.26
  19   1 -10   -0.09    2.21
  19  -1 -10    0.55    2.49
  19   1 -10   -0.43    3.01
  19  -1  -9    0.79    2.14
  19   1  -9    0.43    1.99
  19  -1  -9    0.58    2.17
  19  -1  -9    0.34    2.66
  19   1  -9    0.03    2.91
  19  -1  -8   55.01    6.50
  19   1  -8   58.85    6.87
  19  -1  -8   46.75    5.70
  19  -1  -8   42.72    6.32
  19   1  -8   44.35    7.30
  19  -1  -7   -0.15    2.03
  19  -1  -7    0.18    2.06
  19  -1  -7   -0.33    2.79
  19   1  -7    0.07    3.01
  19  -1  -6   21.10    4.38
  19   1  -6   22.36    5.00
  19   1  -6   15.78    3.15
  19  -1  -6   14.70    3.93
  19  -1  -5    2.55    2.33
  19  -1  -5    2.08    2.88
  19   1  -4   57.37    6.04
  19  -1  -4   40.74    5.66
  19   1  -4   43.89    5.83
  19  -1  -3    1.65    2.27
  19   1  -3    2.06    2.36
  19  -1  -3    1.20    2.66
  19   1  -3    1.53    2.85
  19  -1  -2   45.54    6.27
  19   1  -2   45.91    6.46
  19  -1  -2   30.63    5.40
  19   1  -2   31.61    6.00
  19  -1  -1   15.20    3.53
  19   1  -1   15.07    3.43
  19   1  -1   10.70    3.62
  19  -1   0    0.03    2.00
  19   1   0    0.56    2.69
  19   3  -6    5.29    2.84
  19   3  -5    1.60    2.60

_computing_structure_solution     'SHELXT 2014/4 (Sheldrick, 2014)'
;
_shelx_hkl_checksum   86855
